# Supplementary material for: Bacterial regulon modeling and prediction based on systematic cis regulatory motif analyses
Source: PubMed Central journal article supplement (PMC4792141; doi:10.1038/srep23030), 2016-03-15
Supplement: srep23030-s1.pdf [file srep23030-s1.pdf]

# Supplementary Materials

## Bacterial regulon modeling and prediction based on systematic *cis* regulatory motif analyses

Bingqiang Liu<sup>1</sup>, Chuan Zhou<sup>1</sup>, Guojun Li<sup>1</sup>, Hanyuan Zhang<sup>2</sup>, Erliang Zeng<sup>3,4,7</sup>, Qi Liu<sup>6</sup>, Qin Ma<sup>5,7,\*</sup>

<sup>1</sup>School of Mathematics, Shandong University, Jinan, Shandong, China,

<sup>2</sup>Systems Biology and Biomedical Informatics (SBBI) Laboratory University of Nebraska-Lincoln.  
Lincoln, NE 68588-0115, USA,

<sup>3</sup>Department of Biology, University of South Dakota, Vermillion, SD 57069, USA,

<sup>4</sup>Department of Computer Science, University of South Dakota, Vermillion, SD 57069, USA,

<sup>5</sup>Department of Plant Science, South Dakota State University, Brookings, SD, 57006, USA,

<sup>6</sup>Department of Bioinformatics, School of Life Sciences and Technology, Tongji University, Shanghai, China, and

<sup>7</sup>South Dakota Biochemical Spatiotemporal NeTwork Resource (BioSNTR), SD, USA. §Corresponding author.

Bingqiang Liu: [bingqiangsdu@gmail.com](mailto:bingqiangsdu@gmail.com)

Chuan Zhou: [zhouchuan121@gmail.com](mailto:zhouchuan121@gmail.com)

Guojun Li: [guojunsdu@gmail.com](mailto:guojunsdu@gmail.com)

Hanyuan Zhang: [unlzhhy@huskers.unl.edu](mailto:unlzhhy@huskers.unl.edu)

Erliang Zeng: [Erliang.Zeng@usd.edu](mailto:Erliang.Zeng@usd.edu)

Qi Liu: [qiliu@tongji.edu.cn](mailto:qiliu@tongji.edu.cn)

Qin Ma: [qin.ma@sdstate.edu](mailto:qin.ma@sdstate.edu)

To whom correspondence should be addressed:

Tel: +1 605-688-6315,

Email: [qin.ma@sdstate.edu](mailto:qin.ma@sdstate.edu).

**Table S1.** Comparison analysis of CRS, GFR and PCS according to top X edges

| Step  | Type | In_Reg_Edge | Regulon coverage |
|-------|------|-------------|------------------|
| 500   | CRS  | 91          | 25               |
| 1000  | CRS  | 145         | 32               |
| 1500  | CRS  | 187         | 34               |
| 2000  | CRS  | 227         | 35               |
| 2500  | CRS  | 265         | 38               |
| 3000  | CRS  | 295         | 38               |
| 3500  | CRS  | 318         | 39               |
| 4000  | CRS  | 345         | 43               |
| 4500  | CRS  | 378         | 44               |
| 5000  | CRS  | 405         | 45               |
| 5500  | CRS  | 426         | 45               |
| 6000  | CRS  | 453         | 46               |
| 6500  | CRS  | 475         | 48               |
| 7000  | CRS  | 499         | 49               |
| 7500  | CRS  | 518         | 50               |
| 8000  | CRS  | 546         | 50               |
| 8500  | CRS  | 574         | 53               |
| 9000  | CRS  | 602         | 53               |
| 9500  | CRS  | 629         | 54               |
| 10000 | CRS  | 653         | 55               |
| 10500 | CRS  | 674         | 55               |
| 11000 | CRS  | 687         | 55               |
| 11500 | CRS  | 704         | 55               |
| 12000 | CRS  | 727         | 56               |
| 12500 | CRS  | 751         | 58               |
| 13000 | CRS  | 773         | 58               |
| 13500 | CRS  | 799         | 58               |
| 14000 | CRS  | 820         | 60               |
| 14500 | CRS  | 851         | 61               |
| 15000 | CRS  | 868         | 61               |
| 15500 | CRS  | 883         | 61               |
| 16000 | CRS  | 899         | 61               |
| 16500 | CRS  | 927         | 61               |
| 17000 | CRS  | 958         | 61               |
| 17500 | CRS  | 978         | 62               |
| 18000 | CRS  | 1011        | 62               |
| 18500 | CRS  | 1026        | 63               |
| 19000 | CRS  | 1044        | 63               |
| 19500 | CRS  | 1062        | 64               |
| 20000 | CRS  | 1080        | 64               |
| 20500 | CRS  | 1100        | 64               |
| 21000 | CRS  | 1119        | 64               |
| 21500 | CRS  | 1139        | 64               |
| 22000 | CRS  | 1149        | 64               |
| 22500 | CRS  | 1165        | 65               |

|       |     |      |    |
|-------|-----|------|----|
| 23000 | CRS | 1181 | 65 |
| 23500 | CRS | 1201 | 65 |
| 24000 | CRS | 1230 | 65 |
| 24500 | CRS | 1247 | 65 |
| 25000 | CRS | 1271 | 66 |
| 500   | GFR | 97   | 18 |
| 1000  | GFR | 201  | 21 |
| 1500  | GFR | 241  | 26 |
| 2000  | GFR | 268  | 30 |
| 2500  | GFR | 286  | 31 |
| 3000  | GFR | 302  | 33 |
| 3500  | GFR | 320  | 33 |
| 4000  | GFR | 343  | 41 |
| 4500  | GFR | 363  | 41 |
| 5000  | GFR | 382  | 43 |
| 5500  | GFR | 394  | 43 |
| 6000  | GFR | 414  | 47 |
| 6500  | GFR | 430  | 50 |
| 7000  | GFR | 444  | 51 |
| 7500  | GFR | 466  | 51 |
| 8000  | GFR | 485  | 53 |
| 8500  | GFR | 499  | 53 |
| 9000  | GFR | 514  | 54 |
| 9500  | GFR | 530  | 54 |
| 10000 | GFR | 552  | 55 |
| 10500 | GFR | 562  | 56 |
| 11000 | GFR | 578  | 58 |
| 11500 | GFR | 590  | 58 |
| 12000 | GFR | 608  | 58 |
| 12500 | GFR | 616  | 58 |
| 13000 | GFR | 631  | 60 |
| 13500 | GFR | 653  | 60 |
| 14000 | GFR | 667  | 60 |
| 14500 | GFR | 682  | 60 |
| 15000 | GFR | 698  | 61 |
| 15500 | GFR | 713  | 61 |
| 16000 | GFR | 725  | 62 |
| 16500 | GFR | 740  | 65 |
| 17000 | GFR | 760  | 65 |
| 17500 | GFR | 774  | 65 |
| 18000 | GFR | 784  | 65 |
| 18500 | GFR | 799  | 65 |
| 19000 | GFR | 809  | 65 |
| 19500 | GFR | 824  | 65 |
| 20000 | GFR | 838  | 65 |
| 20500 | GFR | 851  | 65 |
| 21000 | GFR | 863  | 65 |
| 21500 | GFR | 872  | 65 |
| 22000 | GFR | 886  | 66 |

|       |     |     |    |
|-------|-----|-----|----|
| 22500 | GFR | 905 | 66 |
| 23000 | GFR | 920 | 66 |
| 23500 | GFR | 929 | 66 |
| 24000 | GFR | 938 | 66 |
| 24500 | GFR | 950 | 66 |
| 25000 | GFR | 963 | 67 |
| 500   | PCS | 10  | 6  |
| 1000  | PCS | 22  | 13 |
| 1500  | PCS | 34  | 16 |
| 2000  | PCS | 42  | 16 |
| 2500  | PCS | 48  | 19 |
| 3000  | PCS | 52  | 20 |
| 3500  | PCS | 60  | 20 |
| 4000  | PCS | 67  | 22 |
| 4500  | PCS | 77  | 26 |
| 5000  | PCS | 81  | 26 |
| 5500  | PCS | 92  | 28 |
| 6000  | PCS | 101 | 29 |
| 6500  | PCS | 106 | 29 |
| 7000  | PCS | 115 | 30 |
| 7500  | PCS | 121 | 31 |
| 8000  | PCS | 127 | 31 |
| 8500  | PCS | 135 | 32 |
| 9000  | PCS | 144 | 33 |
| 9500  | PCS | 148 | 33 |
| 10000 | PCS | 152 | 33 |
| 10500 | PCS | 160 | 33 |
| 11000 | PCS | 169 | 34 |
| 11500 | PCS | 172 | 35 |
| 12000 | PCS | 184 | 35 |
| 12500 | PCS | 194 | 38 |
| 13000 | PCS | 207 | 38 |
| 13500 | PCS | 214 | 38 |
| 14000 | PCS | 220 | 39 |
| 14500 | PCS | 230 | 40 |
| 15000 | PCS | 236 | 40 |
| 15500 | PCS | 241 | 41 |
| 16000 | PCS | 247 | 42 |
| 16500 | PCS | 255 | 42 |
| 17000 | PCS | 265 | 44 |
| 17500 | PCS | 276 | 45 |
| 18000 | PCS | 281 | 45 |
| 18500 | PCS | 289 | 45 |
| 19000 | PCS | 295 | 45 |
| 19500 | PCS | 300 | 45 |
| 20000 | PCS | 305 | 45 |
| 20500 | PCS | 312 | 45 |
| 21000 | PCS | 321 | 45 |
| 21500 | PCS | 328 | 45 |

|       |     |     |    |
|-------|-----|-----|----|
| 22000 | PCS | 332 | 45 |
| 22500 | PCS | 335 | 45 |
| 23000 | PCS | 343 | 46 |
| 23500 | PCS | 355 | 47 |
| 24000 | PCS | 357 | 48 |
| 24500 | PCS | 365 | 49 |
| 25000 | PCS | 371 | 49 |

**Table S2.** The transitivity scores of 17 regulons (containing >20 operons) regarding three standards.

| score | regulon | nodes | edges | edge_density | average_score | transitivity |
|-------|---------|-------|-------|--------------|---------------|--------------|
| CRS   | FNR     | 94    | 1137  | 0.26         | 17.782        | 0.389        |
| CRS   | Fis     | 57    | 417   | 0.261        | 17.22         | 0.349        |
| CRS   | H-NS    | 56    | 466   | 0.303        | 17.439        | 0.459        |
| CRS   | FruR    | 32    | 152   | 0.306        | 19.247        | 0.429        |
| CRS   | Lrp     | 28    | 114   | 0.302        | 17.007        | 0.42         |
| CRS   | LexA    | 25    | 112   | 0.373        | 18.8          | 0.612        |
| CRS   | NsrR    | 31    | 121   | 0.26         | 17.732        | 0.34         |
| CRS   | CRP     | 176   | 3674  | 0.239        | 16.856        | 0.309        |
| CRS   | IHF     | 67    | 613   | 0.277        | 17.335        | 0.365        |
| CRS   | MarA    | 20    | 26    | 0.137        | 17.397        | 0.221        |
| CRS   | PhoP    | 28    | 73    | 0.193        | 17.492        | 0.315        |
| CRS   | ArcA    | 58    | 434   | 0.263        | 16.809        | 0.323        |
| CRS   | NarL    | 29    | 132   | 0.325        | 18.276        | 0.435        |
| CRS   | Fur     | 45    | 430   | 0.434        | 20.066        | 0.668        |
| CRS   | CpxR    | 29    | 87    | 0.214        | 16.968        | 0.296        |
| CRS   | SoxS    | 20    | 24    | 0.126        | 15.442        | 0.375        |
| PCS   | FNR     | 81    | 1230  | 0.38         | 0.006         | 0.409        |
| PCS   | Fis     | 47    | 381   | 0.352        | 0.006         | 0.383        |
| PCS   | H-NS    | 36    | 242   | 0.384        | 0.005         | 0.408        |
| PCS   | FruR    | 30    | 157   | 0.361        | 0.005         | 0.418        |
| PCS   | Lrp     | 22    | 98    | 0.424        | 0.005         | 0.413        |
| PCS   | LexA    | 18    | 58    | 0.379        | 0.007         | 0.398        |
| PCS   | NsrR    | 26    | 110   | 0.338        | 0.005         | 0.384        |
| PCS   | CRP     | 136   | 3403  | 0.371        | 0.005         | 0.396        |
| PCS   | IHF     | 54    | 517   | 0.361        | 0.005         | 0.382        |
| PCS   | MarA    | 16    | 48    | 0.4          | 0.006         | 0.388        |
| PCS   | PhoP    | 18    | 65    | 0.425        | 0.005         | 0.454        |
| PCS   | ArcA    | 48    | 412   | 0.365        | 0.005         | 0.388        |
| PCS   | NarL    | 26    | 139   | 0.428        | 0.006         | 0.442        |
| PCS   | Fur     | 39    | 315   | 0.425        | 0.005         | 0.47         |
| PCS   | CpxR    | 21    | 81    | 0.386        | 0.006         | 0.396        |
| PCS   | SoxS    | 16    | 53    | 0.442        | 0.005         | 0.429        |
| GFR   | FNR     | 73    | 1774  | 0.675        | 0.277         | 0.819        |
| GFR   | Fis     | 49    | 683   | 0.581        | 0.298         | 0.763        |
| GFR   | H-NS    | 44    | 453   | 0.479        | 0.205         | 0.737        |
| GFR   | FruR    | 31    | 365   | 0.785        | 0.904         | 0.904        |
| GFR   | Lrp     | 22    | 156   | 0.675        | 0.548         | 0.855        |
| GFR   | LexA    | 14    | 71    | 0.78         | 0.935         | 0.818        |
| GFR   | NsrR    | 18    | 82    | 0.536        | 0.248         | 0.716        |
| GFR   | CRP     | 154   | 7385  | 0.627        | 0.24          | 0.771        |
| GFR   | IHF     | 56    | 747   | 0.485        | 0.193         | 0.732        |

|            |      |    |      |       |       |       |
|------------|------|----|------|-------|-------|-------|
| <b>GFR</b> | MarA | 12 | 54   | 0.818 | 0.386 | 0.891 |
| <b>GFR</b> | PhoP | 17 | 79   | 0.581 | 0.316 | 0.783 |
| <b>GFR</b> | ArcA | 52 | 1016 | 0.766 | 0.305 | 0.877 |
| <b>GFR</b> | NarL | 26 | 185  | 0.569 | 0.181 | 0.727 |
| <b>GFR</b> | Fur  | 34 | 415  | 0.74  | 1.159 | 0.824 |
| <b>GFR</b> | CpxR | 21 | 116  | 0.552 | 0.312 | 0.716 |
| <b>GFR</b> | SoxS | 14 | 65   | 0.714 | 0.438 | 0.815 |

**Table S3.** The identified top 100 operon clusters based on CRS, GFR and PCS.

CRS1 16130967-90111214-16129075-16130089-16129216-16130504-16130505-16129217-16130504-16130505-16128633-90111562-16131133-90111562-16131133-90111444-16129202-16129203-16131469-145698229-94541112-16131028-16129217-16129166-16129216-16131242-16131243-16129185-16129186-16131244-90111444-16130703-145698279-145698297-16130321-16130320-16128604-16128633-16131243-16131242-16129771-16132089-16132090-16131680-49176425-16129202-16129203-16130119-90111214-16129075-16129487-16128757-16128607-145698298-345452716-16129732-16130518-16129724-16129733-16129972-16129072-16130081-16131469-49176351-90111079-16130987-16130988

CRS2 16129804-90111591-90111591-90111591-90111591-16131238-16132089-16132090-226524724-49176350

CRS3 16128194-94541120-16131810-16129858-49176415-16130540-90111716-90111364-16130281-16128266-16130720-226524751-145698249-49176415-16129623-16129623-226524727

CRS4 16129801-16129324-16129802-145698329-16128095-226524720-16128564-49176035-16128747-162135920-16129146-16129950-49176247

CRS5 16128564-49176035-145698329-16129024-16131665-16129146-16129950-16129139-16129140-49176247-145698274-90111626-90111626

CRS6 16128188-16131548-49176459-16128938-16131919-90111508-90111152-16129266-16128406-16128471-16129444-16128188-16129990-90111448-16130424-16131597-16132144-16129035-16129036-16129695-49176301-49176415-16128101-16129730-16130134-16130377-145698300-16131530-49176448-16130021-16130274-16130444-90111507-16131961-16131921-16130196-90111563-16129298-16131919-16128045-16131656-16128269-16128829-90111430-16128275-16128095-16128556-90111167-16129643-16129644-49176295

CRS7 16129802-16130248-16128912-16129801-16129644-16130476-16129643-16130477-16128396-16130401-90111448-16131524-16130424-16131525-16131890-16131342-16131343-16128321-16131890-16128507-49176239-171701683

CRS8 90111246-16129265-90111481-16130617-16128435-16129702-90111680-90111385-16130036-16131295-16131296

CRS9 16128428-16129755-16129719-16129720-16130879-16130880-16130275-16130879-16130880-145698292-16131364-90111421-16131365

CRS10 94541137-16128281-94541137-16128281-308209620-16129141-16129141-308209620-16129927-94541137-94541137-16128281-16128281

CRS11 90111481-90111481-16130617-16130617-90111481-16130617-16130633-16130632

CRS12 16131200-90111675-16131845-16128451-16128452-16128575-16128576-49176497-226524765-16129861-16129862-90111138-16130965-16130966-16132188-94541134-345452718-345452719-16132112-16132153-16129904-16129905-90111675-16131845-16131284-90111112-16129631-16128290-145698318-16130631-16130010-16130011-16129184-226524726-16128576-16129854-16128765-16132049-162135896-16132048

CRS13 16128192-16128193-16131779-16131677-16131678-16129149-16129150-16128955-16128956-16129516-16129517-16130904-16130906-16131838-16131839

CRS14 90111665-16131021-90111603-90111743-16132021-296044035-90111655-16131202-16131203-16128966-16128967-16129969-16128265-16130084-16132120-16130667-16131958-16131958-16130667-16130844-16129691-16130581-16130580-16128584-16129388-16131970-16132186-16129387-16131200-90111154-16131104-16128602-90111575-16131104-16128515-16129419-16130331-16132082-16132083-16129633-16132048-16132049-90111643-16129139-16128832-16130002-90111154-16131306-16128602-16132055-16132054-16131490-90111622-16131624-49176402-90111225-16128602-16130507-16132166-90111154-16129733-16130506-16131306-16128203-90111361-16129122-16129539-145698243-16128258-16128832-16130357-90111444-16130667-145698244-16130049-16130504-16130505-16131570-16130617-90111481-16128266-16131389-16128266-16131389-16130176-16130175-16129659-16129658-16129978-16130687-16128278-16129736-16130918-94541107-16128040-16128063-16130719-226524697-16128685-16128684-16128914-16128915-16128501-16128502-49176177-16129981-16129630-16129460-16128684-16128807-16128685-90111175-90111444-308209621-16128057-16128058-16130745-16130747-16132041-16132042-16129100-90111458-49176011-16128299-16130531-145698303-90111206-90111332-16128828-16129210-145698250-49176107-16129379-16129380-16130835-16129743-16129851-16128417-16131611-16131612-16128255-90111494-16130749-16128681-16129419-16131356-16128203-90111372-16129959

CRS15 145698229-145698229-16128543-16128543-16128773-94541112-94541112-16129640-16129640-16130093-16132188-94541134-16129661-16128773-16132188-94541134-16128723-16130324-16130325-162135920-16131296-16131295-16132115-16132114-16130668

CRS16 90111444-16131242-16131243-90111562-16131133-16129075-90111214-145698279-16131469-16128443-90111494-16130749-90111206-16128502-16129732-16132089-16128501-16129733-16132090-16132176-90111739-16128770-49176425-

16131680-16128042-16131470-90111561-90111421-145698292-16129854-49176425-226524726-16131680-16131470-90111631-16131535-16129749-16128117-90111088-90111287-90111489-16130682-16129660-16128593-90111681-16131887-16128705-16128706-16131937-90111286-90111690-90111691-16128034-16130703-16130814-16129901-16131279-16131280-90111440-226524741-16130643-16130916-16128156

CRS17 16129460-16129771-16128194-16129244-49176071-16128979-16130473-16129301-16128193-16128192-16130391-16128034-16128567-16128568-90111383-16129771-16130875-16128212-16128213-49176308-16131577-16130304-16129378-16130887-16130997-345452715-16128252-16129324-16128723-16129975-16131104-90111155-90111458-90111144-16130897-16131427-49176373-16131442-16128984-16129256-16129428-16131747-49176442-16129875-16129876-16131420-90111612-16131389-16128386-16132213-16132214-16132133-49176480-49176479-16129557-90111440-16131736-145698342-16129123-90111684-90111081-90111211-16129051-16130744-16130962-16128034-16130026-90111383-16128573-16128574-226524724-16130668-16129017-16129018-16130668-16129017-16129018-16129517-16129516-16128669-145698231-16130801-16131172-16128161-16128162-16128367-16129973-16128570-90111235-16129237-16128723-16132202-90111462-16130503-16129851-16130022-16131049-16131050-226524724-16131740-90111562-16130791-16131133-16128520-16129122-16130043-16130044-16128981-16132115-16132114-90111307-49176127-49176390-16128366-16128367-90111295-16129494-16130684-226524742-16130639-16130640-16128921-16131126-90111705-162135916-16129559-145698340-16128864-16128865-16130462-16131912-16130463-90111079-16129100-16129179-16129180-16131300-16131955-16131299-226524729-16129612-16129613-90111368-16131318-16129301-16128208-90111100-90111685-16128828-16131916-16129253-16130875-16128606-16131034-16128481-16128568-16128567-16129661-16128626-16128625-16131122-90111560-16132049-16132048-145698342-16128586-16130667-16129202-145698318-16129075-16130476-94541126-16131432-90111214-16130477-16132220

CRS18 16129086-16131325-16130103-16128022-16128032-16128209-16128214-16128308-16128308-90111117-345452717-94541100-16128650-16128665-16128701-90111173-16128828-16128984-16129013-16129041-16129695-49176170-16129985-16129985-16129999-16130069-16130082-16130170-90111452-16130719-16130825-16130859-90111523-16130965-16130966-16130978-16131134-16131134-49176343-16131325-16131415-16131471-145698327-90111642-16131593-16131595-16131742-16131755-16131775-16131842-16131842-16131859-16131863-16131880-16131894-16131922-16131933-16131933-16132002-49176475-16132059-16132081-16132145-16128607-308209619-16129799-16130377-16130377-16130976-16129221-90111657-90111131

CRS19 16132062-16128269-49176239-171701683-16131321-16130724-16131570-16130196-16128465-16130262-16130135-16130930-90111528-16130727-16130213-16129715-16129714-16130131-16131034-90111633-16131706-90111257-16128357-16128990-16130927-16132089-16131627-16132090-90111609-16130745-16128662-16128663-16128614-16130519-16128596-16131461-145698339-16131856-16128382-16128740-49176448-49176107-49176330-16131415-16129093-49176311-90111609

CRS20 16129123-16130920-16130921-90111685-16131916-16128134-16128896-162135899-16129658-16129659-16130095-16130096-16130335-16130336-16128364-90111125-16129630-16130272-90111155-16131019-16131020-16129341-16129342-16128547-16130049-16128871-145698325-49176370-16129723-16131059-16128063-226524697-90111180-16131387-16131740-16131740-16131294-345452718-345452719-90111685-16131916-16128809-16128810-16128790-16127995-16129338-16129018-16129017-16129927-16130814-90111685-16131916-16132115-16132114-16128705-16128718-16128706-90111507-90111685-16131916-16130939-16131389-16129308-16129309-16131740-16131316-16130756-16131034-90111144-49176442-16131747-90111238-16129650-16129338-16130107-16130108-16129388-16129387-16129011-16129876-16129010-16129875-16129876-16129390-16129875-90111081-90111144-16131019-16131294-90111155-16131020-16130887-16128844-16128843-16128605-16129390-226524725-90111347-16128258-16128614

CRS21 16128723-16132114-16132115-16130324-16130325-16131216-16131312-16131313-16131312-16131313-16130904-16130906-16132188-94541134-16132115-16132114-145698229-16128543-16131852-16128780-145698229-16128543-16129410-16129411-16129204-90111539-16128723-94541112

CRS22 16129919-16130199-16131653-90111175-16128807-16129846-16128737-145698233-16128924-16131639-16128843-16128844-16129631-16129919-16130703-16131152-16131153-16129863-16131152-16131153-16128694-16128871-16129103-90111238-16129390-226524725-16130096-16130801-16131030-16131740-16128816-16129814-90111347-16130049-16130095-16130964-16131030-90111561-90111603-16131852-90111679-16131873-16131970-16128815-90111158-16130430-16130708-90111158-16128628-16128628-16128815-16128816-16128988-16129100-16129123-16129226-16129227-16129452-16129559-16129561-16130205-90111413-145698292-16130331-16130584-16130671-16130939-16131226-16131227-16131295-16131296-16131314-16132134-16130672-49176377

CRS23 16128576-16129335-16129504-145698229-16128543-16130148-16131312-16131313-16130936-226524747-16128452-16128451-16128723-16129335-16129504-16128575-16128576-16128543-145698229-94541112-94541112-16129640-16129661-16132133-16131318-16130965-16130966-90111383-16130011-16130010-16128590-16128591-16129411-16129410-16128723-16128904-90111190-94541134-16132188-16130608-49176260

CRS24 16129123-90111440-90111144-221800782-16128026-16128604-16130187-145698288-16131455-16131456-16129123-16130780-16131736-90111685-16131916-145698346-16129919-16128481-90111655-16128133-16129676-90111295-49176138-90111728-16131127-16128528

CRS25 16128635-16128871-16131529-90111086-16128156-16131097-90111282-16129441-16129852-16130187-145698288-16130755-16128255-16128311-16129013-16130146-16130887-16130807-16131958-16129121-16129123-16130543-49176368-16131411-16131436-16131437-288551665-16129675-16131524-16131525-16128465-145698233-16128737-16129245-16128481-16128904-90111190-162135899-16129429-16130279-16130280-16128519-16130301-226524735-16128105-

16128106-16128554-16128555-16129165-16129452-90111440-90111495-16131389-16131935-16128778-16129511-16129855-16130341-16130757-16131318-16131736-16131836-226524721-90111429-16130392-345452722-49176263-16131049-16131050-16131050-16129242-16131049-90111726-16128271-16128272-90111214-16129075-90111476-90111372-16129959-16131202-16131203-16129463-16128611-145698252-145698339-16131856-49176170-145698334-16131382-16131383-16128988-16130158-16131238-94541127-16131473-16130768-16130499-16128012-49175991-90111154-16130186-16130429-16128602-16128988-90111407-16130428-16128156-16129411-16129410-16128611-16130430-16130751-16131935-16131458-16131294-16128258-90111238-16130835-16131653-90111690-90111691-16130952-90111184-16130368-16131529-90111121-16129102-16129102-16129102-16129102-16129102-16129102-16131337-16129101-16129101-16129101-16129101-16129101-16129101-16130801-16131336-16129295-16130818-16128961-16128962-16130672-16130671-16128740-90111355-16130867-16130168-16130225-16131331-90111193-90111631-16131535-16128604-90111214-16129075-16131524-16131525-90111645-16129452-16129901-16131295-49176479-16131296-49176480-16131627-16129072-16129204-16130684-226524742-16130396-145698299-16128604-16130620-16128022-16128209-16129852-16130580-16130581-16128213-16128675-16129335-16129406-16129504-16130119-90111452-16130900-16131366-16131689-16128212-16128265-94541101-16129459-90111316-16130306-16130901-16131367-16131471-16131688-49176489-16128595-16128302-16128303-16128534-16129020-16129622-16129819-16129855-16130153-16130168-90111476-16128025-16128266-16128527-90111321-90111348-16130512-90111692-49176480-49176479-16128582-16128605-16128843-16129100-16129102-16130176-16130504-16130867-90111084-145698220-16128417-16128469-90111144-16128583-16128844-16129101-16129429-16129447-94541112-16129658-16129755-16129927-16130022-16130175-145698293-90111440-16130505-16130608-49176260-16130747-16131101-16131258-16131331-16131382-16131383-16131498-16131736-90111695-90111702-16132117-49176017-16128468-16128779-16128952-16129093-16129100-16129633-16129608-90111389-16130710-16130814-16130939-16131314-16131849-90111703-16128657-90111187-16129079-16129633-16129632-16128670-16129003-16129631-16128904-49176133-145698342-16129151-16129152-16129500-90111305-16129930-226524732-16130597-16130807-16130978-90111575-16131365-16131488-90111663-16132090-16131339-16131340-90111163-16130659-16130660-90111137-16129020-16129349-16129745-16132130-16129348-16129744-16129855-90111363-16128300-16130187-145698288-16131316-16128026-16128205-16128206-16130745-90111183-16130844-16129041-16129478-90111361-16130780-16130829-49176489-16130272-16131387-90111568-145698229-16128543-94541112-16131767-16128315-16128316-16129017-16129018-90111291-16129493-16131074-16131819-16128373-16131418-16130696-90111286-226524721-90111083-16132220-90111084-16128986-16131852-226524727-16130439-16130738-16129632-16128670-16129003-16129631-16128904-49176133-145698342-90111190-16129620-16130492-90111084-16130825-49176156-16129954-16128602-90111154-16128635-16129444-16129003-90111379-16130007-16130240-16131104-16131202-16131873-226524703-16131203-90111679-16129076-16128920-16129167-16129168-16132060-16132134-16129973-90111641-16129304-145698281-16130152-90111476-16131104-16131495-16131736-226524713-16132177-90111155-16128659-157783150-90111611-16131903-16131912-16130129-16130230-16130130-16130231-16128639-16128675-90111214-16129217-16129419-16129495-16129501-16129624-90111383-16130272-16130296-16130965-162135908-16131597-16128106-16128650-16128674-94541101-16128871-16129075-16129216-16129496-16129946-16129946-16130297-16130966-16130974-16131011-16131155-16128134-16129020-49176377-16128073-16128154-16128203-16128657-16129179-16129339-94541111-16129612-16129613-16129759-345452722-16130780-16131436-16131437-16131825-16131934-16131935-16132062-16129180-16130275-49176263-226524759-49176450-16128543-16129075-16129488-90111361-16131152-16131308-49176377-16132186-16132202-16128164-16128540-145698229-16128662-16128663-16128843-16128966-16128967-90111214-16129123-16129165-16129294-90111286-90111289-90111310-16129601-49176170-16129969-16130204-145698297-16130430-16130751-16130988-16131104-16131202-16131203-90111581-16131274-16131275-16131307-16131498-90111645-16131609-90111651-16131718-16131755-16131775-90111680-16128694-16132040-16128755-16130859-16128264-16128468-16128481-16128602-16129123-16129123-16129622-226524721-16130275-16130275-16130504-16130608-49176260-16131411-16131794-16128469-90111154-16130049-16130505-16128448-16128682-90111492-16131626-16128425-16128447-16130084-16130620-16130722-145698331-145698220-90111122-16131710-16128148-16128715-16129348-16129349-16130707-16130708-16128147-226524711-16128007-16128069-16128203-16128462-16128796-16129345-90111264-90111286-16129562-16129595-16130144-16130158-16130703-145698336-90111663-49176474-16128008-16128795-16129100-16130230-16129342-16131238-16129341-221800779-90111085-16128203-16129100-16129683-16130049-16130956-16131049-16131050-16131217-16131380-16131415-16130957-16131504-49176415-145698340-16129341-16129342-226524713-16131411-145698312-16130801-90111364-308209621-90111410-16131959-49176343-49176361-90111244-90111245-16130093-16131217-90111186-49176377-16131970-90111147-16128527-145698231-16129146-226524731-16130591-16130594-16130602-16130967-145698310-90111643-49176479-49176480-16128513-90111147-16128515-16128638-16128669-162135899-16129211-16129293-16129676-49176138-16130078-16130079-16131843-90111701-16132012-16128239-16128604-16129630-16129736-16130551-16130696-16131536-16132134-16129737-226524715-90111388-16130052-16131104-16130187-145698288-16129675-16128904-90111190-16131019-16131020-16129702-16131340-16131339-16128630-90111277-16129672-16128631-16129413-16130887-16128591-16128636-16129076-16129472-16130292-16130306-94541127-16131473-16131892-49176479-16128417-16128481-16128590-16128822-16129471-16131063-90111603-90111684-49176480-16129570-49176125-16128721-16129017-16129018-90111363-16128722-90111730-16132186-16128007-16128012-49175991-16128502-16128906-16129020-90111209-16129101-16129102-16129123-90111238-16129294-16129338-16129572-16129616-16129676-16129806-16130272-16130608-49176260-16131076-90111557-49176329-90111609-16131892-16128008-16128501-90111155-16129029-145698270-16129650-49176138-16129805-16129814-90111363-16129975-16130113-16130745-16130887-49176302-16131034-16131077-16131117-16131387-49176426-16128239-16128602-16128952-16129159-



16129428-16129804-226524726-90111573-16131279-16131399-90111655-16128373-16128527-16128537-16128604-16128755-16128870-16129065-49176077-16129660-90111370-16131069-16131070-145698340-90111084-90111154-16128665-16128773-16129854-90111440-16131780-90111741-16129845-16129846-16130963-145698342  
CRS26 16131970-16131295-16131296-90111214-16129075-226524727-90111083-145698299-16130396-90111655-16129216-16129217-16128502-16128501-16131314-16130745-49176479-49176480-16130324-16130325-90111183-16131148-16130428-16131377-16130429-16129691-16130272-16129826-16131852-16128502-16128501-16129429-16130608-49176260-16129294-16130885-16130886-16128904-16128904-90111190-90111190-16131019-16131020-16128778-90111631-16131535-16129672-16130147-16131747-49176442-16132186-16129075-90111214-16128375-16128970-16128694-49176343-16132133-16129294-162135907-90111457-90111476-90111154-16128602-16130331-16131377-16128604-16131502-16128871-90111123-16128843-16128844-16129338-16130504-16130505-16128156-49176356-16129416-16129460-16130814-16132214-16132213-16130368-16129341-16129342-16131152-16131153-16128272-16130755-16128271-16131653-16128519-16128491-16131570-16128695-16128430-90111136-16129447-162135899-16129495-16129496-16130887-90111440-16131736-16130187-145698288-16129245-16129846-16129847-16131843-226524735-16128069-16128012-49175991-16128013-16128255-16130689-90111617-16129101-16128106-16128311-90111372-16131202-145698342-16129959-16131203-16130844-16128605-16128109-16128681-16129419-16131356-16129612-16129613-16129020-145698256-16129511-90111282-16129441-90111295-145698256-90111597-90111596-90111384-16130939-145698293-16128417-49176293-16131331-16128244-90111105-16128777-16128765-162135896-16129339-94541111-16130887-16131247-16131258-49176138-16129676-16129901-16131200-16130168-16128604-16129342-16129341-16132220-16128025-16131779-16129495-16129496-16132177-16129778-49176463-145698243-145698244-16131119-16130745-145698249-16131247-16131259-49176133-16130146-90111459-16129620-90111460-16128279-16132003-16129847-16130292-16129783-16131794-16131034-16131202-16130272-16131203-16129601-90111310-16128273-16128548-16131611-16131612-49176350-16128311-90111417-16131360-90111718-16128034-16129511-16128586-16128386-90111383-16131034-90111355-16130867-16131097-16130301-16131364-16131365-16128396-16130580-16130168-16130581-16129416-16128303-16128302-90111083-90111103-49176249-90111083-162135899-16131529-16129165-16130430-16130751-16131247-16131529-16131104-16131034-16132063-308209623-90111144-145698243-145698244-16129650-16129927-226524735-90111645-90111282-16129441-16130306-16130286-16128134-16129927-16128676-16129676-49176138-16131456-16131455-49176011-16128299-16128676-90111186-16130887-16128528-16131852-16128611-16128547-16130430-16130974-16129078-16129079-16130990-16132021-296044035-16129123-16131377-16127995-16130272-90111193-16128789-90111238-16128952-16130175-16130176-16129010-16131388-16129011-90111286-16131330-16131331-16129562-16129236-16131318-16131873-90111679-16128904-90111190-16131020-16128966-16128967-16129697-16128481-16131949-16130887-16129211-16129714-16129715-16131247-16131382-16131383-16128311-16130715-16128462-90111123-16129244-16131935-16129675-16131508-16132013-16129139-16129140-90111741-145698340-16129495-16129496-16130461-16128212-16128213-90111665-16131798-16130939-16129013-16128623-16129127-16128654-16128655-16129126-16129284  
CRS27 16130320-16130321-16130089-145698297  
CRS28 16131779-16131776-16131777-16128244-90111105-16131776-16131777-16128582-16128583-16129186  
CRS29 16131152-16131153-16131152-16131153-16131318-90111603-16131740-16129308-16129309-90111603-90111603-16129612-16129613-90111416-90111389-16131318-16131247-16130445-90111451-226524734-90111622-16130208-16131490  
CRS30 90111084-145698223-16128332-16128437-49176025-16128481-16128801-16128955-16128956-16128980-16128981-16129004-16130205-90111413-226524762-16128548-90111155-16129557-90111431-90111440-90111458-16131038-16131039-16131539-16131736-145698342-16131935-16127995-16128378-90111128-16128694-308209619-145698274-226524729-16128855-90111274-16129557-16131843-16131903-145698258-16129623-16129831-145698229-16128543-90111154-16128602-16129101-16130306-16130543-16131104-16131152-16131153-16131202-16131203-16131604-90111679-16131873  
CRS31 49176017-16128747-16131596-16128554-16128555-16131942-16130172-16129565-145698268-226524762-16132153-16131596-16128855-49176416-16128101-16128383-16128384-94541127-16131473-16128552-16130807-16131391-345452718-345452719-16131306-16130807-16128443-90111387-145698243-145698244-16129089-16129090-49176474-16128675-16129463-16129930-16130251-16128674-94541101-16130738-226524729-16131019-16131020-16131098-16129238-16129239-16131846-90111474-145698223-16128332-16128462-16131399-16128931-90111196-90111384-90111476-226524747-16130936-16131367-16128843-16128844-16129247-16131766-16128723-16130187-145698288-16130755-16131934-16131935-16130022-90111100-16130630-16128208-16129971-16131882-16128654-16128655-16129295-16129732-16129733-16130828-145698322-16128986-94541110-16131895-90111149-16128542-16130987-16128239-16129521-16128138-16130871-16130428-16130429-16131263-16131890-16130492-16129466-16128588-16131950-90111151-16128057-16128058-16130546-16132062-16129879-16130987-16130620-16129770-16129771-90111362-16129916-16129522-16128864-16128865-16128459-90111384-16131486-90111106-16128581-16130103-16132133-16128109-90111362-16129926-16131469-16128034-16129916-16131470-90111135-90111134-16128828-90111519-16131325-16127999-16128554-16128555-90111171-162135897-90111175-16128807-90111250-49176392-49176393-16131722-901111659-16131220-16129301-90111330-16130626-49176074-16128676-16132098-16128828-16129723-16131653-16129416-16131377-16129308-16130492-16131620-16130924-16130923-16130544-16128920-16130871-226524747-16130936-90111730-16128329-16129613-16129612-90111316-90111552-94541127-16129184-49176207-16131473-16130257-16128008-16128189-16129398-16128007-16129295-16130244-16130882-226524702-16131895-16131896-16128790-16129494-16128547-16128761-16130645-16128556-16129104-90111583-162135911-16130898-16129073-16132135-16130231-16130428-16130429-16131294-

16127995-16128212-16128213-16128694-16129452-90111492-16130722-16132030-90111519-16131416-16130504-16130505-49176441-16130219-16131495-16129072-16129557-162135896-16128563-16128765-16129124-16130723-16128233-16128584-16130696-162135914-90111624-16131860-16131861  
CRS32 16128980-16131765-16131766-145698229-16128543-16129338-16129630-16130587-16129140-16131274-16131275-90111153-16128915-16128914-16129615-16131216-16131217-16129852-90111631-16131535-90111497-16132003-16128747-16129458-90111316-16131794-16131238-16128822-90111407-16130186-16130771-49176302-16132188-94541134-90111106-90111316-16129180-16130275-226524759-16129179-16130176-16130175-16128311-16128871-16129020-16130522-90111465-16129335-16129504-49176329-16131117-16131217-16129858-90111454-16131427-16130962-226524724-16130894-145698281-145698288-90111083-16130187-90111497-16131217-16128241-16131356-16129863-162135908-16131019-16131011-16128547-90111103-16128604-16129929-90111655-145698346-90111555-16129759-16131023-16131024-16129927-16129781-90111339-16131596-345452722-49176263-16130780-16128096-16128097-16129861-16129160-16131942-16131259-16128543-145698229-94541112-16130914-16130887-16131279-16129558-226524758-16131010-16131549-49176463-16130175-16130176-16129447-16128731-16128474-49176140-16130945-16128459-16128473-16129294-145698276-16130946  
CRS33 16131884-16131885-16129139-16129140  
CRS34 16131470-16128655-16128654-16128443-16131469-226524726-16129854-90111739-16132176-90111494-16130749-16132089-16132090-16131279-16131280-145698279-16130518-90111206-16128034-16129854-90111739-226524726-16131470-16132176-16130814-90111489-16130682-226524699-49176425-16131680-90111544-90111088-16128117-16131937-226524713-16130780-16131469  
CRS35 16129988-16130633-16131852-16130632-90111276-16130967-145698310-16129885-16129884-16131105-16130225-16131155-16131653-16130168-16128203-90111286-16128845-90111182-90111331-145698243-145698244-16131970-16132195  
CRS36 49176308-16129854-226524726-16129863-16131470-16131740-16129365-145698224-145698254-145698282-145698306-145698309-145698344-145698342-16128896-16129310-90111642-16131202-16131203-16130708-90111137-16129360-226524741-16130643-16130428-16132219-16130429-16132218-16129146-162135899-90111326-16129633-90111568-16131030-16130591-16131379-16132200-16128501-16128502-16129933-16129284-16129919-16129452-16129852-16128610-90111557-16130988-16129301-16130987-94541130-16130698-49176425-16131680-16132002-16131104-16129166-16131837-90111743-16129123-16131101-16131680-49176425-16131126-16130042-16130069-90111743-16128747-16129253-16128264-16130341-16128659-157783150-16128366-226524726-16129854-16130587-16130939-16128706-16128749-16128705-16128748-16128657-16130492-16128489-16129971-16128488-16128520-16131049-16131050-16129854-226524726-90111679-16131873  
CRS37 16131028-16129575-16128633-16131023-16131024-49176401-226524732-16128809-16128810-16131023-16131024-16131028-16129723-16129363-16129937-16130763-16128417-16131024-49176398-16131023-16131806-16128543-16128543-16128623-16129805-16129806-16130273-16130273  
CRS38 16129238-16129239-90111167-90111643-16130094-16128639-145698299-16129198-16129482-16131320-16131319-16131488-145698262-90111495-16128843-16129774-16129294-16130396-16131279-16131280-16130552-16130620-145698346-16130319-16128203-162135894-16131508-90111145-16127999-16128295-16130604-16132054-16132055-16128721-16128722-16130042-16128107-16129226-16129227-16128502-16128501-16130591-16130977-145698321-16131653-90111718-90111131-16130022-16128560-16131392-226524713-90111484-16131337-16131336-16129087-16129520-16131700-16128143-16128871-16128481-16129572-90111718-16128053-16128270-16130739-90111695-90111391-226524746-16130088-16128639  
CRS39 16131325-16128555-16128554-16128984-16128849-16128848  
CRS40 16128022-16128032-16128209-16128214-94541100-16128650-16128665-90111173-16129013-16129041-49176170-16129999-90111384-16130069-16130825-16130859-90111523-16131134-16131134-16131325-16131415-90111642-16131595-16131755-16131775-16131782-16131842-16131842-16131863-16131933-16131933-16132145-16128308-16128308-90111117-345452717-16128701-16128828-16129985-16129985-16130082-16130170-90111452-16130719-16130978-49176343-16131593-16131742-16131742-16131742-16131859-16131880-16131894-16131922-16132002-16132059-16132081-49176045-16130257-16129642-16129252-16128878-49176107-49176330-16131415-16129093-90111609-16128055-16128055-16128055-16131324-145698339-16131856-49176368-16131411-16130376-162135895-16128668-90111384-16130170-16131059-16131970  
CRS41 16129345-90111264-16128706-16128705-16128705-16128706-16128488-16128489-16129847-16128367-16129846-16130368-16129652-16128109-16129653-16131104-16131203-16131202  
CRS42 16128034-90111316-90111081-16128264-16128582-16128583-16130608-49176260-16129444-16130743-16130742-16128134-16128904-90111190-90111209-16129029-90111603-16130807-16128865-16128864-49176302-16131653-16128586-16129676-49176138-16129826-16130119-16130430-16130751-90111173-226524724-16128547-90111158-16128628-16130095-16130096-16130974-16132133-16129721-16131316-16128984-345452721-16129076-16132134-16128570-16129378-16128116-90111087-16128375-16128528-16129455-16130939-16130885-16130886-16129675-16131994-16128540-145698256-90111310-16129601-49176329-16131117-16128106-90111435-16130360-16129663-16131815-90111684-16130771-16131115-16128832-16130152-90111167-16131588-16128502-16129511-145698342-49176017-16128501-16131314-16128212-16128213-16129165-16130430-16130751-16131740-16129845-16129846-16131736-16128109-16131498-16128212-16128213-16129348-16129349-90111378-16130756-16128291-16128650-90111603-16128989-16131949-16131531-90111286-94541128-16129702-16129715-16131247-16131529-16129714-16130272-16129185-16131794-16129186-16129294-

16129545-16128989-49176414-16130734-16129123-16131437-16130814-16131436-16129517-16129516-16129847-16131757-16128659-157783150-16128154-16129092-90111410-16131152-16131153-16131913-16130887-16129891-16130898-16131387-16129851-16129165-90111655-90111287-16129338-16130152-90111186-16130887-16128676-16130755-90111552-90111726-90111081-16130617-90111481-16130898-16128703-16130396-145698346-16131262-90111155-16128386-16129545-16131152-16131846-145698340-16132049-16131153-16132048-16132177-90111631-16131535-16130306-226524749-16130147-90111112-16128290-226524743-90111666-145698224-16129242-16129676-49176138-226524721-16130010-16130011-16130272-145698309-345452721-226524753-90111196-16128960-16128931-90111200-90111732-90111731-16130208-226524734-16131247-16129631-90111372-16129959-16131755-16131903-16130251-16131503-16131504-16128165-16128527-16130002-226524734-16131034-16131034-16131389-16131958-145698263-16130208-16129691-16130299-16131247-16130236-16130237-90111122-16128310-49176329-16131117-16130844-16131034-16129572-16132189-16132190-16130885-16130886-90111631-16131535  
CRS43 16128723-145698229-16128543-16128723-16128543-145698229-16128573-16128574-16131216-16129204-16131318-16129640-16129020-16130967-145698310-94541112-16128780-94541112-16131019-16131020-345452718-345452719-171701682-16129786-16129661-90111238-16129084-16132115-16132114-16131313-16131312-16129630-16128547-16132133-16128203-16132188-94541134-16132133-16130186-90111407-16128114-16132114-16132115  
CRS44 16128133-90111631-16131535-16128117-90111088-16129338-16130918-16130703-16130734-171701682-16129786-16129119-16129851-16128258-16129471-16129472-16131395-16128810-16128809-49176474-16130918-16129123-16130999-90111387-16129152-16128657-16131934-16131935-16128527-145698325-49176370-16131490-90111622-16129494-90111158-16128628-16128417-90111316-90111617-16130583-16131086-16131085-145698224-49176343-16129407-226524714-16129751-226524724-16129455-16131052-16131258-226524721-16128755-16130703-16129214-16130168-16129801-16129802-16130912-90111458-16132030-90111509-16129324-16128770-16131780-345452718-345452719-90111083-16129340-16128904-90111190-16128527-16131692-16131693-16131766-16131765-16130306-16130976-16128871-16129875-16129876-90111685-16131916-16131019-16131020-16132177-16128832-16129452-16130275-16128576-16129539-16128563-16128681-16131356-16130956-16130957-16131596-90111310-16129601-16129245-16131053-16128311-90111185-16128873-16132188-94541134-16130939-16129516-16129517-90111690-90111691-16129855-16128258-16130780-16129583-90111489-16130682-16131360-16129441-16128780-16129978-16128952-16130172-90111675-16131845-16128669-145698231-16128765-16132049-162135896-16132048-16128255-16128674-94541101-16128675-16128896-16128770-16129530-94541112-16128720-16131316-16128575-16128576-16130129-16130130-16131998-90111196-16128931-221800781-16129289-16132134-90111679-16131873-16130168-16130597-16128501-16128502-16130875-226524756-16131700-16129301-145698340-16128723-16128605-16131314-16130887-16131555-90111638-90111652-16131671-90111158-16128628-16128921-16131718-226524731-90111149-16128542-49176074-16130844-16129969-16132003-16130608-49176260-16131314-16132112-16129020-16128134-16131840-16130175-16130176-16130939-16128009-16128481-16130208-226524734-16130584-16130272-16128606-16129520-16131021-90111083-90111503-16130768-49176377-16129165-145698255-16129373-145698229-16128543-49176207-16128879-145698248-16129182-16128227-16128228-16130096-16130095-16130498-16130499-16128828-90111728-226524739-16129100-16129373-145698255-16131740-16131247-16131529-16131955-16128000-49176407-145698249-16132186-16130984-90111562-16131133-16130684-226524742-16131266-16128628-90111158-16128718-16129079-49176074-16131455-16129078-16131456-16131849-16131247-16128547-16131736-90111575-16128013-16129466-16131020-16131529-90111291-16129493-16128952-16131531-94541128-16130172-90111137-16131890-16128785-16130158-16131934-90111171-162135897-16129216-16129217-16130771-16129284-16131458-90111384-16128477-90111679-16131873-16130643-226524741-90111158-16128628-49176302-90111103-90111387-16131624-49176402-16131284-49176329-16131117-90111288-16129485-90111389-16129972-16129561-16132161-16132162-16131024-16131023-49176361-16129848-16129493-90111291-16129004-145698299-16130396-16128195-16128196-16130745-226524753-16130755-16131364-16131365-16129146-162135899-90111268-145698309-16130990-90111166-16129160-16131217-16130747-90111137-16130208-226524734-16128366-16128367-16128845-90111182-16129901-16131698-16131699-16129373-145698255-49176171-16131126-16131127-16130608-49176260-16132054-16132055-16129428-16129970-16128228-16128227-16131028-16129954-90111634-16129338-49176074-145698341-16131881-16131888-16131889-16132048-16129395-94541092-16130885-16130886-16131967-16131966-16129733-16129732-16130939-90111155-16128134-16129324-16128026-16129513-16131030-16129020-16130920-90111685-16130921-16131916-90111407-16130186-16131377-16131937-16132041-16132042-16129575-145698252-16131848-16131847-16130557-16131852-16131747-49176442-16130583-90111316-16129326-16129339-94541111-49176407-16130577-16130974-90111655-16131794-90111705-162135916-90111084-16131755-16130292-226524759-16131217-16128013-16128527-16128955-16128956-90111295-90111144-16131284-16131815-16129410-16129411-16131284-16130584-16131395-16128138-16128462-16128459-16131885-16131884-16130311-16130312-16129960-16129460-16130844-16128548-16128980-16130272-90111081-16128034-16131794-16129185-90111378-16128757-90111627-16131399-16128844-16128843-16128111-16128110-16128843-16128844-16131331-16130584-90111181-16131152-16131153-16131504-16131503-16130331-90111434-16129676-49176138-16129100-16129255-16131217-90111344-162135900-90111234-16131407-16131408-16131840-16128984-16128548-16128034-90111083-16130084-16130771-16128570-90111718-16131318-16131958-16128013-16128925-16128832-16128926-16129650-16129065-49176077-16130512-16128605-16128931-90111196-16128886-90111629-49176286-90111514-16129204-16128754-16131202-16131203-90111655-16131824-16131722-90111659-16131337-16131336-16130350-90111304-16129930-16131217-16131639-16131347-16128582-16128583-16130381-16129459-90111112-16128290-16128604-16131871-345452722-49176263-16128871-16128925-16128926-16129123-16129613-16129612-90111634-16130333-16130334-16130311-16130312-16131653-16128594-226524762-16129179-16129180-16131782-16129429-16131333-

16130368-49176329-16131117-16132134-16131023-16131024-145698220-16129308-16128424-16130441-16130823-145698331-16131626-16131356-16130793-16129545-16130513-16130428-16130429-16127995-16129971-16129646-16130320-16130321-16128989-90111293-16129525-90111112-16128290-16131197-16131504-16128465-16129541-16129540-16130583-16131104-16128373-16130400-49176011-16128299-16131385-90111320-16131242-16131243-90111688-162135908-16130999-16131932-90111379-16130007-16128366-16128367-16131852-90111180-16131387-90111440-16131039-16131038-16131740-90111165-90111294-16128045-16129697-16128986-90111415-90111440-90111361-16128026-16129658-16129659-16130095-16130096-16129338-16129569-16129338-90111645-49176177-16128684-16128685-90111361-16128273-49176267-90111293-16129598-49176129-16130825-16132048-16132049-16129949-226524721-94541109-90111114-16129335-16129504-16129556-16131331-16129119-16129852-16130835-16129804-16131217-16129059-16129619-49176035-16128564-16128694-90111184-90111643-16128755-16130147-16129554-16128681-16129553-16130755-16131259-16129231-16129658-16129659-16130505-16130504-16130371-16129794-16129795-90111622-16131490-90111702-90111703-226524761-16130360-90111435-16129702-16130272-16129335-16129504-16131284-49176071-16128979-145698345-16129100-16129160-16128611-16131049-16131050-16130882-16130924-16130923-16130368-16128026-49176156-16129578-16129579-16128938

CRS45 16129073-90111430-16129253-16130456-16131328-16130998-16130488-16131988-16129482-16128151-90111609-16129073-16129799-16130377-16130377-16130976-16130976-16131910-16130882-16128327-16132081-16128321-16128703-16129013-16130248-16130456-16130577-16131134-16131134-16131859-16128724-16130056-16129184-16130377-16130377-16129799-16130976-49176441-16128269-16128511-16131323-16131792-16129919-16131545-16129196-90111382-90111555-288551665-16129864-94541133-16128610-16129700-16129636-49176295-16131513-16129848-16130246-16128614-90111177-49176448-16131530-16129249-49176448-16128757-16128328-16130543-16131823-16128327-16128209-16128703-16129832-16130248-16130401-16130456-16130456-16130577-16131134-16129221-16128636-90111657-16128879-16130103-16128425-16128896-49176391-90111539-16129073-16131526-16130558-90111268-16128654-16128655-16128156-16129913-16130444-16131837-16128275-16128478-16128879-16131271

CRS46 16131888-16131889-16130858-16128920-16131889-16131888-16131627-345452716-16130518-16130686-16131813-16129658-16129659-145698236-16130915-16130978-16129954-16129146-90111679-16131873-16128074-16130340-16128279-90111244-90111245-16130930-90111528-16129390-16130713-90111702-90111703-90111184-90111375-16130357-49176459-90111242-16130042-16130720-145698226-90111238-16130172-16130631-16132113-16128061

CRS47 16128022-16128308-90111117-90111117-16130619-16130978-16128032-16128214-16128981-16130069-16131134-16131134-16132080-16131806-16128635-16131919-16131920-16129525-16128208-16128734-90111100-16128735-16131542-16128553-162135895-16129010-90111637-16130506-16130507-90111559-16128826-16131461-16128902-16131975-16130927-16131893-90111257-16128269-16130626-16131263-16131927-49176409-16130257-145698339-16131856-16128506-16128269-16131078-16128951-16131656-49176170-16131732-16129899-90111359-16128244-90111105-16131111-16131483-16131482-49176390-16128519-16128414-16129252-16131833-90111674-16129700-145698230-16130651-16130892-16129695-16130966-16131709-16131925-16128984-16130915-16130965-16130976-16131323-16131471-49176475-16128567-16128965-16128568-16130347-16128914-16128915-16128607-16129831-16128671-16131833-90111674-16130712-16128965-145698295-90111437-16128032-16130859-16131933-16131933-16131933-16128308-345452717-16131859-16129425-90111159-16131978-16131438-90111665-16129073-90111180-16131609-16130927-16132105-16131066-90111097-16131270-16129505-90111332-16129743-16128828-16130495-49176282-16131137-16130978-16130377-90111105-16128343-16128668-16130271-16132169-16128244-16131763-16128607-16130226-16130619-16130984-16128701-16128804-16128828-90111198-16129919-16129990-16130082-16130976-16131880-16131922-16128022-16128055-16128055-16128055-16128209-16128308-345452717-94541100-16128650-16128665-49176045-90111173-16128803-145698236-16129013-16129041-16129442-49176170-16129985-16129985-16129999-11384-16130170-16130377-16130377-16130377-90111452-16130456-16130577-16130719-16130825-16130859-90111519-90111520-90111523-16130976-16130978-16131134-49176343-16131324-16131325-16131415-90111642-16131593-16131595-16131742-16131742-16131742-16131755-16131775-16131782-16131792-16131842-16131842-145698339-16131856-16131859-16131863-16131894-16131933-16131933-16132002-16132059-16132081-16132145-16132199-16131928-16130782-16129424-94541116-90111198-90111657-16129234-16129235-16131927-16130651-90111176-16130426-16128610-90111637-16131919-16131078-90111131-16131281-90111238-49176475-16129424-16130798-90111103-16128260-16128668-90111203-94541110-16129762-90111336-16131274-16131275-16131598-16131627-16131863-90111683-16131058-16132113-16129224-16128663-16129665-16128662-16129665-145698309-145698267-16130036-90111385-16132070-161320219-16131920-16128588-16130976-90111151-16130377-16130134-16129558-16129224-16130383-16130506-16130507-145698221-16128950-145698344-90111255-16130738-16129280-90111256-226524729-226524730-90111176-90111381-16131810-16128769-16129655-16128491-16128568-16128817-16129721-16130894-16128567-16128818-90111493

CRS48 16128576-145698229-16128543-94541134-16132188-16128576-16129020-16128576

CRS49 16129020-16129338-90111280-90111389-16128417-90111214-16129075-16128547-16128723-16130965-16130966-16132188-94541134-16131765-16131766-16131503-16128396-16131504-16129807-16131279-16131280-16131312-16128258-16131313-16130742-16128553-145698229-16128543-16128723-16129700-145698279-16128143-16131020-16131313-16131019-16131312-16128574-16128573-16130745-16128452-16129204-16130130-90111675-16128451-16130129-16131845-16131316-16131104-16131653-90111173-90111509-16128681-16131356-145698258-90111274-16132186-16128573-16128574-16129857-16129856-16131903-16129373-145698255-16130504-16130505-16128192-16128193-16128848-16128849-90111277-16129413-90111684-16130324-16130325-16128904-90111190-16129219-49176249-16129452-90111316-145698306-145698333-49176463

CRS50 90111685-16131916-16128106-16128105-16130715-16130965-16130966-16130049-16128871-16128547-16129123-90111330-90111244-90111245-226524711-16131740-16131104-16129870-16129871-16130920-16130921-90111685-16131916-90111137-16131389-16130147-90111603-16130939-16130443-16129862-16129861-90111147-16128513-16130882-16128779-16131388-226524724-16131970-90111155-16129018-90111489-16129017-16130682-90111507-16129387-16129388-16129927-16130745-16131881-145698341-16132083-16132082-16128091-16128258-16132076-16132077-16131165-16130119-16131059-90111645-16128134-16130095-16130096-16130422-16129338-16131389-16128473-16128474-16129216-16129217-16129461-16129230-16129631-16129311-16131316-16130324-16130325-162135899-16129146-16128134-16132195-16130168-16128291-16130129-16130130-90111154-16128602-16130396-145698299-162135899-16130430-16131653-90111576-90111389-90111634-16131455-16131456-16131053-90111122-16128779-90111158-16128628-16131243-16131242-16129335-16129504-16129185-16129186-16128105-16131469-16131470-16132030-16129072-49176358-16130100-49176193-16128828-16131916-90111685-90111421-145698292-16128822

CRS51 16129236-90111583-162135911-16131591-16131736-16130737-90111741-16131387-16132133-16129217

CRS52 16132114-16132115-16130324-16130325-16128162-16128161-16130043-16128723-16130044-94541090-16128970-16128576-16129640-94541112-90111461-16130501-16130308-16130307-16128731-16131377-90111591-16129165-16129165-16129904-16129905-16128925-16128926-16128548-90111267-90111454-16131952-16131951-16130093-16129151-16129152-16129204-16131019-16131020-94541112-16129640-49176442-16128301-16131747-90111615-16131312-16128143-16131313-145698229-16128543-16128543-145698229-16128681-16128754-16129419-90111407-16131356-16130186-16130577-16130010-16130011-16130106-16128459-16130594-16131852-16131063-16132186-16130780-16131934-16131935-16130682-90111489-16130957-16130956-145698312-16128602-90111123-16129630-16130640-16130639-16130703-16130272-16128291-145698344-16131740-16132183-16129130-90111657-16130013-16131488-16131939-90111605-90111606-16129196-16128258-16131760-16131873-90111679-49176434-16131710-16128834-16128833-16131920-16131166-49176336-16131247-16130981-16131244-16132188-94541134-16131808-16131881-16128429-16132123-16128549-16128773-90111252-16129300-16131101-16132194-16129375-16130977-16128773-90111627-16129636-16130430-145698316-90111603-16128313-16128314-16128904-90111378-16129281-16129282-16130100-49176193-16132186-16128571-16129199-16129411-16131474-16128437-49176025-16129410-16131954-16129901-16128681-16132112-16131316-16128789-49176392-49176393-16129637-16132158-16130325-16131312-16128143-16130324-16131313-90111539-16131023-16131024-16130966-16130965-16131760-16128003-16131718-90111214-16130742-16129075-16130743-16129202-16131941-16129338-16129575-16130002-16132082-16131104-16131756-16132083-16129124-16131808-16130897-16132188-94541134-16129969-16130130-16129901-16130050-90111735-16131395-90111361-90111261-16129331-90111286-90111695-16131227-16131226-16130084-16128981-226524721-16128773-16129244-16128723-16129084-16129460-16130092-16131365-16130091-16131364-16129980-16130604-16129410-16129411-16128007-16128008-49176408-226524726-16129854-49176489-16131949-16130148-16132135-16128832-16129978-16130084-16129007-90111316

CRS53 90111214-16129075-16130732-16131806-16129433-145698260-16128715-16129125-90111276-16131552-16129730-16131076-16131077-16128570-16128581-16130956-16130957-16130299-145698334-16131240-16128681-16129312-16129419-16131356-16130966-16130965-16131609-16131266-16129562-16129831-16130923-16130924-16129211-16129387-16129388-16129631-145698297-90111494-16130749-90111602-145698279-226524751-16130524-16130002-16128279-16129237-16128875-16130230-16130231-226524720-16130602-16128844-16128843-90111125-16129630-16128364-16130999-16131934-16131935-16129875-16129876-16128778-16129982-16128551-16129488-90111289-90111286-94541101-16128675-16130388-16130389-16130010-16130011-16128167-16131852-16132158-16130056-16130473-16131382-16131383-16128343-16128004-16131244-16128386-16128695-16131958-16131793-16128257-16128213-16128212-16128073-16128674-94541101-16128675-16131722-90111659-16128878-90111476-16131046-16131047-16131104-16130084-16128163-16128279-16130272-16129870-16129871-16130939-90111121-90111144-226524702-221800782-16129861-16129862-16131105-16130583-16129054-16130445-90111451-16128548-16128828-226524737-16128445-145698339-16131856-90111627-16129553-16129554-226524721-16130744-16128012-49175991-16128952-16131030-16131740-90111728-16130885-16130886-16131389-16131837-90111237-16129213-90111552-49176358-16131126-16131127-16131524-16131525-16131202-16131203-16128718-16130091-16130092-16128734-16128735-16131153-90111494-16130749-16132123-16129973-16130422-16129494-16131795-16131796-16131011-162135908-16128124-16128125-16130771-49176276-16129004-16130187-145698288-90111676-145698279-16128161-16128162-226524762-90111646-49176400-16129576-90111196-16128931-90111587-16131282-90111331-16128570-90111513-16131325-16128252-345452715-90111509-90111510-90111684-16130977-16130514-16129977-90111711-16129698-16129552-16129077-16129008-16131458-16130825-16130439-16131223-16130756-16129583-16131706-16132041-16132042-16128212-16128213-16129022-16131486-16130843-16131094-16128654-16132202-16131316-90111305-90111484-90111182-16128845-226524720-16130304-16129952-162135904-16129861-16129862-16131949-90111214-16129075-90111225-16128300-16128779-16128034-90111081-16132040-16128105-16128106-16131892-16131399-16131890-16132133-16130069-16129086-16131736-16129064-90111438-16129552-16129898-16128526-16131486-16129804-16129914-90111575-16130584-16130747-90111643-16128547-16131852-16128013-226524713-16129903-145698309-16131970-16129511-16128809-16128810-16128400-16130597-16128893-145698350-16129926-16131034-16129124-16128302-16128303-90111244-90111245-90111383-16130026-16130707-16128290-16129367-90111112-90111631-16131535-16131388-226524732-49176293-16130999-16128668-145698228-16128462-16131488-16130603-90111205-16129732-16129733-16129078-16129079-16128034-90111081-16131879-16131860-16131861-16130745-226524703-90111561-16128142-16129981-16130418-16130419-16129125-49176489-49176377-16130667-16130546-90111724-16128547-16129691-49176401-221800782-16130168-90111403-16132176-90111739-16129969-16130825-16130324-16130325-16131063-90111474-16130707-16128724-16129904-16129905-16129301-16131364-16131365-16129130-

16128328-145698336-16131718-16131780-16131793-16129057-16128194-16128069-16128937-16131503-16129467-16130667-16129944-16130651-49176368-16131411-16128203-49176025-16132063-16128437-16130299-308209623-16132196-16130755-16128138-16130584-16129187-16129980-16128012-49175991-16129166-16129378-90111307-16131891-49176127-16130875-296044035-16129977-16132021-90111492-16130722-16129100-16129227-16129226-16128300-16129165-16131122-90111560-145698312-16131958-16130183-16131333-90111282-16129441-16128694-16129065-16131023-16131024-16132133-49176077-16129301-16131148-145698290-16131365-16131364-16130388-16130389-16130967-145698310-16128815-16128816-16129459-16130751-16130632-16130633-16131545-16128537-16130495-16130272-16130168-16129172-16129173-145698285-16130156-90111628-16130208-226524734-16131519-16128801-90111491-16132186-16130717-162135908-16128109-16129341-16129342-16131063-16131279-16131280-90111149-16128542-16130428-226524741-16130429-16130643-145698292-90111421-16131504-16128154-90111180-16130208-226524734-16130368-90111234-16129925-16129011-162135900-16130990-16132220-90111291-16129493-16131912-16129765-16129766-16131703-16129482-16130311-16130312-49176358-16128570-16132135-16130369-16129204-145698299-90111678-16131868-16130396-16130686-90111253-16129303-16130720-16129010-16129011-145698306-90111187-16128724-16130632-16130633-16128711-90111603-90111255-90111256-16129533-16130309-16130708-16130393-16130394-16131078-90111383-16130026-145698318-16129007-16129168-16129167-16129558-16130600-16130095-16130096-16128548-16131895-90111205-16131467-16131069-16131070-16130311-16130312-16130700-16130701-16131846-16132220-90111262-90111476-49176193-16130100-226524739-90111489-16130682-16130008-90111380-16128375-16129123-16131892-49176479-49176480-90111602-90111286-16131706-16129482-90111262-16129341-16129342-145698224-145698254-16129365-145698282-226524741-16130643-145698306-145698309-145698344-16128681-16129419-16131356-16131639-16130632-16130633-16128106-16128481-90111378-16130639-16130640-16129925-94541110-226524706-16128993-16129973-90111235-16130977-16128309-16130843-16130338-49176119-145698300-16131817-90111646-49176400-16128811-90111166-16131852-16129650-16130543-16130904-16130906-308209621-90111415-16131549-226524758-90111675-16131845-90111303-16128548-16131274-16131275-16128869-49176414-90111199-94541103-16130652-16132138-90111255-90111256-16128415-145698341-16131881-16129659-94541130-16128107-16128815-16128816-16129658-16131659-16129244-16130522-90111465-16129624-226524713-16128367-16128366-16131849-16128628-90111158-16130268-16128134-16129619-16128279-16128311-16129640-16130049-16128968-16130580-16130581-16131458-16131238-16132089-90111503-16130768-16132090-16128718-16128779-16128099-16129826-16128203-145698224-145698254-16129365-16129447-145698282-145698306-145698309-145698344-16129975-16131823-16131101-16130360-90111435-16129460-16130999-16132220-145698292-145698260-16129433-90111407-16130186-16129211-145698223-16128417-16128822-16129570-16132194-16128332-49176125-16131020-90111103-16129870-16129871-16131881-16129805-16132161-16132162-16128984-16130158-16128809-16128810-16131327-90111307-16128012-49175991-16128605-49176127-16131387-16131718-16130667-16131470-16130584-16131427-16131927-16130168-16128540-90111688-16129367-90111615-16131282-90111587-16132113-16127999-16129697-16128025-16131817-16131268-16131390-16131391-16131815-16129652-16129653-90111129-16128398-90111554-16131072-16131481-16131436-16131437-16128034-90111556-16130672-16130671-16128478-16131836-16131384-16131884-16131885-16128780-16129736-16129737-16128266-16129119-171701682-16129786-16129545-16130279-16130280-16129870-16129871-16130583-16130613-94541127-16131473-16129801-16129802-16131200-16131640-16132130-16128644-16128645-16128935-145698239-16128893-16129633-49176414-90111728-16128519-16128748-16130394-16131331-16128749-16129341-16129342-16130393-90111492-16130722-90111628-16131519-226524741-16130643-16131320-16131319-16131639-16130296-16130297-16128984-162135896-16128765-16129123-90111295-16129676-49176138-226524724-16128740-16128165-90111630-16130296-16130297-16131314-90111187-49176415-16129160-90111083-16128822-16130745-16129424-16128527-145698229-16128543-94541112-16130620-16130682-94541130-90111489-145698278-16132201-16130424-90111448-90111309-16130114-16130603-90111680-16131224-16129089-16130052-90111718-16129090-90111388-16128107-16129198-16131104-90111168-16128832-90111281-49176408-16130950-16130951-16129847-16128828-90111685-16131916-16130604-49176333-16130723-90111339-16129781-16128468-16128469-16130331-16128676-16129701-16130430-145698248-16129182-16131636-16129574-67005950-16129125-16130146-16130513-16130998-145698309-16131740-16131226-16131227-90111611-16129680-16129681-90111129-16131852-16128398-16128639-16129341-16129342-16129373-145698255-90111552-49176118-16130296-16130297-16132080-16128782-16128781-90111250-16130755-145698309-16130887-90111702

CRS54 90111476-49176025-16128437-49176293-16129732-16129733-16131949-16128417-16129561-16128659-157783150-16131126-16131127-16128854-90111363-16128417-16130153-16128763-16128896-16130976-162135898-16129099-16130049-16129086

CRS55 16129511-16129855-16129929-16130168-16128871-16129808-16129496-16129495-16128203-16128604-16130757-94541126-16131432-90111655-90111603-16130499-90111440-16130844-16128311-16129633-90111389-16130186-16131010-90111731-94541112-90111407-49176474-16132117-90111732-16129452-90111440-16131389-16131418-16131852-345452722-49176263-16129755-90111198-16129557-16129139-16130187-145698288-226524735-16128961-16128962-16132063-308209623-90111622-16132003-16128540-16131490-16130011-16130010-94541138-16129378-16129501-16130755-90111655-16128318-16129630-16132188-94541134-16130204-16131011-90111286-16130999-162135908-16131949-16130186-90111103-90111295-90111407-16131736-145698243-226524713-16129703-90111603-16131796-16132138-145698244-16129702-16131216-16131795-145698342-90111123-90111332-16131395-16129743-16130814-90111575-16131653-226524713-16129977-16129970-16131806-16128914-16128915-16131217-90111295-16130104-16130756-16131427-16128375-90111631-16131535-16131760-49176017-90111144-16128547-16128630-16128631-16128654-16128655-16129520-16130022-16130641-90111575-90111665-16131852-90111407-16130272-16130428-16128012-49175991-

16130186-16130429-16128657-16129615-16130391-16130967-145698310-16131935-16128481-90111489-16130682-16130835-16131416-16131143-49176358-16131117-16130747-49176329-16128755-16128543-16128602-145698229-90111154-16131104-16131498-16131609-90111083-16128813-16128814-16130301-16130461-90111497-16131217-16131395-16129187-16130158-16128705-16128706-16128781-16128605-16129100-16129755-16131110-16128747-145698310-16130967-16128681-16128755-16131356-16131771-16128034-90111081-49176017-16128528-16128605-16129460-16129658-16129659-90111575-16131314-16131799-16128906-90111492-16131104-90111663-90111440-16130439-16130722-16131942-145698342-90111361-16130974

CRS56 16128506-16131257-16129266-90111106-16130717-90111491-16130557-16131919-16130348-16131371-16131370-16128025-90111404-16130473-16129505-16130804-16131217-16131306-16131281-16131328-49176391-16128636-16131928-16128757-226524756-16130134-49176343-16130479-16128801-16130577-16131574-16129574-16128275-16131665-49176459-16132060-16128671-16128877-16130041-16131919-90111433-16128553-90111379-16130007-16128553-345452725-16129699-16129830-16129996-16130067-145698345-94541116-16129721-16130894-16129831-16130383-49176390-162135918-16131820-16131766-16128790-16128550-16129253-16128757-16130686-16132193-16131415-16128055-16128055-16128214-16128828-16130170-16130170-16130248-16130257-16131059-16131327-90111455-16131665-16129698

CRS57 16132213-16132214-90111293-226524739-90111155-16129340-16131958-16128773-16132188-94541134-16129630-16128452-16128451-16128576-16128373-16130843-49176011-16128299-16128255-90111303-16129064-16128703-16130114-16131019-16131020-16129065-49176077-16131970-90111255-90111084-16128656-16129478-16128575-16128576-16128900-16129630-16128318-16128348-16129640-16129778-16130224-16130441-16129855-16129854-16130011-226524726-16130010-16131202-16131203-16132188-94541134-145698229-16128543-90111287-94541112-90111562-90111433-16131133-16129244-16130258-90111418-94541126-16131432-16128548-16128208-16130682-90111100-16130123-16131935-16131495-16128258-16128315-16128316-49176474-16130898-16131046-16131047-16131816-16130755-16131710-16128966-16128967-90111121-226524739-16129455-16131101-16131314-90111626-16130692-16130693-16129530-16128106-16128773-16130093-90111128-16128378-145698274-90111310-16129601-16128279-90111154-16128602-16129011-16129633-16129166-90111631-16131535-16129410-16129411-16129736-16129737-16128705-16128706-16128790-16129101-16129102-16130324-16130325-90111550-90111665-16131887-16131097-16132068-16128734-16128735-16130824-90111627-16131760-16129978-16131653-16131387-16130432-90111183-49176311-16129204-90111269-16129382-49176418-16131104-90111575-16130747-16130999-16129460-16132220-16131104-49176293-16129846-16128839-16130396-226524748-16130965-16130966-16129065-49176077-16131979-90111694-16130096-16130095-16128501-16129122-94541134-16128502-16130520-16132188-16128567-16128568-16130231-16130923-16131391-49176497-16128435-16130924-16131390-226524765-16129419-16130745-16131387-90111454-90111701-16128255-16132012-90111494-16130749-90111344-16129848-90111575-16130999-16128893-16130424-90111448-16130614-16128748-16128749-16131942-16129387-16129388-16131970-16132186-145698224-16128740-145698254-16129365-16129452-145698282-226524741-16130643-145698306-145698309-16131342-16131343-145698344-16130147-16128607-90111444-16131747-49176442-16132035-16132036-16132188-16129100-345452718-345452719-94541134-90111375-16130771-16131892-90111305-16128871-16128937-94541107-16130897-16128575-90111375-16129500-16129511-90111121-90111181-16130687-16128789-16129308-16131895-16131155-16131896-16129739-145698325-49176370-221800781-16129289-145698255-16132200-16128488-16128489-16128654-16128655-16128723-221800781-16129289-16129373-16128291-16131653-16129236-16129863-16129455-90111684-16130835-16129017-16129018-16130522-90111465-16131857-16130153-16130462-16130463-16128740-49176402-16131624-16128425-16130757-16131544-16129768-16131504-90111157-16131503-16128705-16128706-16128778-90111250-16130428-16130429-16130945-16131384-16129702-16130946-16131104-16129165-90111503-16128604-16129345-90111264-16129569-16130084-49176361-162135910-94541107-226524725-90111347-90111690-90111691-16131836-16128154-16129855

CRS58 90111083-16130530-90111631-16131535-16131840-16129179-16129180-90111378-90111497-16131217-16128421-16130524-16129768-162135908-16130780-90111433-16130278-16128443-90111440-16132003-16128481-90111454-16131793-145698346-145698270-16129616-16131148-16129179-16129180-16128822-16128203-16130960-16130961-16131881-145698341-90111158-16128628-16130771-16128980-16129064-16129367-16129324-16127995-90111214-16129075-49176489-16129819-90111348-16128195-16128196-90111718-90111288-16129485-16128886-16128843-16128844-16129858-16130923-16130924-90111084-16131314-49176087-49176088-49176089-16129786-171701682-16132054-16132055-90111611-16128194-16131104-16131966-16131967-16128606-90111636-16129658-16129659-16128989-145698270-16129616-90111180-16128869-90111468-16131524-16131525-16129269-16129631-145698340-90111510-90111509-90111238-90111536-90111535-90111489-16130682-16129342-16129341-90111083-16129100-16129388-16129387-16129665-226524715-16130684-226524742-16129294-16129841-16129376-16131531-94541128-16130064-16130065-16128473-145698276-16128474-49176140-16129057-90111325-16129713-16130882-90111680-16130807-49176373-16131442-16128007-16128008-16128257-49176295-90111724-16131836-16131216-16128528-16128291-49176207-16129702-16130742-16129703-16130743-16131765-16129730-16128674-94541101-16128675-16131104-16128767-16128766-16132068-226524762-16129375-16128264-16128718-16130333-16130334-16131325-16131279-16131916-90111685-16128473-16128474-16130921-145698274-16130920-90111728-16128481-16129013-345452718-345452719-162135906-16130871-16129949-16128657-49176497-226524765-90111158-16128628-90111184-16131408-16131407-16130755-16129035-16129036-16129849-16131458-16129255-90111171-162135897-16131030-90111151-16128588-16131885-16131884-16129399-16132127-90111702-90111703-90111252-16131544-16129300-16131053-16128654-16128655-16130231-16130230-16129216-16129217-145698260-16129433-16130620-16128639-145698224-145698254-145698282-16130643-145698306-

145698309-145698344-16129365-226524741-16130880-16130879-16128723-16131813-16128896-16130107-16130108-  
16130242-16128465-16128633-16130124-16130125-16128468-16128469-94541118-90111399-16130745-90111083-16131217-  
16128794-16131177-16129160-16128012-49175991-16128952-16128156-90111728-16129003-16131050-16131049-94541109-  
16130147-16130175-16130176-16131356-90111361-16130702-16128279-16130163-16128570-16131873-90111679-16129556-  
16130069-90111652-16131671-16130780-16128537-90111253-16129303-16131217-49176358-16132038-90111707-16128092-  
16128396-16130737-16130584-16131334-49176170-16130923-16130924-16131504-16130168-16130168-16131598-16131880-  
90111561-16130175-16130176-16131890-16132170-90111622-16131490-16128668-16131305-16128156-16131238-16128822-  
16130939-90111121-16130275-16128105-16128106-16131155-90111156-16128962-16129387-16129388-16128961-90111310-  
16129601-90111154-16128602-16129387-16129388-90111494-16130749-16128527-16130430-90111581-16132089-16132090-  
90111370-226524728-16129244-16130504-16130505-90111522-16130867-16128295-49176343-16130319-16131275-  
16131274-16130306-16130430-16131486-90111114-90111286-16131949-16130339-16131065-16131916-16130338-90111685-  
90111568-16128008-16128007-16131896-16132177-16129494-145698252-90111137-16129452-90111316-16128040-  
16131895-90111497-16129057-90111246-16129265-16130306-226524711-16129301-16129447-145698260-16129433-  
16128602-90111154-16129420-90111266-16131967-16131966-16129644-16131935-90111552-16131934-226524761-  
16132161-16132162-16130071-16130070-16131488-90111084-16128857-16128807-90111175-16130619-16131486-16129150-  
16129149-16129919-16130546-16128944-16129563-16128227-16128228-90111155-16128966-16128967-90111268-16128134-  
16130580-16130581-16131536-90111209-16129029-16128674-94541101-16128675-16128564-90111154-16128602-16130275-  
16128156-16131296-16131295-226524765-49176497-16132087-16129806-16129805-16130738-16129123-16130022-  
226524741-16130643-16129513-16128547-16130430-16129004-16131498-16131455-16131456-16129335-16129504-  
16129102-16129130-16131760-16130296-16130297-90111309-16129660-145698256-90111429-16130376-16128458-  
49176489-16129697-16128564-16129804-16129187-16131970-16129916-90111362-16130324-16130325-16129854-  
226524726-16128147-16128148-16130946-16130945-16129884-16129885-16128012-49175991-16130371  
CRS59 16130965-16132188-16130966-94541134-16128576-145698229-16128543-16128258-16132188-94541134-16132188-  
94541134-16132115-16132114-90111675-16131845-94541112-90111448-16130424  
CRS60 226524762-16128217-16129841-16129739-16129759-16132099-16131974-16129511-16130150-16131119-16130825-  
145698281-16129042-16128534-90111321-226524711-16130584-16128694-16130338-16130339-16131065-16131890-  
16128203-16129367-49175994-16130075-16128674-16129662-16129934-226524761-16131498-16129929-16130306-  
16130977-145698345-16131712-16131712-16128058-16128057-16129378-16131482-16131916-16131483-90111685-  
90111433-145698340-16128639-16128271-16128272-16128570-16131307-16131308-16128676-16130349-90111428-  
16130269-16131108-16131109-16132000-16128026-16128594-90111235-90111262-16129501-16129520-90111343-16129927-  
16131172-16131819-16131172-145698260-16129433-16131890-16131458-16132003-16130885-16130886-16130064-  
16130065-226524746-16128596-162135897-162135899-16131011-16131536-16131244-16128295-145698224-16128676-  
90111163-90111171-16129146-16130724-162135908-16131019-16131377-90111274-49176282-16131851-90111133-  
145698258-16130530-145698331-16131626-16128968-16129616-145698270-16131148-345452722-49176263-16128473-  
145698276-16128474-49176140-90111274-16129441-90111730-16128657-145698258-90111282-16128989-16132099-  
16128988-16130309-16128527-16130512-16128396-145698230-16128026-16128407-16128408-16129805-16129806-  
16130348-90111726-16129076-16128435-16131765-16128912-16129496-16129562-16129757-16130657-16131823-16128004-  
90111159-16129326-16129495-16129863-16129121-16130224-16130602-49176401-16128151-16128636-16131932-16128321-  
90111285-16131048-145698334-16128488-16128489-16129335-16129504-145698276-49176140-16131782-90111665-  
90111476-90111611-16129205-16129783-16130967-16131395-90111429-145698310-16129079-16131856-16129078-  
145698339-16131445-16131446-16131963-90111568-16131470-145698331-16131626-16130272-16131916-90111685-  
16128224-16132042-16128223-16132041-16131988-16128357-16128990  
CRS61 16129511-16131294-16132208-90111747-16131104-90111743-90111083-16129123-226524721-16130585-16130168-  
49176257-90111384-16130771-145698274-16130617-90111481-16131591-16128773-90111384-16130312-145698331-  
16130311-16131626-94541090-16128970-226524719-145698230-16130844-16128854-16129303-16131944-90111253-  
16131945-16132177-16129127-16129126-226524725-90111347-49176077-16129065-16130311-16130312-16129539-  
16130965-16130966-16128203-16130335-16130336-16128547-16131030-16128034-16128271-16128272-16128364-90111125-  
16129072-16130430-16131294-16132202-16131526-16129211-16129244-90111428-16131765-16131766-16131857-16131463-  
16131464-16129130-16132202-90111427-90111100-16128208-90111123-16129378-16129700-226524724-16129794-  
16129795-16131140-16131141-90111280-90111389-16128315-16128316-90111122-16128481-345452718-345452719-  
16129650-145698341-90111253-16129303-90111360-16131395-145698340-16132220-226524762-90111122-16128817-  
16128818-16130350-16130430-49176350-16129558-16129559-16128481-145698229-16128543-16129441-16130698-  
16128755-16130430-16130751-16131677-16131678-16131843-16128723-90111103-16128585-16131591-49176479-49176480-  
16129659-49176293-16131765-16131766-16130010-16130011-16131653-16131703-16131704-16128694-49176351-16131101-  
90111389-16131390-16131391-16131364-16131365-16132082-16132083-16132183-16131689-16128805-16131688-16129100-  
16131770-16130835-94541127-16131473-16129004-16132220-16129244-16129511-16130169-16128822-16128073-16129934-  
16130400-16128443-16131951-16131952-16129093-90111489-16130682-90111079-90111122-16129338-16130172-16131892-  
16131284-16128843-16128844-16128773-16130119-16132000-145698346-49176377-16129981-90111495-16130429-  
16130428-16131780-90111214-16129075-16130272-16131247-90111617-16131529-16128012-16128013-16129583-90111629-  
16131879-49176479-49176480-16132197-16132198-90111382-16129805-16129806-16129978-16130580-16130581-90111299-  
90111300-16129495-16129496-16129619-16130518-16129101-16131284-16131387-16128573-16128574-16129101-16129102-  
16129102-16131034-49176401-16132026-16128227-16128228-16128914-16128915-16132195-16130708-90111268-16129410-



16129411-16130655-16132166-49176071-16128979-90111615-16131426-16131760-16128205-16128206-16128605-90111180-16131360-16129428-16130130-16128101-16128383-16128384-16128770-16128773-16129123-16129630-16131152-16131388-16131389-49176377-16131498-90111651-16128203-16128481-16129390-226524725-16130424-94541127-16131473-16131935-90111347-90111448-16131104-16129985-16129455-16130300-16131571-16129863-16129557-90111440-16131736-145698342-16130395-16129558-145698244-145698243-16129579-16129578-16131020-49176442-16132186-16128012-49175991-16129826-16130272-16130428-16130429-16130543-16131019-16131747-16131979-90111694-90111510-90111509-16131377-16129202-16131941-16131529-16130755-16130882-16131314-16130477-16131391-90111154-16128602-16130584-16131390-16130325-16131126-16131127-16130324-16128366-16128367-16130129-16128264-16128417-16128906-16129478-16128665-90111444-16130667-145698344-16128255-16128864-16128865-16129405-90111383-16130026-16130745-16131360-161235894-16130049-16131840-90111685-16131916-16128195-16128196-16131772-16131880-16132077-16132076-16128515-145698340-16132194-16130175-16130176-16132186-16131819-16130987-90111122-226524735-16131316-16128570-16129426-16130602-16132026-16132038-90111707-16131944-16131945-16130755-16128763-16130368-16130013-16128291-90111137-90111144-16128605-16129723-16129927-90111440-90111474-16131382-16131383-16131736-16128213-16132214-16131458-90111622-16131808-16131490-90111114-16128134-90111316-90111552-16131455-90111685-16131916-16132114-16132115-90111123-16129244-16131456-16131935-145698291-226524711-16128986-49176293-16131852-145698342-16128706-16128705-16128789-16130999-16131575-16130272-16130146-16129460-16129971-90111562-16131133-16131202-16131203-90111495-16128904-90111190-16129387-16129388-16129658-16129659-16129755-16130110-16130524-90111666-16128674-94541101-16128675-16130225-49176377-90111505-16130779-16131857-16131498-16128105-16128106-16129752-16131780-90111702-90111703-16130990-49176377-16129562-16128124-16128125-16131658-49176416-16131770-16129035-145698244-16129036-145698243-16129661-16128966-16128967-16128965-145698229-16128543-16129496-94541112-90111559-49176329-16131172-16129901-16128171-16128851-16128955-16129517-90111363-16131591-16131819-16128956-16129516-16129945-16131813-16129338-16131958-16130745-16130187-145698288-16130583-16131445-16131446-16129198-16131407-16131408-16129261-90111286-16128828-16129312-16128828-16128513-16130723-16131718-90111718-16128904-16130158-90111190-16131582-16131583-16129185-16129186-16130100-49176193-16128303-16131170-16131591-16131979-16128134-16128302-90111694-16129863-90111670-145698338-16128364-90111125-16129630-16131377-16131155-16131882-49176479-90111147-16129511-49176480-16130707-16129185-16129211-90111448-16131127-16129186-16130424-16131780-16131715-16130147-16131681-16131949-16128585-16130844-16131591-16131688-16131689-16130717-90111491-145698342-49176479-49176480-16132188-94541134-16128367-16128573-16128574-16129187-16130885-16130886-16130999-16131217-16131389-90111728-145698346-16130756-16129561-90111286-90111449-16130755-16131949-16128669-145698231-16128843-16128844-16129631-16129919-16129011-16131203-16131955-16129010-16131202-16131388-16131544-90111428-16128570-16130505-16131503-16128607-90111246-16129265-16129697-16130504-16131504-90111278-16129422-16131305-16128628-90111158-16128833-16128834-16128896-16130620-16128605-16130608-90111165-49176260-16129348-16129349-16129954-16128679-16128684-16128685-16129927-16128896-16130875-16131851-16131773-16131774-16130647-90111125-16128364-16128747-90111718-16131718-16131954-16130771-16129739-162135904-16129952-145698309-16128366-16128109-90111310-49176480-16128105-16128675-90111238-16129601-49176479-94541101-16129847-16130172-16128795-16128796-226524716-16132003-16128205-16128206-16129123-16129338-16129558-145698309-16131970-16129630-16129841-16130350-90111497-16131924-16130749-90111494-16129714-145698262-16129715-16132115-90111166-16129675-16130049-16132114-16128164-16129736-16130671-16130715-90111702-16128203-16129737-90111361-16130672-90111703-16132112-16130148-49176489-16127995-16130824-16128272-16128675-16129179-16129925-16128271-94541101-16128805-16129180-90111638-16128513-90111147-16129252-16131395-16130965-16130966-16130965-16130966-90111312-145698269-16130967-16129739-16129414-16129160-90111214-16129075-90111573-49176351-16128488-16128489-16131529-90111651-16128770-16131152-16129428-16130999-16128779-145698224-145698254-16129365-145698282-145698306-145698309-145698344-16129919-16131653-16128844-49176170-90111557-145698344-16128602-90111154-16130146-16131970-16131377-16131467-16132068-90111252-16129300-90111438-145698334-16128989-16128625-16128626-90111214-16129075-16131591-145698341-16131881-16130430-16130751-16128501-16128502-16128705-16128706-16128605-16128926-16129126-16129127-16129771-16130281-16130620-16130939-16128925-16129807-16129626-16129020-16129338-16131262-16128417-16128473-16128474-16129973

CRS62 16131951-16131952-90111547-90111548-16130668-16132070-16129367-16129557-16128590-16128591-90111489-16130682

CRS63 16129460-16130999-16132220-16129123-90111295-16130597-16128321-90111214-16129075-16130393-16130394-90111537-16131364-16131365-145698309-16128968-16128782-16129969-16131456-16131455-16130835-16131815-90111603-16129211-16130583-16128779-16130307-16130308-16129676-49176138-90111407-16130186-49176474-94541126-16131432-49176207-90111684-90111391-16130939-16129455-16128780-16129847-16128576-16130835-90111481-90111440-16130617-16131736-49176356-16131591-16128570-16132003-16132133-16131387-16131330-90111622-16131490-345452722-90111114-49176263-16128754-90111407-16130186-16130815-16128134-16130272-16129801-16129802-16131200-16130168-16130581-16130580-16129236-16128893-16129973-16131034-16131736-16130964-16131247-16129123-16128676-16129676-49176138-16129054-16130168-16129577-345452718-345452719-16130187-145698288-145698341-16131881-16130965-16130966-16129102-16131203-16131202-16130965-16130966-16129826-90111552-16128008-16128007-16128527-16129658-16129659-16130093-16130965-16130966-16130306-16131970-90111186-145698230-16129338-49176463-90111363-16129929-16131455-16129863-16131456-16131057-90111083-16129102-226524732-16128886-16128681-16131356-16129345-90111264-16130965-16130966-16129663-16130049-16130049-16131388-16130965-16130966-

16132202-16130814-16128684-16128685-145698256-16129261-16128605-90111295-16129308-16129309-16128303-16128302-16131148-16128984-90111147-16128828-16130835-16128605-90111277-16129413-16130546-16131490-90111622-16128773-345452718-345452719-16131996-16128548-16130393-16128519-16130394-16128321-16129387-16129388-16129459-90111123-16132135-16130401-16131049-16131050-16128915-16128914-16128407-16128408-145698344-16131442-49176373-16128311-16131200

CRS64 16128900-16129884-16129885-16131469-49176398-16129751-16128766-16128767-16130835-16131710-49176434-16129762-90111336-16129755-49176247-16129159-16131382-16131383-16129428-16130737-16129985-90111523-16130333-16130334-16130088-16131388-16131385-90111494-16130749-16131098-16128233-90111407-16130186-16128183-16128981-16129072-90111097-49176004-90111581-16128849-49176343-16128848-90111178-16129637-16130103-16131627-16128474-16128473-16130558-16130969-16130970-16128917-16131411-16131389-16128815-16128816-16128105-16131836-16131903-16129160-16128560-16128135-16129197-16129871-16129870

CRS65 90111743-16128192-16128193-16131202-16131203-49176377-16128738-16129414-90111489-16130682-16128548-16129017-16129018-16128300-16128928-16128929-16131227-16129460-16131226-16130522-90111465-90111657-90111321-90111389-16130912-16129826-16131806-90111286-16129557-16129630-16130587-16131704-16131873-16131387-16131703-90111679-16130672-16130755-16130671-90111121-16128950-16128407-16128408-345452718-345452719-90111102-16131857-16128481-16129159-90111242-90111497-16131126-16131127-90111096-16129854-226524726-16129660-226524751-16131506-16131542-16128586-16129929-16131074-49176414

CRS66 16130530-16130871-16132035-16132036-90111552-16131611-16131125-16131612-90111151-16128588-226524726-16129854-90111444-16131076-16131077-90111576-16130807-49176408-16128321-16128896-16128654-16130755-16128655-16130687-145698336-16129099-90111454-16130780-162135898-16131759-16131758-145698340-16131959-16129027-16129598-49176129-16129039-90111401-16128576-16128886-16130307-16130308-16129598-49176129-16130129-171701683-16130130-49176239-16129904-16131881-16129905-145698341-145698270-16129616-16129863-16130587-16131126-16131148-16128605-16129927-16130946-90111568-16131275-16131885-90111735-16129139-16130945-16131274-145698334-16131884-16130395-16131754-162135899-16129146-16129659-16129658-16129978-16130212-90111453-16131295-16131296-16128074-90111629-16131482-16131483-16131819-16128542-16128738-145698306-90111149-16129221-16132188-94541134-90111364-16131148-16128396-16128926-16128925-16130456-16131935-16129747-90111334-16130826-16128556-145698255-16129373-16129914-16128445-16128111-16128694-90111244-90111245-16130278-226524763-16128272-16130244-16131840-90111269-90111085-16129382-16128435-16130708-49176045-226524704-90111174-16129051-16129539-226524751-16131307-16131312-90111211-16131308-16131313-16128160-90111266-16129452-16130049-16130520-145698344-16128147-16128148-16128896-90111154-16131104-90111603-16131611-16128515-16128602-16131612-90111743-16128759-16128758-16130282-16131170-16132134-16128012-49175991-90111495-49176329-16131892-16129452-16131020-16131117-90111495-16130301-16131935-16131373-16131934-16131217-90111732-90111731-16129804-90111596-16131488-90111655-16131998-16128665-90111597-16128527-16129159-16129461-16131792-16131461-16129675-16131415-16132040-16128015-16128016-16128249-16128250-16128259-16128260-90111199-94541103-16129845-16129846-16131316-16132114-16132115-16132120-16128265-90111643-90111171-16129862-162135897-49176045-16128188-90111665-90111438-16129266-16129798-16129575-90111349-16130519-145698322-16131610-16128477-16129236-90111114-90111114-49176361-49176373-16131442-16132038-90111707-16128039-16131824-16131217-16128239-49176171-16131217-16129796-16131426-90111615-49176474-90111288-16129485-16130963-288551665-16129042-16128173-16129459-16131021-16130734-16128258-90111330-16131247-16128366-16128367-16129614-16130584-49176489-90111137-16131148-90111617-16130400-16130429-16130428-16129826-90111429-16130271-16129972-16129680-16129681-16128573-16128574-16128520-90111294-16130231-90111685-16132013-16130230-16131916-16128250-16128630-16128986-49176140-16130175-16130715-16130844-90111665-16131881-16128631-145698276-16129776-16130176-16132060-16129123-16130725-145698233-90111256-16131857-16128737-90111255-16129460-16129533-16129581-16131217-16131536-16128755-16129971-16130867-90111391-16131389-16131846-16131892-90111690-90111691-16128633-16131020-16131591-16128828-16129525-16130113-16130168-16130168-16128584-16128477-16130401-16131470-16131486-90111728-90111406-16129761-90111235-16130325-16128501-16129420-16130478-16128611-16130324-16128340-16128513-90111147-16129149-16129150-16129455-16131170-90111378-90111237-16129213-16131148-90111295-16127999-16128594-90111360-16130742-16130743-16129640-90111474-16131747-49176442-16130311-16131531-16130312-16130441-94541128-90111550-16128465-16129236-16129781-90111339-16129975-16130187-145698288-16130668-49176267-16131019-16131389-16131529-90111561-16131331-16130771-16131330-16130738-16131714-16131961-90111214-16129075-16129925-16130443-90111489-16130682-49176286-90111514-16130974-16131059-16131104-226524753-145698342-90111149-90111083-16128542-90111158-16128628-16129575-16130087-90111171-162135897-16129847-16130887-90111645-345452722-49176263-16128196-16131780-90111702-16128195-16129975-16131916-16131942-90111703-90111730-16131766-16129198-16131765-16129407-226524714-90111280-90111405-16130186-90111407-16129119-145698249-90111665-90111679-16131873-16131916-16128970-90111509-90111685-16129236-145698270-16129616-16130835-16131145-49176361-16131591-16131780-16129113-16129977-90111186-90111253-16130780-16130924-16131390-16129121-16129303-16129796-16130990-16131391-16128147-16128148-16129626-16129671-16130205-90111413-90111566-16131582-16131583-16130013-16131086-16129640-16131085-16128694-16129501-16131395-16129308-16129309-16129619-16129658-16129659-16130708-16131390-16131891-16131949-16131879-16129959-145698220-90111372-16128506-16128855-16129806-49176350-16129805-16129670-90111443-16128068-16128367-16129102-145698256-90111361-145698293-16130403-90111481-16130617-16130708-145698312-16131119-16132026-16128540-90111121-16128807-16129084-16129429-16130503-16131300-16131342-16131365-90111175-16129003-16129452-90111462-49176249-16131299-

16131343-16131364-16128007-16128008-16128147-16128148-16128367-16129211-16129376-16129378-16130113-16130393-16130394-16130476-16130477-16130742-16130743-16131202-16131203-16131364-16131365-16128324-16130966-16131389-157783149-16130965-16128463-16128464-49176361-162135897-90111575-16131435-16132056-90111122-90111171-16131552-16131575-16132057-16128654-16128655-90111083-16128258-16130175-16130176-16130543-226524726-16129854-145698318-90111681-16131887-16128096-16129513-16129864-16129901-49176377-90111703-16128097-16131469-90111702-16128614-16128722-16131305-16128721-16130441-16128501-16128502-16128636-16129034-16130152-16131920-16130599-16129179-16129180-226524732-16128234-16128280-16129990-16129990-16130605-16128528-16129139-16130962-145698258-90111274-16130094-16131893-16129703-145698338-226524721-16129702-90111455-90111670-16128676-16131011-90111622-16131524-16131813-145698341-16128026-90111440-162135908-16131490-16131525-16131881-90111728-16130638-16131633-49176282-90111084-16128952-16128970-94541090-16129676-49176138-90111363-16130755-90111557-90111561-16131482-16131483-16131882-16130316-16129064-16128556-90111167-90111130-16130168-16130826-16131034-16131448

CRS67 16128980-16128981-16128375-16131856-145698339-16130113-16128291-16131950-16128060-16130650-16129341-16129342-145698248-16129182-16130780-345452715-16128252-16128224-16128223-16132114-16132115-16128815-16128816-90111634-16131333-16131445-16131446-90111562-16131133-16131754-16129794-16129795-16129697-90111557-16128790-16128270-16128421-16128675-90111606-90111690-16128674-94541101-90111605-90111691-16130224-16129380-16129379-49176330-90111647-16128187-94541107-90111634-16129643-16129644-90111497-90111084-16129054-16128427-16131284-16130815-16128217-16129090-16129089-226524711-16131892-16128271-16128272-16128659-157783150-16129152-16129151-16130998-16132150-16132176-16131471-90111739-16130093-16128329-16130655-16128280-16128383-16128384-90111250-16129721-16129157-16129158-16129577-90111156-16130325-16128892-16130089-90111361-16129898-16129848-90111184-90111539-16131542-16131851-90111286-145698329-16130945-16130946-16129040-90111121-16132120-16128477-16131504-16131503-90111441-145698336-16128782-16131316-16131486-16131808-16131843-16129592-16129852-16131391-16128295-16128843-16128844-16129622-16130081-16131799-90111634-16131633-16129139-90111509-90111510-16129075-90111214-16131474-16130882-16128843-90111380-16130008-90111295-16129714-16129715-16128430-16128455-90111136-90111440-308209622-90111640-226524718-16130147-16128655-16130268-16128654-16132054-16132055-16131474-16129020-49176407-90111206-16128849-16128848-16128000-16131519-90111628-16129747-90111334-16128968-49176276-16128928-16128929-16128217-90111147-16130319-16131294-162135897-90111171-16132012-90111701-145698293-16131712-16129904-16129905-16128163-16129901-16130720-16129614-16129324-145698220-90111718-16130476-16128787-16128788-16129778-16130477-16130305-90111100-16128208-16129487-49176373-16131442-16131416-16129179-16129180-16129233-16129232-16130545-90111307-49176127-16128968-16128459-16131611-16131612-16129348-16129349-16131390-16130251-16129499-16128074-16128445-16128779-16130738-90111708-16132120-16128127-16128460-16128461-16131740-16128593-90111702-90111703-16131846-16128111-90111271-49176426-16128502-16128501-16128981-16128980-16129390-90111177-90111139-16129693-16129694-16130231-16128034-16131313-16131312-16129613-90111305-16129612-16128779-16131117-16129561-49176329-49176404-16129230-90111476-90111083-16128957-49176407-16129450-16130897-49176045-16129778-16130688-16128926-16128925-16129969-16129076-16131155-16128723

CRS68 90111246-16129265-145698260-16129433-145698345-90111631-16131535-16131111-16128417-90111183-90111675-16131845-16131294-16130583-16128415-90111627-16131155-16131011-162135908-16131364-16131365-16128534-16129622-90111503-16130768-16128570-16129631-16131119-145698340-90111246-16129265-16128264-16130049-16130504-16130505-16130278-49176295-16129065-49176077-16131722-90111659-16132219-16132218-16129506-16131678-16131677-16129339-94541111-16131063-16131382-16131383-16130224-16131806-16131503-16131504-90111316-16131736-16132186-16129973-16128604-16130584-49176377-16128266-16128734-16128735-16131331-16128828-16130823-16128982-16128122-16128258-16129972-16129020-90111509-16129852-16130601-16129906-16129240-16131774-16131773-16129065-49176077-16130022-16131048-90111672-16130278-16128864-16128865-16131840-90111703-90111702-16129433-145698260-16129851-16128519-16128054-16129885-16131949-16129884-16129927-16130296-16130297-16128914-16129615-90111153-16128915-16130332-145698306-16128193-16128192-16128257-16132134-16128755-16130129-16130130-226524752-16131935-90111181-16131934-90111583-162135911-16128864-16128865-16129225-90111481-16130617-345452718-345452719-162135906-16128203-16129838-16129736-16128138-16130129-16130130-16130604-16130751-16132166

CRS69 162135920-16130715-49176358-16130715-90111335-16129754-16131330-16131632-16131631-16129533-16132142-16132143-16128060-226524720-49176018-16130306-162135907-90111457-16128638-16131257-16130143

CRS70 16131028-16131023-16131024-16131023-16131024-16131806

CRS71 16131815-49176479-49176480-16128417-16128906-49176479-49176480-16128583-16130608-16128582-49176260-16129583-16131879-16128528-16129455-16130939-16129100-49176207-90111295-16131736-90111385-16130036-49176368-16131411-16129852-16130829-16131849-16130403-90111443-90111178-145698306-49176302-90111122-16128034-90111081-16128264-90111214-16129075-16131712-16128605-16129771-16130281-90111083-16129123-16129017-16129382-16129018-90111269-90111440-90111122-16129211-16128548-90111122-16128925-16128926-16129663-16129765-16129766-16128570-16129335-16129504-90111603-16129458-16130967-145698310-16128281-16128988-16129244-16131115-16130602-16130430-90111209-16129029-16127999-16130999-16131653-49176267-90111361-16128210-16132194-16129511-16130593-16131531-94541128-90111591-16130368-90111561-90111622-16131490-16129121-90111352-16129828-16129845-16129846-94541128-16129152-90111724-16131531-16131755-16129100-16129954-16130335-16130336-16130010-16130011-16128740-90111242-49176177-16130583-162135903-16130597-90111144-16129084-16130987-16130599-

16130988-16131030-90111557-90111316-16129126-16129127-16129047-90111210-16128628-16128980-16130974-16128981-16128547-90111158-226524753-16129245-90111158-16128628-16129858-145698342-226524739-16130591-16131161-49176293-16129338-16130602-16129407-226524714-16128989-16131736-16131770-90111448-16130424-16129390-16129697-16130320-16130321-49176293-16131392-90111476-90111154-16128602-16130584-16131294-16132208-90111747-16128271-16130152-16128272-16128571-16129525-16129755-90111211-49176414-16129051-16129870-16129871-16131455-16131456-16131591-16129010-16129011-16131202-16131203-16131388-16131498-90111079-16130606-16130049-16130505-16130504-162135903-16128515-145698312-16129516-16130384-16129517-16128605-16131242-16131243-90111361-16128547-16129495-16129496-16129631-49176401-16131935-90111684-90111147-16130476-16130477-16131314-16129075-16130272-90111214-16131247-16131529-16128469-16130835-16128468-16131200-16132099-49176407-16130505-16132035-16128375-16128527-16129378-16130504-16132036-145698322-16128134-16128904-90111190-16128843-16128844-16131970-16128773-16130324-16130325-16130715-16132000-16129168-16129167-16130473-16131364-16129460-145698279-16131365-16128898-16128899-16128871-90111287-16131247-16129338-16130152-16131588-16129123-16128989-90111713-16130352-16130353-16131455-16131456-16130978-90111575-90111629-49176398-16129553-90111701-16128255-16129554-16132012-90111449-16131364-16131365-90111165-16129338-16129568-90111666-16128465-16129805-16129806-49176392-49176393-90111190-16130429-16131887-16128904-16130428-90111681-90111679-16131873-16131757-16130540-16130168-90111655-16128481-90111158-16128628-90111123-16129237-90111332-145698312-16129743-16130545-90111568-16131780-16129646-16130306-16128266-16131955-90111083-90111144-16130022-16129855-16130641-16131935-90111631-16131535-16129203-226524730-90111381-90111676-16128527-226524731-16131773-16131774-16131836-90111184-16129165-16131598-16131838-16131839-16131903-16129975-16131954-16128721-16128722-16130299-16131411-16131640-90111147-16131011-162135908-16128839-16129972-16129211-90111114-16128574-16128573-145698230-90111384-16129516-16129517-16128526-16128955-16128956-90111155-90111458-16131860-16130146-16131736-16129452-162135916-90111705-16128526-16130187-145698288-16129650-16129862-16128205-16128206-90111083-16129633-16128164-16131703-16131704-16131481-16128567-90111361-16130158-16128302-16128303-16129123-16131436-16131437-90111489-16130682-90111190-16129981-145698345-16130998-16129517-16129516-16131028-16128034-16130667-90111433-90111562-16131133-16128012-49175991-16128156-16129973-16131295-16131296-94541112-16132026-16131588-90111087-16128116-16128635-16129101-16129102-16130013-16132099-90111220-49176207-16130964-16129104-16129558-90111416-16129375-16132134-16131161-16129324-16130430-16130755-16128586-16129511-16128625-16128626-16130095-90111154-16129676-49176138-16130096-16131153-16132133-16128602-16131152-16128828-16131957-226524719-16129511-16129127-16129348-16130747-16129126-16129349-16130049-145698263-16129245-16128801-16130887-16129511-226524725-90111347-16130168-16130580-16130581-16132213-16132214-90111474-16130939-145698291-16131122-16129160-90111560-16131379-16132177-90111361-16129376-16131836-16129659-16129664-49176017-16128501-16128502-16130275-16130771-16130814-16131314-16132134-16132134-16131916-16128481-16129660-90111685-16130659-16130660-49176329-16131117-49176392-49176393-16130148-16130858-16131808-16132112-16128491-16128007-16129501-16128008-16129242-16129339-94541111-16129429-16129855-145698309-16131030-145698344-16131590-16128856-16130308-16130307-16130771-16131944-16131945-16129630-90111622-16131330-16131490-145698340-16132161-16129122-16132162-16130275-16130599-16130844-90111163-16127995-16130010-16130011-16129539-16129970-16130146-16128675-16129703-16130743-16128674-94541101-16129702-16129852-16130742-16129216-16129217-16129461-16131631-16131632-16131316-16130620-16129294-90111416-16131816-90111718-90111277-16129413-16128279-16130735-90111193-16128773-49176301-90111286-16130261-90111563-16132150-90111186-16128378-90111128-16128586-145698274-16129759-16131023-16131024-16129324-16130734-90111157-16129295-16130106-16130659-16130660-16132089-16132090-16130477-16131390-16131391-16129739-90111679-16131873-16129187-221800782-16129691-16130844-16131529-16128718-16128770-16130430-16130751-16131591-16128069-16128970-94541090-16131367-16129675-16131366-16130552-16130306-16130939-16128527-90111214-90111634-16129075-16131034-16129444-221800779-16128864-16129661-16128865-16131295-16131296-16131458-16129101-16129101-16129102-16129102-16128828-16130505-90111474-16130504-16129925-90111685-90111428-90111617-16131916-90111743-90111163-16129410-16129411-16131279-16128844-16128537-16128843-16128013-16128012-16128386-90111378-16130807-16131427-90111438-90111532-16128012-49175991-90111121-16128203-16129511-90111728-16130639-16130640-90111246-16131049-16131436-16129265-16131050-16131437-16128561-226524729-226524730-16131030-90111381-16129697-49176377-16132090-16132089-16131653-16131703-16131704-16131591-16128654-16129919-16130424-16128655-90111448-16129020-16130780-16131101-49176351-16128669-145698231-16129852-16130172-16130923-16130924-16131316-90111703-90111702-16128923-16129612-90111111-16128922-16129613-94541101-16128805-16130672-16128675-16130671-90111491-16130717-16131011-162135908-16131779

CRS72 16129661-16128567-16128568-16128659-157783150-16128938-16128540-16131105-16130520-90111718-226524714-16129407-16129676-49176138-16132000-16128568-16128567-226524721-16129455-16129541-16129540-16128723-16129975-16131384-16129219-16128034-90111081-16128417-90111497-16130049-16128366-16128367-90111144-145698282-16129424-226524753-16131633-16130594-16129004-16129614-16129661-49176463-90111603-16130096-16130095-16128540-16128659-157783150-16131105-221800782-90111257-16129004-16129855-90111269-16129382-16128208-90111100-16128366-16128367-16130650-16128364-90111238-90111269-90111125-16129382-90111254-90111254-16131172-16131034-16128147-16128148-16132030-16128300-16129458-16132177-16128364-90111125-16131531-49176267-94541128-16129702-16131895-226524739-145698254-16129365-16130300-16130301-90111743-16129072-16128568-16128567-16129553-16129554-16129971-16129927-16128740-16128445-16130584-16131840-16129291-16129292-16130857-16128567-16128568-16129661-16128040-16130998-145698244-145698243-90111403-16129429-16128034-16131152-

16131153-226524741-16130643-90111739-16132176-16129072-16130084-16128012-49175991-16131387-90111444-  
16131887-90111681-90111316-16128573-16128574-16130999-16131217-90111087-16128116-16131356-16129879-16128780-  
16131591-16130885-16130886-16129237-90111511-16130812-49176377-16130395-16130084-90111084-16130824-16131316-  
16130169-16128227-16128228-49176377-145698229-16128543-94541112-16130999-90111084-16128437-16131387-  
16128095-49176025-16130208-226524734-90111622-16131490-16132133-16130269-90111622-16131490-90111190-  
16128904-16131873-90111679-90111455-16129122-16129539-145698276-49176140-16129545-16130887-16132026-  
16129324-16128367-16128789-49176474-16132109-16129428-345452718-345452719-16129676-49176138-90111739-  
16132176-16128570-16130175-16130176-16131427-90111702-90111703-49176087-49176088-49176089-16129826-16130799-  
16130800-16130684-226524742-16128904-90111190-16130632-16130633-16131217-16131052-16128723-345452722-  
49176263-16129335-16129504-16129556-221800781-16129289-16128192-16128193-16130824-16128481-16130657-  
16130871-16129428-16129626-16131795-16131796-16127999-16131392-16129583-16129613-16129612-16129093-16130205-  
90111413-16129650-16132114-16132115-16132188-94541134-221800782-16131105-16130643-16131077-226524741-  
16131076-94541126-16131432-16131873-90111679-16130745-16128970-94541090-16129017-16129018-16131104-49176358-  
16130924-90111286-16130923-16131949-90111250-16129640-49176442-16131747-16128527-16130147-16131318-16131958-  
90111147-16129378-145698309-90111125-145698254-16129382-49176137-16128364-16129365-90111269-16130684-  
226524742-49176358-49176373-16131442-16130208-90111180-226524734-16130745-16128501-16129429-16131843-  
16129562-16130632-16128502-16130633-16132114-16132115-16130594-16131411-49176368-16130844-226524713-  
16131202-16131203-16128481-49176074-16129179-16129180-90111268-16129691-49176401-16131740-16128833-16128834-  
16130999-16131934-16131935  
CRS73 16129845-16129846-16129856-16129857-49176045-16132134-16128504-49176045-16131633-16128656-16129925-  
90111421-16131817-145698292-90111083-16132076-16132077-16131955-16128291-94541128-16129561-16131531-  
16128291-16130081-16129494-90111186-16129326-16129658-16129659-90111305-16129801-16129802-16129838-16131458-  
16128576-16129540-16129541-16132000-16131570-16129972-16130965-16130966-16131416-90111605-90111606-16128748-  
16128749-16130049-16130049-16128607-16129540-16129541-90111378-16130150-16131327-145698340-145698220-  
16130175-16131942-16128654-16128655-16130230-16130231-90111454-16131440-16131773-16131774-16132134-16128105-  
16130176-90111427-16128761-16129301-16129737-16130441-16130815-162135920-16129736-226524738-16131148-  
49176358-16131653-90111308-90111288-16129485-16130522-90111465-16130756-16130977-16131148-16129553-16129554-  
16129680-16129681-16128528-16129572-16129360-16128724-16128777-16131244-16129467-16129737-90111670-  
145698338-90111568-16129848-16130671-16130672-90111679-16128311-16131873-90111252-16129851-90111171-  
162135897-16129300-16131526-16130557-16130875-16128630-16128631-16129935-90111379-16130007-16128828-  
16131659-94541130-16128383-16128384-90111384-16130418-16130419-16131415-16131775-16131863-16128311-90111180-  
16131069-16131070-16130330-16129003-345452718-345452719-16130002-16130613-16132040-16132199-145698262-  
16131824-226524726-16129854-16130350-145698341-16128310-16129424-16129622-16132186-16131671-16130734-  
90111652-16128590-16128591-16129367-16129557-145698297-16129472-16130106-16129471-16128016-16130205-  
16131959-16129985-16131395-221800782-145698262-90111413-16131765-16128917-16129233-16130144-16129232-  
16129804-16129898-145698346-16128013-16130394-16128817-16128818-16129862-16130393-16130591-49176343-  
16131299-16131300-16128904-90111190-16128906-90111557-16132048-16132049-16128060-16130396-16128382-16129378-  
49176171-16129977-16131388-16131633-16131837-16128547-90111307-16128321-90111164-49176127-16129721-16129901-  
16130292-16130652-16131108-16131109-145698318-16131961-16128564-16129539-16129615-16129978-90111387-  
145698312-49176425-16131680-90111665-16128464-16130584-16132090-16128463-16129583-226524732-16130388-  
16130389-16132089-16128755-16129978-16128012-49175991-16128481-90111149-16128542-16128590-16128591-  
162135898-16129099-90111294-16129747-90111334-16129972-90111631-16131535-16129049-16131591-16132117-  
16128462-90111214-16130175-16130312-90111495-90111629-90111703-16128650-16129075-90111286-16130176-16130311-  
49176267-16131849-90111702-16130279-16130280-90111147-16128258-16128348-16129102-49176170-90111415-16130322-  
16131653-16128258-16128271-16128481-16129455-90111378-90111387-16131776-16131777-16130131-16129973-16128195-  
16128196-16128695-16129204-16129862-16130350-16129052-16130306-90111121-16128366-16128367-16128586-16128694-  
16128855-90111253-16129303-16129378-145698256-226524753-16130333-16128152-16128153-16130334-145698256-  
145698331-16131626-90111121-16131469-90111642-16128068-16128705-16131436-16131966-16128706-16128839-  
16131437-16131967-16130217-90111509-90111510-16129003-16128833-16128834-16129501-16130107-16130108-16130707-  
16131221-16131555-16128425-90111310-16129601-226524721-16130645-16130739-90111638-16131274-16131275-  
16131738-16131247-16129151-16129749-16129152-16130594-16128654-16131119-16128272-16128655-16132197-16132198-  
16129452-16129675-16130095-16130096-145698299-16130396-16131342-16131343-16131659-16130230-16128106-  
16130887-16131722-90111659-16129301-16129831-226524742-16131776-16132035-16130172-16130684-16131777-  
16132036-16128488-90111494-90111552-90111685-16132013-90111083-90111121-16128489-16130749-145698336-  
16131916-16132135-345452718-345452719-90111295-16128681-16129863-16131356-16131954-16128548-16129970-  
16130703-16131316-90111718-16128017-16128018-49176074-90111629-16129652-16129653-16128165-49176368-16130153-  
16131411-49176414-308209620-16130999-16129141-16130723-16131712-16128364-90111125-16128659-157783150-  
16128938-145698254-16129365-16129373-145698255-49176137-90111344-90111389-49176358-16128227-16128228-  
16129419-16128570-16128593-16129348-16129349-16129863-16130147-16130430-90111450-16128637-90111326-  
226524746-16129565-145698268-16128527-90111383-16130026-16128007-16128310-16129380-145698274-16128143-  
16129244

CRS74 16130617-90111481-94541105-16128026-90111444-90111245-90111244-16129700-16130887-16130745-16130512-90111476-49176293-16132186-90111081-16128034-16131019-16131020-90111244-90111245-16132176-90111739-16130756-16128417-16130887-16129072-16128300-16129559-16129558-16131217-16129736-16129737-16130835-90111154-16128602-16130530-90111703-90111702-90111536-90111535-345452722-16129198-49176263-16131152-16131153-16131152-16131153-16128832-16130828-16128650-16130272-16129003-16130720-16131356-221800779-16131259-16129913-16128576

CRS75 16129024-16129545-16129236-16128989-16130400-16131085-16131086-16129799-16131959-16131387-90111158-16128628-16130751-16128871-16128321-16131104-90111476-16130875-16128034-16132220-16131838-16131839-16128537-16129751-16129862-16128556-49176088-16129702-16129703-16130300-16130301-171701682-16129786-16129244-145698346-16128570-16129640-16131740-16128133-16129121-16129072-90111316-16128843-16128844-16131837-16128604-16131153-16131152-226524746-16129047-90111210-16130272-16132120-16132080-16131488-16128501-16128502-90111247-90111622-16131490-16130689-16130690-90111643-16129826-16129495-16129496-90111730-16131078-16129072-90111316-16131767-16131294-145698309-16128291-16130205-90111413-16128203-90111361-1612135912-16131019-16131020-16130340-16130939-16129045-16129863-16131529-49176343-49176479-49176480-16127999-16130964-16131653-16128568-90111361-16128567-16128904-90111190-16131020-16131019-90111428-16129950-16130689-16130690-16129801-16129802-16128892-145698325-49176370-16131247-16131503-16131504-90111510-90111509-16130835-16128630-16128631-16131104-16132013-16129084-16131611-16131612-16130515-16130516-49176247-145698223-16128332-16128723-16130703-49176416-16131658-16131247-16130885-16130886-16128195-16129018-16128196-16129017-90111385-16130036-90111410-16130946-16130945-94541107-16131411-16130272-16130659-16130660-16129324-16130147-16130885-16130886-16131904-16128223-16128224-16128373-226524702-16131384-90111431-16131104-16130457-16130458-162135910-16129978-90111537-16129981-16128870-90111267-90111154-16128602-16128650-16131958-90111708-90111603-16131857-90111645-16130649-16131760-16130391-16130577-16129801-16129802-90111410-16128695-16129950-16129623-16130875-16131458-16131104-16131202-16131203-16128770-49176356-16128605-16130887-90111643-16130146-16131871-16131034-16131034-16129863-16130734-162135912-16132002-16131596-16131295-16131296-90111387-16130887-16128552-49176247-226524711-16130309-90111426-16131238-16127999-16129486-16131881-16131947-90111167-16130519-90111123-16128007-16128008-16128384-16128383-16131571-16132003-16132068-90111685-16131916-16128548-16131078

CRS76 16128650-16128575-16128576-16132030-16131446-16131445-16130152-16128291-94541127-16131473-16128675-16129049-16128674-94541101-16130123-16131458-16130153-145698258-90111274-16130930-90111528-16129087-16129367-90111303-16132081-16128631-16128630-16131959-226524700-16128007-16129342-145698342-16128008-16129341-16130670-16128004-16131153-90111612-16131420-16129604-226524762-90111246-16129265-90111123-16130990-16131427-16131777-16131776-226524739-16130371-16129407-226524714-16129691-90111203-90111269-16129382-16131244-16131698-16131699-16130513-16128054-90111288-16129485-16128527-16130103-16131763-16131843-16131742-16131742-16131742-16131894-16130477-16130653

CRS77 16131626-16128711-16129090-16129089-16130426-16131161-16130477-49176374-49176286-90111514-90111262-16130512-16128493-90111268-16129390-16131445-16131446-16129312-16131119-16129029-90111209-16131227-16131226-16130067-16127995-16129622-16128879-16128462-16128897-16131365-16131279-16131364-16128459-16128473-16130946-16128474-16130945-49176119-90111295-16131869-16131063-16130602-90111718-16131779-16130620-16131706-16130699-16131895-16131896-16131440-16131307-16128681-16131308-145698322-16128398-90111144-16131308-90111129-16128611-16131307-90111277-16129413-16130430-16130981-16131892-94541107-90111375-16129714-16129715-16131611-16131612-226524741-16130643-16130208-226524734-90111468-16130737-16129411-16129410-16131314-49176311-16131545-16129210-145698250-16131262-161320286-16128291-16129149-16129150-16130012-16131145-94541114-16129780-90111325-16130296-16129713-16130297-16130984-16130900-16130901-90111332-90111732-16129743-90111731-16130248-16131561-16130110-16129157-16129158-16130619-16130739-16131830-16132087-16131582-16131583-16131059-90111459-145698236-16130170-16130607-226524743-90111460-16128373-90111303-16131742-16131742-16129778-16128026-16128462-16129100-16130341-16129759-16129598-49176129-16130740-145698248-16129182-90111405-16132199-16131881-16129670-16130815-145698341-16129495-16129496-16129581-16130651-90111250-16130132-49176368-90111133-16130652-162135903-16129676-49176138-16130022-16130882-16129592-90111098-16128924-16128584-16128779-16130050-90111326-16130230-16130231-16129140-16130198-49176446-16131787-90111503-16129198-16128564-49176035-16129699-16129851-16130082-16130093-16129395-16128504-94541092-16129701-16130152-16128724-16130797-16130349-90111303-16130796-16129121-90111486

CRS78 16128447-16128448-16130945-16130946-16128396-16128552-16128447-16128448-16128026-145698270-16129616-16131331-16128105-16128106-16131598-90111134-90111135-90111700-16129004-16130818-16132041-16132042-16128417-49176489-90111098-16130108-16128167-16131148-16128855-16129466-16131312-16130815-16131172-16128105-16128106-90111702-90111703-16130309-90111426-16130208-226524734-90111190-90111544-16129452-16129376-16128468-16128469-90111716-16129516-16129517-16130110-16130504-16130505-16131486-90111385-16130036-16131846-16129675-90111307-49176127-16129848-16128928-16128929-16128626-16128625-16128585-16130540-16131074-16131734-16131735-16128194-16129804-16130278-16130631-226524743-16128615-16131794-90111726-16128188-16130443-90111641-16129849-90111622-16131490-49176087-16128844-16130907-16129308-16129455-16128478-16129796-90111576-16131926-16128471-16130580-16130581-49176311-16128920-90111244-90111245-16129520-16128001-16128002-16129420-16129851-16130522-90111465-16129390-16128302-16128303-16128851-16129558-49176119-16129724-16129495-16129496-90111495-16131884-16129604-16131885-145698318-16130990-16128537-16128537-90111155-16130583-16130078-16130079-

49176442-16131747-16128604-16128321-16128114-16130666-16130844-16132114-16132115-16131143-16128893-49176415-16132082-16132083-16128610-16129078-16129079-16129184-16128386-16131904-16129848-16132098-16129847-16130119-345452721-90111739-16132176-16129557-16130798-16128060-16130707-16130546-16129736-16129737-90111308-16131101-16131843-16129852-16131078-16130026-90111383-16128809-16128810-16129739-16128718-16129202-16131639-49176416-16131777-16131658-16131776-16128675-16128203-16128674-94541101-16131824-16128119-16128120-16131584-16131365-16131364-16129770-16129771-16128961-16128962-16128966-16128967-16129171-288551665-94541130-16130740-145698344-90111552-16130522-90111465-16129089-16129090-16130070-16130071-90111713-16128233-16128749-16128458-145698322-16128291-16130324-16130325-16131299-16131300-16128552-145698258-90111274-16131368-49176416-16131658-16131937-16131257  
CRS79 16130632-16130633-16130620-16129072-16128548-16128537  
CRS80 94541112-16128576-16128543-145698229-16128576-145698229-16128543-16132188-94541134-16132115-16132114-16132188-94541134-16130093  
CRS81 16128224-16128223-16130507-16130506-90111220-16131693-16131692-16131966-16131967-16129173-16129172-16130300-16130301-16130183-16129405-90111394-90111395-16130929-16131710-162135895-16128459-16129495-16129496-16130966-16130965-16132204-16132205-16128462-16129388-16129224-16129387-16132041-16132042-16130898-90111131-16129160-90111370-90111112-16128290-16132056-16132057-16128422-16130225-16131513-16128147-16128148-16129743-16131166-90111332-49176336-16130403-90111443-16129927-221800780-16132197-16132198-16131392-145698322-16128279-16129805-16130158  
CRS82 16129020-16129719-16129720-16130022-16131023-16131024-16131542-49176392-49176393-16128843-16128844-16129879-16130300-16130301-49176293-90111622-16131490-16129919-90111520-16131134-16131134-16128650-16130715-49176414-90111672-16131939-16131949-16128515-94541092-16129395-90111544-16131732-16128654-16128655-162135896-16128765-16131063-16131119-16131692-16131693-16131862-16130796-16130797-16131126-16131127-16131392-145698322-16128855-16128856-16130108-16131049-16131050-16131076-16131077-90111679-16131873-16132114-16132115-16130391-16131416-16131903-16128279-16129179-16129180-16130113-16131366-16131367-16128110-16128111-16128527-16128564-16128656-16128897-16128904-16129242-16129572-16129805-16129806-90111407-16130186-16130300-16130301-16130512-345452722-49176263-16130735-90111516-49176293-90111552-16131330-16131470-16131934-16131935-16130091-16130092-16128780-16129875-16129876-90111407-16130186-16130368-16130512-16130894-90111544-90111163-16129284-16129511-90111321-16129759-16130666-90111568-221800782-162135916-90111705-16130929-16131596-16131609-145698336-90111677-90111100-16128208-16128575-16130441-16130630-16130825-16128034-16129013-16129626-16129652-16129653-90111326-16130897-16131294-16131849  
CRS83 16130395-16129739-16129863-90111083-145698243-145698244-16129751-16128723-90111497-226524700-16130445-90111451-94541134-16132188-16130168-16131747-49176442-16129863-90111581-16131391-16131390-16128955-16128956-16129244-16129700-90111550-16128815-16128816-16131262-16128138-90111389-171701684-16131849-16128049-16128048-90111665-16130147-16129301-16131653-226524748-16131779-90111276-145698306-16129216-16129217-226524704-90111174-226524711-16128265-90111631-16132038-90111707-16131535-16132025-90111413-16131247-94541107-16131445-16131446-16128012-49175991-16131653-90111622-16131490-16128829-16131942-16129652-16129653-16129876-16129875-90111631-16131535-16131935-16131934-16130844  
CRS84 308209621-90111083-16128626-16128625-16129826-90111286-16128417-16128417-90111563-16128264-16129664-16130633-16130632-90111622-16131490-90111183-16131200-16130651-145698233-16128737-16129583-16129312-16130885-16130886-16128674-94541101-16128675-16128007-16128008-16130306-16131879-145698331-16131626-16129380-49176107-16129379-16130814-90111444-16131970-49176326-90111561-16131795-16131796-16129959-90111372-16131935-90111407-16130186-16131161-16128681-16131011-162135908-16129123-16128924-16131388-16129428-16129826-16129736-16129737-16128084-16131653-16129411-16129410-16128239-16128241-16132186-16130751-16130530-16129419-16128988-16128473-16128474-16130939-90111695-16129216-16129217-90111665-16130175-16130176-16131427-16131970-16129691-16128925-16128926-16128373-16129072-16132134-16129631-16129463-49176207-49176343-16131871-16129981-345452718-345452719-90111214-16129075-16128513-90111147-49176458-16128871-16128547-16131049-16131050-16130751-16131217-16129419-16128795-16128796-16130079-16130078-16129018-16129017-90111679-16131873-16129852-16128650-16130657-16130918-90111154-16128602  
CRS85 16130049-16130504-16130505-90111680-90111154-16128602-16130584-90111665-16131049-16131050-16128258-16130667-90111361-16131740-16131896-16131895-16128105-16128106-16131780-90111154-16131306-16128602-90111305-16128255-90111701-16132012-16128515-16130002-16128255-16130506-16130507-16130010-16130011-16130882-16128611-16128828-90111685-16131916-90111214-16129075-16129626-16128105-16128106-90111702-90111703-16130002-16131467-16132068-16131126-90111277-49176329-16129413-16130244-16131117-16131202-16131203  
CRS86 16130587-16130587-16130652-16131548-16128318-16128318-16128318-16130652-16129304-16128069-16128654-16128655-16130520-16130512-16130577  
CRS87 16130828-16131330-16131331-16130281-16131330-16131331-16129693-16129694-16129804-16129776-226524730-90111381-16129249-16131775-16130591-16131552-145698247-16128018-16128017-16131359-16128874-90111084-49176035-16128564-16131780-90111316-16129934-145698339-16131856-16132089-16132090-16130424-90111448-16132134-16131328-226524700-16129545-16129637-16130262-16128194-16129545-16130433-16130434-16131382-16131383-16130079-16130078-16131836-49176480-49176479-16128870-16130657-145698239-16128935-16131959-16131903-16129167-16129168-16130591-16131392-16131744-16131745-16128986-16128046-16128357-16128990-16129960-16130591-49176391-16130143-16128898-226524706-16129620-16130594-16131034-16128899-16128993-49176133-

90111335-16129754-90111557-16131596-145698274-16128458-145698322-16128593-16128779-16129182-49176479-145698248-90111429-49176480-16128519-90111677-16128550-16129652-16129653-16128099-16129171-16129087-16130428-16130429-16131850-90111267-16131890-16129211-16131148-16130432-16130236-16130237-90111337-16131751-16128111-16130064-16130065-16130671-16130672-90111293-145698348-16130281-16128196-16128195-16129253-16131274-16132162-16131275-16132161-90111084-16128194-90111103-16128676-16129338-16130179-49176249-90111681-90111474-16129116-90111151-16128588-16130857-16128740-90111178-16129119-90111454-16129078-16129079-16130333-16130334-16128165-16129204-16129692-16129211-16131333-16130814-16128679-90111435-16130360-226524759-16132177-16128611-16130998-16129802-16131268-16128855-16128856-16130272-90111474-16130723-16131382-16131383-16129801-90111588-16130988-16130242-16130987-16130914-49176356-16131961-16128639-16129348-16129349-16130002-145698334-16131857-90111152-16132170-16128437-49176025-16131666-16132195-16130146-16130998-16128773-226524737-16131068-16130338-16130339-16128458-16128871-16129933-16129933-16130262-16130289-226524743-16131578-16131658-90111683-16131268-16131303-157783152-16131515-16132134-16131939-145698229-16128543-16129086-90111430-16131161-16129455-16130219-16131307-16131308-145698279-16129832-16130799-16130800-16131571-90111335-16129754-16128703-16130619-16130999-16131760-16129121-226524725-90111347-145698342-16131958-16131706-145698228-16130518-16130123-16131925-90111082-16128986-16129121-16129298-16129670-16130311-16130480-90111458-145698310-49176343-16128665-16128917-49176170-16130825-16130967-16131471-16131782-16128548-16130929

CRS88 16131885-16129826-16131884-16128584-16129237-16131703-16131704-16130887-16131152-16131153-90111378-16131152-16131153-16128295-16129140-16129139-16129661-16131034-16131837-90111707-16131653-16132038-16128807-90111175-16129969-16131202-16131203-226524719-16128766-16128767-16128194-221800779-16130224-16128832-16132068-90111563-16131852-16131034-226524753-90111739-16130667-16132176-90111444-16128515-16128681-16129419-16131356-16128042-16129545-16130430-16128966-16128967-145698258-90111378-90111274-90111083-90111295-145698252-16130956-16130957-90111677-16131458-345452718-345452719-16128722-16128721-16131259-16131740-145698344-16129927-16130583-16129583-16130049-16131053-90111612-16131420-16131365-16131364-16132176-90111739-16129630-145698299-16130396-90111695-16129861-16129862-16132220-226524713-16131455-16131843-16129245-94541109-16131456-90111679-16131873-16128548-16131388-16129165-16130430-16130751-16131247-16131247-90111617-16131395-16129455-16129237-90111631-16131535-90111079-16130281-90111182-16128845-16130745-145698300-16130583-161328611-16131840-16131639-16128193-16129429-16129984-16128192-16131823-16131373-90111122-16129563-16130875-145698344-16128213-16128212-16128018-16130796-145698309-16128017-16128988-16130797-16130306-226524749-16128203-16129185-16129186-16131284-90111383-145698336-16130026-145698233-345452718-345452719-90111444-221800782-16131247-16128737-16129676-49176138-16129826-16130584-16130166-16130167-16129020-16129049-16129414-16129927-90111389-90111489-16130682-221800782-16130667-16128749-16129146-16128748-16128540-145698256-90111310-16129601-16128528-16130319-16129119-16131021-16128922-90111277-16128923-16128968-16129413-16129179-16129180-16129637-16130231-90111622-16129950-16130147-16130230-16131490-16129375-16131948-90111363-16131776-16131777-16128445-16131941-90111603-16129545-16130887-16128203-90111561-90111678-16131868-145698331-16131626-16128134-16129373-145698255-16129713-90111325-16129458-16131079-16130331-16131703-16131704-16131795-16131796-16129935-16129913-90111497-49176301-145698336-16128527-16128685-16129919-16130049-16130584-16131314-16131653-16128684-16130049-90111552-16131611-16131612-16129460-16129901-16131873-16128241-16129455-16131217-90111679-16131970-16131740-16129702-16129338-16130604-90111563-16128425-16129863-16131391-16132120-16128133-16128266-16128748-16129308-16129309-16131390-16128407-16128408-16128528-16129017-16129018-16131869-16128573-16128574-16128828-16129187-16130999-16131740-16128989-49176356-16128396-16128703-16129455-16130148-16131216-90111629-16132041-16132042-16132112-308209621-16131903-90111389-16131384-16128032-16128989-16129349-16129598-49176129-345452721-16130734-16128462-90111165-16129348-16131318-16131780-16128694-16131479-16129981-16131848-16131847-16129747-90111334-16130639-16130640-16129041-16128925-16129126-16128926-16129771-16129127-16128548-16129517-16129516-16130584-16129303-90111380-90111253-16130008-90111389-16130026-16131152-90111383-16131153-145698336-145698342-16128864-16129616-16128865-145698270-16129702-16131148-145698336-145698338-16132060-90111670-16128430-90111136-16128162-16128459-16129057-16129969-49176373-16131442-16129539-16128946-16132204-16132205-90111123-16129244-16131456-16131935-49176479-16129697-16131200-49176480-90111741-16128203-16131455-90111701-16130745-16130939-16132012-145698236-16129211-16131772-16131793-90111681-16131887-90111307-49176127-16129521-16129846-16130835-16128993-16130602-16131385-16130334-16131382-16128548-16129846-226524732-16130333-16131383-90111474-16128576-16129545-90111416-16130400-16130734-16131947-90111603-16130278-16130835-90111214-16129613-16130306-145698342-49176480-16128789-16129075-16129612-49176479-16128034-90111081-90111244-90111081-16128528-90111245-16128143-90111352-16129828-16130757-145698336-90111155-49176170-16131954-16128548-16129562-16128034-16129284-16130169-49176329-90111708-16129724-16131117-16130503-16129752-90111462-16128855-16128515-16129495-16130524-16129496-16130771-90111581-16129331-90111261-16128143-226524724-16131765-16130558-16128986-145698310-16130967-16128002-16128001-16131704-16129051-145698334-90111211-16128302-16128303-16128695-16131498-16128012-16128013-90111083-16129020-16130462-16130463-16130689-16131030-16131177-16131448-16131456-16131970-16129219-90111238-16129561-16131455-16130829-16129146-49176458-162135899-16130230-90111643-16130231-16129395-94541092-16130319-16130756-16131411-16128586-16129157-16129158-16129721-145698342-16128718-16129185-16130518-16129186-16128527-16128747-16128605-90111180-16129971-226524734-16130745-90111562-16128594-90111186-16129242-16130445-16131202-16128570-16128602-16129428-16130208-90111451-



16131133-16131203-16131318-16131318-90111617-16131529-90111079-16131903-16129119-162135900-16130272-16130512-16130594-16131284-16129121-90111234-16129863-16130153-16131348-16129927-90111193-16129076-16130208-226524734-226524753-90111404-145698270-16129616-16129778-145698252-16129759-16128705-16128706-16130844-16131942-49176071-16128979-16128980-16128981-90111253-16130835-16131023-90111557-49176329-16131117-16131153-16131377-16131591-16129122-16129255-16129303-90111268-16131024-16131152-16131545-16132186-90111307-49176127-90111462-16130503-16131927-16131467-16130734-16130990-16128310-16129755-16130213-16129861-16131747-49176442-16128375-16130428-16128547-16129852-16130429-16131653-90111383-16130026-16130492-16128796-16128795-226524756-16131910-16130739-16129675-16130742-16130743-16132120-16128311-16128447-16128448-16128481-16128966-16128967-16129101-16129661-16129852-16131155-16131224-16129065-49176400-49176077-16129458-90111646-16130175-16128008-16130176-16132026-90111603-16129699-16131846-16132117-16129203-16130724-16132049-16132048 CRS89 16130522-90111465-16129856-16129857-16130522-90111465-16130522-90111465 CRS90 16132062-90111741-16130245-16129698-90111273-16129004-16130893-16128642-16131656-16129771-16128357-16128990-16128373-16128414-16130348-16128091-226524746-16131979-90111694-16129116-16130163-16130651-16130545-16130388-16130389-16130724-16130245-16129406-16131568-90111747-16132208-90111380-16130008-90111438-16129830-226524762-16130195-90111165-16129563-49176423-16130720-49176422-90111486-16131780-16128543-145698229-94541112-16130888-90111524-16130807-16128415-16131129-16130102-16130499-16131926-16130843-90111741-16130091-16130092-16129084-90111683-16131905-90111097-145698316-90111257-16131912-90111211-16129051-308209621-16128820-90111097-16131519-90111628-90111458-90111631-16131535-16128166-16131640-90111680-16131792-16130217-16131148-90111680-90111114-90111267-16129443-296044035-16132021-16129406-49176391-16132150-90111609-16128105-16130067-16131852-16128117-49176446-90111088-16129891-90111360-16131787-16130230-16130231-16128874-16131920-16129197-16129914-90111581-16130075-16128550-16129982-90111678-16131868-16128068-90111419-16130266-16128607-90111348-16129819-16130075-16129216-16129217-16130143-16130846-16128426-16130929-16129026-16128568-16131803-16131804-16130652-16130094-16129768-16130251-16130579-16130213-16130271-16130137-90111681-16132060-16130452-16131921-16130012-16131731-16130825-16131321-16131513-16128055-16128055-16128055-16128982-145698339-16131856-16129701-16131912-16132108-16128362-16128361-16128506-90111416-16129254-16131659-90111645-16130984-16128373-90111176-16132113-16128937-16128179-16129253-16128097-16128096-16129658-16129659-16128506-16131334-16128039-16128101-162135896-16128765-16130444-145698312-90111424-16131545-16129482-16129616-145698270-16130124-16130125-16130137-16131703-16131704-16128506-16130720-90111379-16130007-90111185-16128873-94541090-16128366-16129170-16130271-90111564-16128461-16128460-16128315-16128316-16130579-16132113-16129375-145698298-16129331-16129172-16129173-49176087-49176088-49176089-49176368-16128970-16129252-16129735-16130149-90111428-90111189-16130198-16131954-145698255-16129373-16131799-16132087-16129655-16130540-16131098-16130524-16130699-16128681-16128596-145698329-16131065-16130937-90111530-16128681-16131823-16130745-16131129-49176448-16128567-16128568-16130075-90111081-16131063-16128191-16129680-16129681-16131920-145698226-16128721-145698262-90111291-16131678-16128722-16129419-16131677-16129493-16130493-90111159-16129633-16131324-16131950-90111544-16129565-145698268-16129255-16131927-16129252-90111289-162135903-16128829-16129488-16131542-16128794-16130545-16128681-90111168-16129598-49176129-16130442-16130494-16130496-16130498-16130520-16131541-16128828-16130141-16128084-90111683-16130217-16130289-16130684-226524742-16130196-16130141-16130892-16131058-90111633-16128671-16130135-16130137-90111493-16130727-16130868-16130961-16128427-16130960-16129774-226524755-90111189-16131328-16131665-16132080-16129999-16131271-16128519-16130638-16130651-90111158-16128628-145698293-16130384-16128610-16129999-16131941-16129525 CRS91 16131279-16131364-16131365-16129122-90111665-16131121-16131760-16129349-16129348-16128250-16132105-16131934-16131935-16128723-16132060-16130049-16130520-94541134-16132188-16128586-16130505-16130504-16128264-16130049-16129172-16129173-16130429-16130643-16130428-226524741-16128367-16129631-16131119-16128570-90111238-16129090-16132201-16129089-16130499-16130151-90111481-16130617-16129615-16129794-16129795-16130587-16131740-16128266-16130278-16131101-49176295-16131011-162135908-90111741-49176358-16130961-16130960-49176393-49176392-16129146-162135899-49176127-90111307-16128491-90111360-16130742-16128594-16130708-16130743-16131030-16131389-16128993-226524706-16131203-16131504-16131202-16131503-16129871-16129870-90111557-16129973-16131365-16131364-49176138-16129925-16129676-16129973-90111084-16128952-16128896-16130743-16130742-16129852-16128395-16131313-16131312-16129633-90111568-16130977-16129771-16128980-16131470-16127995-16128012-49175991-49176497-226524765-16128938-16127995-16130747-16128105-16131446-16131445-16132026-16132003-16130463-16130462-16131843-16131503-49176414-16129633-16128568-16132134-16128567-90111370-226524728-16128548-16128257-16129375-16129511-16130814-16131591-90111702-90111703-16132134-16129378-16130248-16129003-16129997-16129761-16128906-16129539-16129458-16128156-145698340-16131860-16131861-16128068-16131238-16131531-94541128-16129561-16129978-16131892-49176479-49176480-16131482-16131483-16128551-16128466-90111140-16129499-16130419-16130418-16129211-16129388-90111494-16129387-16129631-145698297-16130749-16129237-16128012-49175991-90111286-16131330-16131331-16128105-16128654-16128655-16128540-16129013-16131762-90111653-16128896-16128034-90111081-16128367-16128474-16130945-16128459-16128473-16130946-16129100-16128759-16128758-49176408-16131712-90111142-16130186-90111407-16130984-16129981-16129539-145698298-145698312-90111665-90111316-16129732-16129733-16129854-16130939-226524726-16128366-16129904-16129905-16129075-16128396-90111214-16130278-90111544-49176474-90111714-49176489-90111211-16129051-16130123-90111688-

90111440-16129140-16130867-16131881-145698341-90111384-145698260-16130988-16129433-16130987-16130175-16130176-16129927

CRS92 16129024-16130168-90111108-90111083-16129335-16129504-16128537-16129954-90111205-16129057-16131819-16131857-16128255-16131127-16128571-16128904-90111190-16130512-16129179-16129180-16130875-145698309-16128635-90111199-94541103-226524718-16129057-16129345-16128748-16128749-90111264-16129210-145698250-16129660-16129494-145698312-16129187-16130596-90111458-16128527-16129913-16129675-16129615-16132153-16131794-16128674-94541101-90111555-16128675-16128383-16128384-16131798-49176358-145698310-16132134-49176480-49176479-49176368-16131411-16129818-16131458-16129929-145698341-16131881-49176107-16129379-16129380-16128460-16128461-16131368-162135903-16131970-16131577-90111198-90111730-90111087-16128116-49176071-16128979-16130050-16129697-90111407-16130186-16128091-90111361-16130141-90111527-16131436-16131437-16128212-16128213-145698274-90111561-16131436-16131437-16129697-16131935-90111440-16131524-16131525-16131333-16128980-16128981-16130793-16128844-16129743-90111332-16130271-162135897-90111171-16128196-16128195-16130168-16128955-16128956-90111257-16130999-90111440-16130583-226524763-16129239-16129238-16129100-90111629-16131216-16131810-49176276-16130771-16128410-90111132-90111305-90111083-49176267-16128575-16131502-16131718-16130722-90111492-16131529-49176390-16128375-90111659-16131722-90111325-16129713-16131101-16131240-16130937-90111530-90111603-16129167-16129168-16128779-16129691-90111495-90111692-16131760-16129407-226524714-16129846-16130708-90111086-16128465-16131988-16130357-16131110-16128982-16131836-16131101-16131958-226524735-16130146-16131011-90111121-16128481-16129919-16129954-16130882-16132177-16131734-16131735-16128650-49176459-90111663-16129390-90111407-16128895-16130186-16131217-16128701-90111431-16128962-16128961-16130671-16130672-16130226-145698231-16128528-16128669-90111497-16128008-49176137-145698318-16132127-90111122-90111440-16129121-16128252-345452715-16128154-16128501-16128502-901111378-16131529-90111380-16130008-49176448-16131843-90111144-16130641-90111155-145698312-16131294-16129395-94541092-16128605-94541112-16129054-145698252-16130153-16131384-145698339-16131856-145698224-90111561-16129933-16128944-16131463-16128537-16128676-16131464-16131325-16132082-16132083-16128703-16129158-16129157-226524732-16132135-16130755-16130757-16128571-16129884-16129885-16130278-16130620-16130491-16128490-16130939-16131455-16131456-16132063-308209623-90111123-16129295-94541101-16128675-16131366-16131367-16130187-16131217-16131808-16130183-145698288-16131153-16130520-16128026-16129646-16129714-16129715-90111677-16132082-16132083-90111250-90111355-16128915-16128914-16130371-90111262-16128554-16128555-16129631-16130771-49176276-16129633-16128535-145698297-16131028-16129338-16129375-16130320-16130321-145698309-16131596-16129743-16131752-90111332-49176443-16130049-16130747-16130583-90111440-16131736-16130270-16128642-16131295-16131408-16131296-16131407-16129952-162135904-16128279-16128892-16128950-16129245-16129715-16129714-16129101-16129102-16130368-16130591-16129017-16129018-90111497-90111295-16128568-16128567-16129919-16128671-16128437-49176025-16130345-16130344-16128567-90111154-16128602-90111184-16130543-16129076-94541124-16129003-16130768-16130103-90111643-16129615-16129737-16129884-16129885-16131591-16129078-16129079-16128109-16129185-16130798-16131752-90111131-16131653-49176443-16130534-16130533-16128950-90111603-16128920-49176177-16130225-16128239-16129428-16131011-162135908-16129482-90111591-16129861-90111171-162135897-901111209-16129029-16131833-90111674-16128364-90111125-49176018-90111305-16128937-16130219-16131598-16128988-49176329-16131117-16128650-16129072-16131279-16131848-16131847-16129614-16130163-16128778-90111631-16131535-16128528-16130687-16128165-16128425-16129851-16129622-16128311-16130445-90111451-16131709-16131242-16131243-16129559-16129363-16129937-16130763-16129100-16131879-16130939-16129721-16128367-16131119-345452725-16130297-16130296-16130147-90111182-90111320-16128845-90111575-16130225-16128241-16128239-16128519-16128417-16128906-162135916-90111705-16130918-145698291-16129804-226524753-16130583-16130912-145698248-16131216-16131736-16129182-16130755-16129494-16130546-16130844-90111250-16128763-16130740-16131852-90111614-16131779-90111114-16130606-16130671-16130672-16129101-16129101-16129102-16129102-16130147-90111468-49176414-16131488-16131757-145698233-16129511-16128737-16130153-16131846-49176407-16128555-16128554-16129575-16130807-16130049-145698279-16128343-16128604-16130924-16130923-16132197-16132198-308209621-90111389-16129660-226524751-16131506-16131542-162135906-16128920-16128635-16128694-16131593-16130207-16130184-16131506-16130828-49176193-49176293-16130100-90111381-226524729-226524730-16129988-16131314-16128425-16128165-16128654-90111256-16128655-90111255-16131839-16131838-16128478-16130603-16128989-16128572-16131221-345452721-16132060-16130049-16131839-16131838-16130316-16128025-16128266-90111081-90111266-16128034-16130630-16132158-90111114-94541127-16131473-16131830-16128034-90111081-16130744-90111237-16129213-16128583-16130608-16128582-49176260-90111242-16129422-94541110-90111278-16129076-90111147-16129899-90111359-16130492-16129101-16130013-16129102-16130543-16128904-90111190-16131524-16131525-145698292-16130163-90111421-16131119-90111690-90111691-16128779-90111705-162135916-90111291-16129493-16129036-16129801-145698341-16129035-16129802-16130962-16131200-16131881

CRS93 16128547-16129455-16130300-16130350-16130430-226524711-16129700-90111384-16128585-16130172-16130667-16130745-16131104-16131316-16131653-16130010-16130011-16132177-16130430-16130751-145698341-49176329-90111743-16131117-16131849-16130824-16129100-162135894-16130049-16131840-90111685-16131916-145698325-49176370-90111280-90111389-162135896-16128765-16129093-16129185-16129186-16129338-16131958-16132188-94541134-16128605-16129185-16128366-16128367-16132183-16128366-16128367-16128676-16131779-16128723-162135894-16130049-16131840-90111685-16131916-90111079-16129100-162135899-16129146-16130755-16131954-16128590-16128591-90111186-16129619-16129975-16131247-16131318-16129202-16129003-145698258-90111274-

90111123-16129004-16130885-16130886-145698309-16128053-16129165-90111288-16130168-16129485-226524719-90111685-16131916

CRS94 221800782-16130082-16131859-16129252-90111163-49176045-16131757-16130143-16130914-16129310-16129569-16128703-90111176-16131477-16129197-16128414-16131230-16131231-16130070-16130071-16132150-16131479-16128568-16128459-16131461-90111417-16130143-90111637-145698339-16131856-16130495-226524743-16129245-16128244-16130444-90111105-16132148-16128900-16129231-16129087-90111605-90111606-16130242-16128795-16128796-90111522-16130867-16128711-16130088-90111403-16128225-16130619-90111611-16130630-16130496-16128095-16132108-16128965-16130013-16130650-16129642-16131498-16129988-16130132-226524735-16131508-16131063-16128478-16128022-16128032-16128209-16128214-16128308-16128308-90111117-345452717-94541100-16128650-16128665-16128701-90111173-16128828-16128984-16129013-16129041-16129695-49176170-16129985-16129985-16129999-16130069-16130082-16130170-90111452-16130719-16130825-16130859-90111523-16130965-16130966-16130978-16131134-16131134-49176343-16131323-16131325-16131415-16131471-90111642-16131593-16131595-16131742-16131742-16131742-16131755-16131775-16131842-16131842-16131859-16131863-16131880-16131894-16131922-16131933-16131933-16132002-49176475-16132059-16132081-16132145-16132126-16131227-90111176-16130838-16131782-16130831-16131934-94541118-90111399-90111247-16128340-90111458-16128270-16130347-16129047-90111210-16130519-226524764-16132172-16131851-16131850-16129919-90111468-16131471-145698267-16129230-16130577-16131912-90111181-16128308-16128308-16128308-90111117-345452717-16128701-16128828-16130170-16130170-16130170-90111452-16130719-16130966-16130978-90111537-49176343-16131742-16131742-16131880-16131894-16131922-16132002-16132059-16128022-94541100-16128650-16128665-16128754-145698236-16129041-49176170-16129999-16130069-16130825-90111523-16130965-16131415-16131471-90111642-16131755-16131775-16131782-16131842-16131863-16131863-16131933-16131970-49176475-16132145-16132199-16132199-16129249-16131593-16130619-16129700-16130488-90111106-162135895-345452715-16130804-16128252-16128575-16130687-49176437-16128979-49176071-16130703-90111382-16130735-296044035-16132021-16128754-16132080-16129184-90111519-16128763-16130653-16128902-16131519-90111628-90111261-16131323-90111693-16132110-90111368-90111168-49176302-16130311-16128540-16131416-16128385-49176390-90111094-16131412-16130213-16130257-90111108-16130012-16129113-90111554-16131072-16131111-16129626-90111716-16129633-16130868-49176459-16130132-16130670-90111573-49176308-16131906-94541100-16130825-16130082-16131806-16128156

CRS95 145698269-90111312-16128723-90111735-145698229-16128543-16130428-16130429-16129640-16128809-16128810-90111612-16131420-16128904-90111190-16128573-16130129-16128574-16130130-16130745-94541112-16130130-16128576-16128203-16129975-16129324-16129335-16129504-16131776-16131777-16130340-16130266-90111419-16129168-16129167-16128192-16128193-16130667-16131294-16129101-90111277-16129413-16130400-226524724-16129204-49176329-16131117-16130703-16130967-145698310-90111378-16132214-16132213-16129558-16129559-16131202-16131503-16131203-16131504-16128723-16128096-16128097

CRS96 16130064-16130065-16132134-16128586-16129630-16130248-16130278-16131101-16132134-49176497-226524765-16130663-90111237-16129213-16129455-16130956-16130957-16130720-16129103-16131202-16131203-16128528-16130735-16128026-16128452-16130093-16128451-16130301-16128896-16130751-16130757-90111173-16131840-49176489-16129630-16131314-16131342-16131343-16131659-226524741-16130643-16131947-49176422-49176423-16128567-16128568-16129003-16130049-16130520-16128655-145698336-16128012-49175991-16128654-90111552-16128462-16128264-16129852-16132200-16128034-16130186-16130887-90111081-90111186-16129123-90111407-90111609-16132026-145698279-16129855-49176127-90111307-16129666-16129848-16132089-16132090-16128537-16129675-16129308-16132040-90111353-16130591-226524748-16128614-49176480-49176479-16128659-157783150-16129013-16129700-16130894-16131768-16128706-16128705-145698291-16130707-16130720-16129452-16130150-49176425-16131680-16132002-162135908-16130649-16131011-16128110-16128111-16128968-49176418-16128605-16128488-16128489-90111294-16130230-16130231-16131440-16128986-90111495-90111326-16129203-16130231-16128445-16130230-16130430-90111255-90111256-16130010-16130011-16131407-16131408-16129310-90111642

CRS97 16131680-49176425-90111261-16131323-16128711-16128763-90111153-16130577-90111637-16128900-16129620-49176133-16128946-16132040-16131593-49176417-16131666-16129010-16130504-16130505-145698321-16130624-16129778-16130103-16131137-345452716-16128192-16128193-16130067-16129751-16130545-90111558-16128308-16128308-16128308-90111117-345452717-16128701-16128828-16130170-16130170-16130170-90111452-16130719-16130966-16130978-49176343-16131742-16131742-16131880-16131894-16131922-16132002-16132059-16128022-94541100-16128650-16128665-16128754-145698236-16129041-49176170-16129999-16130069-16130825-90111523-16130965-16131415-16131471-90111642-16131755-16131775-16131782-16131842-16131863-16131863-16131933-16131933-16131970-49176475-16132145-16132199-16131815-16129482-49176282-16130630-16131508-90111741-16129247-16130289-90111573-16130577-16131549-226524758

CRS98 16131197-16130868-16128188-16129045-16131656-16128061-16132197-16132198-90111508-16131919-16130732-145698258-90111274-16131601-16131578-16129116-16128989-49176390-16131799-90111509-90111510-16128811-162135905-16131919-16128938-16129249-16128095-16130846-90111339-16129781-90111582-90111493-90111672-16128596-16128191-16130131-16131568-49176390-16131411-49176368-16128668-16130270-16131941-16129057-16128794-16128550-16128663-16128662-16128674-16131079-16129265-90111246-90111177-90111430-49176448-16128761-16130732-16131978-90111354-16129237-16130219-16132144-16128513-16130626-16130195-16131229-90111332-16129743-16130897-226524732-90111428-16129702-145698310-49176448-16132196-16130672-16130671-16131893-16130012-16129261-16130899-90111168-145698310-16129254-16130253-90111082-16132150-16129830-90111558-90111493-90111488-16129632-16131842-16131947-16131947-90111361-90111520-16131926-16130625-16129914-16128439-16128440-16129700-

16129363-16129937-16130763-16131548-16131924-16131530-16129499-16128095-16131321-16131263-16132144-90111361-16131508-90111428-90111429-49176475-16130892-16129700-16129721-90111520-16129141-308209620-16131961-90111430  
CRS99 16129151-90111354-16129152-16130104-90111550-226524750-16128765-16130183-162135896-16131744-16131263-16131745  
CRS100 16129759-16131436-16131437-16131934-16131935-90111106-16130771-16132188-94541134-16131768-16129058-16130251-90111718-16130169-16131436-16131437-345452719-16130738-16130780-16131836-16131436-16131437-90111454-16130439-16130738-16129862-90111631-16131535-90111282-145698288-16130755-16129441-16130187  
GFR1 16130424-16128507-16129193-16130433-16130401-16129242  
GFR2 16130499-16128102-16129694-16128898-162135898  
GFR3 16130403-16128025-16130742-16131307-16131845-16130807-16131796  
GFR4 90111645-16131604-16131639-16132000-16130443-16129581  
GFR5 16131596-16131593-16128384-16131365-16131846-16130887-16131341-16128001  
GFR6 16131063-16132076-16131238-16131127-16131795-16128026-16130858-16129715-16129152  
GFR7 16131483-16131757-16129733-16130828-16131754-16129632-16131851-16129970-16130815-16132212-16128723-16128109-16128107-16130826-16130320-16129807-16128493  
GFR8 16129620-16129238-16130937-16128398-90111575-16130151-16128743-16128742  
GFR9 49176207-16130212-145698291-16130388  
GFR10 16132002-16128510-16131955-16130330-16128187-16129828-16130052-16129819-16130604-16129595-16131431  
GFR11 16131597-16131598-90111555-16128366-16129155-16128807-49176077-16128142-16131072-16128089  
GFR12 16128421-16128422-16128424-16128425-16128426  
GFR13 16131057-226524751-16131059-16128162-16128167-16128163-16128165-16131121  
GFR14 16128371-16128228-16128980-16128897-16131103-16128258-16130722  
GFR15 16128127-16128124-16128138-16128410-16128096-16129766  
GFR16 16131813-16131815-16131816-16129675-16129670-16131076-16130539-16130494-16131200-16130530-16131189-16129167-16129672-16128017  
GFR17 16130640-16130607-16131869-16129235-16131665-16128092  
GFR18 16131884-16128747-16131704-16131506-16131885-90111516-16130862-16131047-16130505-16129814-16129703-16130337-16129077-16128682  
GFR19 16130963-16130961-16130962-16131177  
GFR20 16131632-16128068-90111084-16130814-16128656-16129960  
GFR21 16130659-16130671-16130340-16131678-16131777-16131779-16131839  
GFR22 16131570-16130166-16131773-16129718-16130930-16130915-16130817-16130587-16129227-16130266-16128383-16128202  
GFR23 16131765-16131300-16130518-16131299  
GFR24 90111581-226524719-16128874-49176336-16128373-16128576-16131880-16130522-16130744-16129660-16128722  
GFR25 16131830-16128888-16128848-16130735-16129301-16132183-16128451-90111205-16129568-16129795-16130169  
GFR26 16131755-16130350-16132064-16131891-16131894-16128981-94541101-16131230-16129211-16130227-16128738-16128462-16128449  
GFR27 16128851-16128458-16131817  
GFR28 16130838-16128114-145698307  
GFR29 16128703-16128701-16131436-16131916-16130389-16128002-16131384-16131028-16131019-16131280-16129768-16129569-16129658  
GFR30 16131768-16130199-16131698-16131808-16131319-16128795-49176426-90111515-16130184-16130167-16128749-16128611-16128645-16128003  
GFR31 16128575-16128568-16131666-16128720-16128573-16129855-16130324-16130936-16131284-16129303  
GFR32 16128161-16128164-16128018-16128042-145698236  
GFR33 16129871-16129870-16129811  
GFR34 16131068-16131069-90111553-16132189  
GFR35 16128871-16128869-16129805-16129197-226524704-16131435-16129982-16132197  
GFR36 16129204-16129205-16129213-16128148-16131903-16129683  
GFR37 16131215-16128780-16129852-16129794  
GFR38 16132060-16132059-16132041  
GFR39 16128057-16128055-16128058-16130707-16130703  
GFR40 16129230-16129776-16131848-16129049  
GFR41 16130533-16128008-16130852-16131145  
GFR42 16128778-16128779-16131524-16131753-16128731-49176401  
GFR43 16131574-16131571-16131609  
GFR44 16130730-16130725-16131420-16130096-16130008-16130605-16129818-16128439  
GFR45 16128715-16128711-90111166-16128718  
GFR46 90111212-16129058-16129057-16131143  
GFR47 16131513-90111624-16131836-16132067

GFR48 16130434-16128407-16128513-157783150  
GFR49 16131860-16131859-16131932-16131330  
GFR50 16128879-16128877-16130732-16132193-16130123  
GFR51 16132055-90111557-16128615-16130445-16128074-90111157  
GFR52 16129035-145698279-16129034  
GFR53 16131117-16131949-16129667-16130093-16128143-16132114-16132112-16131804-16130959-16130984-16131935-  
16131549-16131400-16131963-16129324-16128595-16128040  
GFR54 16131416-16131415-16131582-16131170  
GFR55 16129017-16128208-16131039-16129995-16129808-16129985  
GFR56 16131995-16131994-16131989-16131999  
GFR57 16129172-16129170-16129173  
GFR58 16130248-16130251-16130255-16130311  
GFR59 16129065-16128567-16128773-16128570-16129149-16128152-16128556  
GFR60 16128857-16128855-16128915  
GFR61 16132082-16132081-16128147  
GFR62 16131306-49176351-16131126-16131236  
GFR63 16131115-90111559-16131172  
GFR64 16131776-16131677-16131850-16128650-16131612-16130906-16127995-90111288-16128895  
GFR65 16131337-16131504-16131520  
GFR66 16128637-16128638-16128192-90111355-49176333-16129752-16128386  
GFR67 16131905-16131735-16131895-16131620  
GFR68 16129553-16129554-16129561  
GFR69 49176450-16128459-16129934  
GFR70 16130339-16129236-16130347-16129341-16129721-16131389  
GFR71 16130577-16130591-16130824-16132030-16130094-16131941-16129451-16130503  
GFR72 16131763-16130175-162135900  
GFR73 16130953-16129488-90111182-16129249-16130597-16128463-16130599-16130121-16129388-16129842  
GFR74 16131824-16128408-16130042-16131288-16129596-16128194  
GFR75 90111384-16130029-16130225  
GFR76 16131631-16131627-16129702-16131957-16128179  
GFR77 16131228-16131226-16131242-16131275-16130498  
GFR78 16129099-16128318-16129237-16131794-16130147-16128696  
GFR79 16131878-16132023  
GFR80 16131742-16131744-16131745-49176045-49176446  
GFR81 49176156-16129783-16129720-16129762  
GFR82 16129885-16129891-16130477-16129016-16131373-16132176-90111289-16129838  
GFR83 16129210-16128758-16129619-16131868-16130914-16131985  
GFR84 16130156-16130007-16130130-16128554  
GFR85 16128899-16128912-16129969  
GFR86 16132142-16132117-16131928-16129179-16131474  
GFR87 16129284-16129196-16130693-16130153-16131539-90111362-16130301-16128519  
GFR88 16129691-16129692-16129771-16130341  
GFR89 16131967-16130960-16131806  
GFR90 16131988-16131477-16132204  
GFR91 16131241-16129226  
GFR92 16128828-16128832-16129857-16128313-16130244-16131966-16131053-16130245-16128105  
GFR93 16130843-16130861-16130796-90111661  
GFR94 16129759-16129758-145698269  
GFR95 16131710-16131709-16131371  
GFR96 16131391-16130945-16130095  
GFR97 16131336-16130531-90111653  
GFR98 16128448-16128447-16128465  
GFR99 16129499-16129498-16130596-16129295  
GFR100 16129036-16129041-16129072  
PCS1 145698223-145698261-16128430-16130643  
PCS2 94541124-145698310-90111382-16129090  
PCS3 145698224-145698245-16129498-90111381  
PCS4 145698230-145698236-16131520-16129612-16128857-16130862  
PCS5 145698233-145698255-16131671-16128765  
PCS6 145698239-145698262-16128602-16129246  
PCS7 145698247-16128068-16128607-16129954  
PCS8 145698254-145698331-16128117-16128785

PCS9 145698256-145698300-90111460-16129380  
PCS10 145698260-16128054-16128676-90111611  
PCS11 145698268-145698292-162135918  
PCS12 145698269-16128123-16130542-90111716  
PCS13 145698279-145698288-16130540-16131341  
PCS14 145698281-145698308-16129249-90111451-16129143  
PCS15 145698285-145698338-16130121-16130799  
PCS16 145698291-145698295-16130212-16129613-162135905  
PCS17 145698301-145698303-49176235  
PCS18 145698314-16128073-16132213-16131582  
PCS19 145698322-16128017-16132076-16131871  
PCS20 145698327-16128003-90111675-226524763  
PCS21 145698334-16128001-16131836-16131916-16131593-90111325  
PCS22 145698340-16128107-16129811-16128171  
PCS23 157783149-16128000-16128899-16129036  
PCS24 157783152-16128202-16131967-16131506  
PCS25 16128002-16128026-16130684-16128528  
PCS26 16128004-16128013-49176011-16131932  
PCS27 16128022-16128032-16128105-16131319  
PCS28 16128025-16128074-16128656-16131792  
PCS29 16128034-16128148-16130779-16131047  
PCS30 16128040-16128124-16129186  
PCS31 16128042-16128049-16128912-16130130  
PCS32 16128048-16128089-16130169-16130170  
PCS33 16128053-16128057-16129644-90111688  
PCS34 16128058-16128063-16129300-16128464-16128461  
PCS35 16128059-16128120-16131971-16129072  
PCS36 16128092-16128110-16131913-90111225  
PCS37 16128096-16128102-16131806  
PCS38 16128097-16128111-16128142-90111272-16128384  
PCS39 16128101-16128205-16130145-16128316  
PCS40 16128103-16128109-16131815-90111088  
PCS41 16128106-16128119-16132002-16128779  
PCS42 16128114-16128153-16128879-16130879  
PCS43 16128116-16128152-90111523  
PCS44 16128127-16128201-16130492-16129167-16128611  
PCS45 16128133-16128213-16128428-16129744-16128465  
PCS46 16128138-16128192-16130457-16128332  
PCS47 16128143-16128271-16131722  
PCS48 16128147-16128149-90111084-16130394  
PCS49 16128154-16128165-16128715-16131833  
PCS50 16128160-16128183-16128758-90111320-16131437  
PCS51 16128163-16128244-16131420-16131710  
PCS52 16128193-16128210-16128395-49176361  
PCS53 16128194-16128321-16132090-90111230  
PCS54 16128195-16128196-16132000-16128501-16131861  
PCS55 16128208-16128209-16129182-16129235  
PCS56 16128212-16128217-16128439-16129650  
PCS57 16128214-16128290-90111539-16129818  
PCS58 16128223-16128224-16128313-16131985  
PCS59 16128228-16128324-16129876-16131754  
PCS60 16128239-16128257-16131141-16132145  
PCS61 16128241-16128318-16132112-16129214  
PCS62 16128252-16128303-16128389-16129504  
PCS63 16128266-16128383-16129126-49176267  
PCS64 16128273-16128435-90111273-16131094  
PCS65 16128281-16128452-16129616  
PCS66 16128291-16128315-16131296-90111234  
PCS67 16128299-16128370-16128731  
PCS68 16128300-16128447-16129494-90111253  
PCS69 16128310-16128443-16130095  
PCS70 16128348-16128459-16132041-49176475

PCS71 16128361-16128366-16129776-90111167-16129398  
 PCS72 16128371-16128424-16131059-16131148  
 PCS73 16128378-16128390-16128408-16131838  
 PCS74 16128398-16128402-16128567-16131069  
 PCS75 16128407-16128471-16130701-16129999-16130175  
 PCS76 16128410-16128448-16130671  
 PCS77 16128417-16128588-16131609-16130515-16128851-16130330-16131166  
 PCS78 16128421-16128422-16128425-16128591-49176171  
 PCS79 16128426-16128457-16128478-16131880  
 PCS80 16128427-16128575-16128576-345452717  
 PCS81 16128437-16128462-90111336-16129150-16130125  
 PCS82 16128440-16128453-90111706-16130641  
 PCS83 16128449-16128549-16131388-16129652-16130044  
 PCS84 16128460-16128526-16128225-16129851  
 PCS85 16128463-16128637-49176479-16129752  
 PCS86 16128468-16128509-16128720-16131885  
 PCS87 16128473-16128513-16131337-16130456  
 PCS88 16128474-16128722-90111183-16128874  
 PCS89 16128481-16128586-16129065-226524754  
 PCS90 16128488-16128489-49176329-16129485  
 PCS91 16128491-16128493-16129632  
 PCS92 16128507-16128554-67005950-16131231  
 PCS93 16128519-16128615-90111173-16130852  
 PCS94 16128520-16128556-90111412-90111174  
 PCS95 16128547-16128568-90111548-16131772  
 PCS96 16128552-16128593-162135894-90111547-16130743  
 PCS97 16128555-16128561-16128815  
 PCS98 16128560-16128594-49176045-16128813  
 PCS99 16128564-16128574-16131330-16130736  
 PCS100 16128573-16128749-16129838

**Table S4.** The EASE scores of predicted regulon clusters based on CRS, GFR and PCS.

| EASE | CRS      | CRS-c       | GFR         | PCS         |
|------|----------|-------------|-------------|-------------|
| 1    | 4.72E-14 | 1.11E-12    | 2.02E-08    | 0.0202565   |
| 2    | 1.09E-13 | 9.24E-07    | 9.23E-06    | 0.00626589  |
| 3    | 1.22E-13 | 0.00235294  | 0.00548588  | 0.066413    |
| 4    | 2.74E-12 | 0.000739571 | 5.72E-06    | 0.00782775  |
| 5    | 1.81E-11 | 0.000167079 | 6.61E-13    | 0.102572    |
| 6    | 9.96E-11 | 0.00619299  | 5.52E-10    | 0.0909337   |
| 7    | 1.86E-10 | 4.87E-06    | 8.62E-06    | 0.0447632   |
| 8    | 1.89E-10 | 1.85E-06    | 0.0447632   | 0.000372416 |
| 9    | 8.47E-10 | 4.33E-07    | 0.122333    | 0.00938777  |
| 10   | 1.45E-09 | 2.77E-05    | 0.00783236  | 0.00313664  |
| 11   | 2.10E-09 | 1.85E-06    | 0.0575217   | 0.0612602   |
| 12   | 2.17E-09 | 2.80E-08    | 0.0139282   | 0.032568    |
| 13   | 5.35E-09 | 4.33E-07    | 0.000579284 | 0.0218018   |
| 14   | 5.98E-08 | 3.14E-06    | 0.0218018   | 0.00313664  |
| 15   | 6.37E-08 | 0.00178822  | 0.00182292  | 0.00470311  |
| 16   | 7.24E-08 | 0.000121573 | 1.25E-05    | 0.00626589  |
| 17   | 9.56E-08 | 0.0025341   | 0.0447632   | 0.00313664  |

|    |             |             |             |             |
|----|-------------|-------------|-------------|-------------|
| 18 | 1.30E-07    | 0.00548588  | 0.00195108  | 0.00313664  |
| 19 | 1.48E-07    | 0.00704774  | 4.16E-09    | 0.00313664  |
| 20 | 1.63E-07    | 0.00392003  | 0.00939513  | 0.0125023   |
| 21 | 3.48E-07    | 5.15E-06    | 1.11E-05    | 0.00626589  |
| 22 | 4.82E-07    | 0.00470311  | 1.30E-08    | 0.00313664  |
| 23 | 1.85E-06    | 5.15E-06    | 0.0086139   | 0.0337573   |
| 24 | 2.36E-06    | 0.00157466  | 0.0101761   | 0.0125023   |
| 25 | 3.24E-06    | 1.04E-05    | 0.0101761   | 0.00470219  |
| 26 | 4.62E-06    | 0.0029469   | 0.0163931   | 0.00938777  |
| 27 | 6.39E-06    | 0.00313664  | 4.28E-09    | 0.00587543  |
| 28 | 1.54E-05    | 4.15E-05    | 0.0156064   | 0.0125023   |
| 29 | 1.55E-05    | 1.63E-07    | 0.00470219  | 0.025261    |
| 30 | 1.66E-05    | 9.92E-05    | 0.0431615   | 0.00313664  |
| 31 | 1.69E-05    | 7.18E-05    | 0.00437077  | 0.102572    |
| 32 | 2.23E-05    | 0.000426485 | 0.0264268   | 0.0125023   |
| 33 | 2.31E-05    | 1.33E-06    | 0.00352803  | 0.00313664  |
| 34 | 2.88E-05    | 1.81E-06    | 4.60E-05    | 0.00352803  |
| 35 | 3.70E-05    | 0.000110249 | 0.257835    | 0.0156064   |
| 36 | 5.16E-05    | 0.00470311  | 0.018702    | 0.12655     |
| 37 | 5.85E-05    | 9.23E-06    | 0.00938961  | 0.0156095   |
| 38 | 6.08E-05    | 0.00313664  | 0.00470219  | 0.0520525   |
| 39 | 6.08E-05    | 7.18E-05    | 0.0264268   | 0.010946    |
| 40 | 6.91E-05    | 0.00977701  | 0.257835    | 0.00313664  |
| 41 | 9.24E-05    | 0.00392003  | 0.00782775  | 0.00392003  |
| 42 | 9.51E-05    | 0.00470311  | 0.0752779   | 0.0202565   |
| 43 | 9.92E-05    | 0.000304857 | 0.00235294  | 0.00313664  |
| 44 | 0.000111162 | 0.0125023   | 0.000125145 | 0.00977701  |
| 45 | 0.0001164   | 0.0013103   | 0.102572    | 0.0909337   |
| 46 | 0.000126003 | 0.00470311  | 0.0171603   | 0.000739571 |
| 47 | 0.000151061 | 0.00313664  | 0.0667462   | 0.00782775  |
| 48 | 0.00026388  | 5.15E-06    | 0.00470219  | 0.00313664  |
| 49 | 0.000265133 | 9.92E-05    | 0.000171393 | 0.00626589  |
| 50 | 0.000287032 | 0.00392003  | 0.0337573   | 0.0125023   |
| 51 | 0.000318714 | 0.00313664  | 0.00235294  | 0.0187093   |
| 52 | 0.000339261 | 0.000904277 | 0.00782775  | 0.00470219  |
| 53 | 0.000373133 | 0.00548588  | 0.00352803  | 0.00313664  |
| 54 | 0.00038315  | 0.00326861  | 0.00049159  | 0.00235294  |
| 55 | 0.000414649 | 5.02E-05    | 0.0271723   | 0.00313664  |
| 56 | 0.000449229 | 0.00352803  | 0.00782775  | 0.0264268   |
| 57 | 0.000474222 | 0.00626589  | 0.0198825   | 0.0909337   |
| 58 | 0.000563523 | 0.00271154  | 0.00938777  | 0.0909337   |



|    |             |             |            |            |
|----|-------------|-------------|------------|------------|
| 59 | 0.000640507 | 0.000904277 | 0.0125023  | 0.0688073  |
| 60 | 0.000663805 | 0.00470219  | 0.00235294 | 0.00782775 |
| 61 | 0.000739571 | 0.00587543  | 0.00568411 | 0.00235294 |
| 62 | 0.000765221 | 0.00977701  | 0.0730683  | 0.021789   |
| 63 | 0.000765221 | 0.000739571 | 0.0667462  | 0.112365   |
| 64 | 0.000766307 | 0.000313137 | 0.00392003 | 0.00626589 |
| 65 | 0.00077915  | 6.86E-08    | 0.0013103  | 0.00178822 |
| 66 | 0.000791962 | 0.00392003  | 3.85E-05   | 0.00392003 |
| 67 | 0.000948039 | 0.00156893  | 9.23E-06   | 0.00938777 |
| 68 | 0.00104791  | 0.00235294  | 0.0014355  | 0.00470219 |
| 69 | 0.00111964  | 0.00392003  | 0.0686359  | 0.010946   |
| 70 | 0.00112551  | 0.00235294  | 0.00313664 | 0.0125023  |
| 71 | 0.00112551  | 0.00392003  | 0.0198825  | 0.0688073  |
| 72 | 0.00130124  | 0.00313664  | 0.00782775 | 5.54E-06   |
| 73 | 0.00130344  | 0.00313664  | 0.0143776  | 0.00352803 |
| 74 | 0.00138033  | 0.0447632   | 5.26E-07   | 0.00313664 |
| 75 | 0.00149821  | 0.00027759  | 0.00392003 | 0.0032776  |
| 76 | 0.00155399  | 0.0140623   | 1.69E-06   | 0.00392003 |
| 77 | 0.00164528  | 0.00313664  | 0.0156095  | 0.00235294 |
| 78 | 0.0024872   | 0.00470311  | 0.00704774 | 0.00626589 |
| 79 | 0.003679    | 9.23E-06    | 0.0152282  | 0.0462794  |
| 80 | 0.00370819  | 0.000904277 | 0.200359   | 0.00352803 |
| 81 | 0.00461326  | 0.00977701  | 9.24E-07   | 0.00178822 |
| 82 | 0.00487906  | 0.00587543  | 0.00313664 | 0.00392003 |
| 83 | 0.00512806  | 0.00626589  | 0.00938961 | 0.00938777 |

**Table S5.** Regulon coverage score analysis of top 100 clusters for CRS, GFR and PCS.

| regulon     | reg_size | score | top_n | top_size | overlap | RCS      | overlap_coe |
|-------------|----------|-------|-------|----------|---------|----------|-------------|
| <b>Fis</b>  | 60       | CRS   | 5     | 91       | 8       | 0.133333 | 0.133333    |
| <b>FNR</b>  | 95       | CRS   | 5     | 91       | 14      | 0.147368 | 0.153846    |
| <b>H-NS</b> | 61       | CRS   | 5     | 91       | 3       | 0.04918  | 0.04918     |
| <b>FruR</b> | 33       | CRS   | 5     | 91       | 6       | 0.181818 | 0.181818    |
| <b>Lrp</b>  | 30       | CRS   | 5     | 91       | 1       | 0.033333 | 0.033333    |
| <b>LexA</b> | 29       | CRS   | 5     | 91       | 11      | 0.37931  | 0.37931     |
| <b>IHF</b>  | 68       | CRS   | 5     | 91       | 4       | 0.058824 | 0.058824    |
| <b>NsrR</b> | 32       | CRS   | 5     | 91       | 4       | 0.125    | 0.125       |
| <b>CRP</b>  | 183      | CRS   | 5     | 91       | 19      | 0.103825 | 0.208791    |
| <b>MarA</b> | 21       | CRS   | 5     | 91       | 0       | 0        | 0           |
| <b>PhoP</b> | 29       | CRS   | 5     | 91       | 1       | 0.034483 | 0.034483    |
| <b>ArcA</b> | 58       | CRS   | 5     | 91       | 4       | 0.068966 | 0.068966    |
| <b>NarL</b> | 29       | CRS   | 5     | 91       | 4       | 0.137931 | 0.137931    |
| <b>Fur</b>  | 45       | CRS   | 5     | 91       | 1       | 0.022222 | 0.022222    |

|             |     |     |    |     |    |          |          |
|-------------|-----|-----|----|-----|----|----------|----------|
| <b>CpxR</b> | 30  | CRS | 5  | 91  | 2  | 0.066667 | 0.066667 |
| <b>SoxS</b> | 21  | CRS | 5  | 91  | 0  | 0        | 0        |
| <b>Fis</b>  | 60  | CRS | 10 | 180 | 11 | 0.183333 | 0.183333 |
| <b>FNR</b>  | 95  | CRS | 10 | 180 | 19 | 0.2      | 0.2      |
| <b>H-NS</b> | 61  | CRS | 10 | 180 | 3  | 0.04918  | 0.04918  |
| <b>FruR</b> | 33  | CRS | 10 | 180 | 8  | 0.242424 | 0.242424 |
| <b>Lrp</b>  | 30  | CRS | 10 | 180 | 1  | 0.033333 | 0.033333 |
| <b>LexA</b> | 29  | CRS | 10 | 180 | 12 | 0.413793 | 0.413793 |
| <b>IHF</b>  | 68  | CRS | 10 | 180 | 9  | 0.132353 | 0.132353 |
| <b>NsrR</b> | 32  | CRS | 10 | 180 | 6  | 0.1875   | 0.1875   |
| <b>CRP</b>  | 183 | CRS | 10 | 180 | 23 | 0.125683 | 0.127778 |
| <b>MarA</b> | 21  | CRS | 10 | 180 | 0  | 0        | 0        |
| <b>PhoP</b> | 29  | CRS | 10 | 180 | 2  | 0.068966 | 0.068966 |
| <b>ArcA</b> | 58  | CRS | 10 | 180 | 8  | 0.137931 | 0.137931 |
| <b>NarL</b> | 29  | CRS | 10 | 180 | 6  | 0.206897 | 0.206897 |
| <b>Fur</b>  | 45  | CRS | 10 | 180 | 2  | 0.044444 | 0.044444 |
| <b>CpxR</b> | 30  | CRS | 10 | 180 | 2  | 0.066667 | 0.066667 |
| <b>SoxS</b> | 21  | CRS | 10 | 180 | 0  | 0        | 0        |
| <b>Fis</b>  | 60  | CRS | 15 | 366 | 16 | 0.266667 | 0.266667 |
| <b>FNR</b>  | 95  | CRS | 15 | 366 | 29 | 0.305263 | 0.305263 |
| <b>H-NS</b> | 61  | CRS | 15 | 366 | 13 | 0.213115 | 0.213115 |
| <b>FruR</b> | 33  | CRS | 15 | 366 | 11 | 0.333333 | 0.333333 |
| <b>Lrp</b>  | 30  | CRS | 15 | 366 | 2  | 0.066667 | 0.066667 |
| <b>LexA</b> | 29  | CRS | 15 | 366 | 13 | 0.448276 | 0.448276 |
| <b>IHF</b>  | 68  | CRS | 15 | 366 | 14 | 0.205882 | 0.205882 |
| <b>NsrR</b> | 32  | CRS | 15 | 366 | 10 | 0.3125   | 0.3125   |
| <b>CRP</b>  | 183 | CRS | 15 | 366 | 42 | 0.229508 | 0.229508 |
| <b>MarA</b> | 21  | CRS | 15 | 366 | 1  | 0.047619 | 0.047619 |
| <b>PhoP</b> | 29  | CRS | 15 | 366 | 4  | 0.137931 | 0.137931 |
| <b>ArcA</b> | 58  | CRS | 15 | 366 | 15 | 0.258621 | 0.258621 |
| <b>NarL</b> | 29  | CRS | 15 | 366 | 7  | 0.241379 | 0.241379 |
| <b>Fur</b>  | 45  | CRS | 15 | 366 | 19 | 0.422222 | 0.422222 |
| <b>CpxR</b> | 30  | CRS | 15 | 366 | 2  | 0.066667 | 0.066667 |
| <b>SoxS</b> | 21  | CRS | 15 | 366 | 0  | 0        | 0        |
| <b>Fis</b>  | 60  | CRS | 20 | 667 | 19 | 0.316667 | 0.316667 |
| <b>FNR</b>  | 95  | CRS | 20 | 667 | 42 | 0.442105 | 0.442105 |
| <b>H-NS</b> | 61  | CRS | 20 | 667 | 21 | 0.344262 | 0.344262 |
| <b>FruR</b> | 33  | CRS | 20 | 667 | 15 | 0.454545 | 0.454545 |
| <b>Lrp</b>  | 30  | CRS | 20 | 667 | 6  | 0.2      | 0.2      |
| <b>LexA</b> | 29  | CRS | 20 | 667 | 14 | 0.482759 | 0.482759 |
| <b>IHF</b>  | 68  | CRS | 20 | 667 | 22 | 0.323529 | 0.323529 |
| <b>NsrR</b> | 32  | CRS | 20 | 667 | 16 | 0.5      | 0.5      |
| <b>CRP</b>  | 183 | CRS | 20 | 667 | 70 | 0.382514 | 0.382514 |
| <b>MarA</b> | 21  | CRS | 20 | 667 | 5  | 0.238095 | 0.238095 |
| <b>PhoP</b> | 29  | CRS | 20 | 667 | 11 | 0.37931  | 0.37931  |
| <b>ArcA</b> | 58  | CRS | 20 | 667 | 28 | 0.482759 | 0.482759 |
| <b>NarL</b> | 29  | CRS | 20 | 667 | 11 | 0.37931  | 0.37931  |

|             |     |     |    |      |     |          |          |
|-------------|-----|-----|----|------|-----|----------|----------|
| <b>Fur</b>  | 45  | CRS | 20 | 667  | 28  | 0.622222 | 0.622222 |
| <b>CpxR</b> | 30  | CRS | 20 | 667  | 6   | 0.2      | 0.2      |
| <b>SoxS</b> | 21  | CRS | 20 | 667  | 3   | 0.142857 | 0.142857 |
| <b>Fis</b>  | 60  | CRS | 25 | 1110 | 29  | 0.483333 | 0.483333 |
| <b>FNR</b>  | 95  | CRS | 25 | 1110 | 61  | 0.642105 | 0.642105 |
| <b>H-NS</b> | 61  | CRS | 25 | 1110 | 40  | 0.655738 | 0.655738 |
| <b>FruR</b> | 33  | CRS | 25 | 1110 | 24  | 0.727273 | 0.727273 |
| <b>Lrp</b>  | 30  | CRS | 25 | 1110 | 18  | 0.6      | 0.6      |
| <b>LexA</b> | 29  | CRS | 25 | 1110 | 16  | 0.551724 | 0.551724 |
| <b>IHF</b>  | 68  | CRS | 25 | 1110 | 44  | 0.647059 | 0.647059 |
| <b>NsrR</b> | 32  | CRS | 25 | 1110 | 20  | 0.625    | 0.625    |
| <b>CRP</b>  | 183 | CRS | 25 | 1110 | 102 | 0.557377 | 0.557377 |
| <b>MarA</b> | 21  | CRS | 25 | 1110 | 11  | 0.52381  | 0.52381  |
| <b>PhoP</b> | 29  | CRS | 25 | 1110 | 20  | 0.689655 | 0.689655 |
| <b>ArcA</b> | 58  | CRS | 25 | 1110 | 36  | 0.62069  | 0.62069  |
| <b>NarL</b> | 29  | CRS | 25 | 1110 | 14  | 0.482759 | 0.482759 |
| <b>Fur</b>  | 45  | CRS | 25 | 1110 | 35  | 0.777778 | 0.777778 |
| <b>CpxR</b> | 30  | CRS | 25 | 1110 | 12  | 0.4      | 0.4      |
| <b>SoxS</b> | 21  | CRS | 25 | 1110 | 7   | 0.333333 | 0.333333 |
| <b>Fis</b>  | 60  | CRS | 30 | 1206 | 30  | 0.5      | 0.5      |
| <b>FNR</b>  | 95  | CRS | 30 | 1206 | 62  | 0.652632 | 0.652632 |
| <b>H-NS</b> | 61  | CRS | 30 | 1206 | 41  | 0.672131 | 0.672131 |
| <b>FruR</b> | 33  | CRS | 30 | 1206 | 24  | 0.727273 | 0.727273 |
| <b>Lrp</b>  | 30  | CRS | 30 | 1206 | 19  | 0.633333 | 0.633333 |
| <b>LexA</b> | 29  | CRS | 30 | 1206 | 16  | 0.551724 | 0.551724 |
| <b>IHF</b>  | 68  | CRS | 30 | 1206 | 46  | 0.676471 | 0.676471 |
| <b>NsrR</b> | 32  | CRS | 30 | 1206 | 21  | 0.65625  | 0.65625  |
| <b>CRP</b>  | 183 | CRS | 30 | 1206 | 109 | 0.595628 | 0.595628 |
| <b>MarA</b> | 21  | CRS | 30 | 1206 | 12  | 0.571429 | 0.571429 |
| <b>PhoP</b> | 29  | CRS | 30 | 1206 | 23  | 0.793103 | 0.793103 |
| <b>ArcA</b> | 58  | CRS | 30 | 1206 | 38  | 0.655172 | 0.655172 |
| <b>NarL</b> | 29  | CRS | 30 | 1206 | 15  | 0.517241 | 0.517241 |
| <b>Fur</b>  | 45  | CRS | 30 | 1206 | 36  | 0.8      | 0.8      |
| <b>CpxR</b> | 30  | CRS | 30 | 1206 | 15  | 0.5      | 0.5      |
| <b>SoxS</b> | 21  | CRS | 30 | 1206 | 7   | 0.333333 | 0.333333 |
| <b>Fis</b>  | 60  | CRS | 35 | 1353 | 35  | 0.583333 | 0.583333 |
| <b>FNR</b>  | 95  | CRS | 35 | 1353 | 67  | 0.705263 | 0.705263 |
| <b>H-NS</b> | 61  | CRS | 35 | 1353 | 46  | 0.754098 | 0.754098 |
| <b>FruR</b> | 33  | CRS | 35 | 1353 | 25  | 0.757576 | 0.757576 |
| <b>Lrp</b>  | 30  | CRS | 35 | 1353 | 20  | 0.666667 | 0.666667 |
| <b>LexA</b> | 29  | CRS | 35 | 1353 | 18  | 0.62069  | 0.62069  |
| <b>IHF</b>  | 68  | CRS | 35 | 1353 | 52  | 0.764706 | 0.764706 |
| <b>NsrR</b> | 32  | CRS | 35 | 1353 | 23  | 0.71875  | 0.71875  |
| <b>CRP</b>  | 183 | CRS | 35 | 1353 | 122 | 0.666667 | 0.666667 |
| <b>MarA</b> | 21  | CRS | 35 | 1353 | 13  | 0.619048 | 0.619048 |
| <b>PhoP</b> | 29  | CRS | 35 | 1353 | 24  | 0.827586 | 0.827586 |
| <b>ArcA</b> | 58  | CRS | 35 | 1353 | 41  | 0.706897 | 0.706897 |

|             |     |     |    |      |     |          |          |
|-------------|-----|-----|----|------|-----|----------|----------|
| <b>NarL</b> | 29  | CRS | 35 | 1353 | 17  | 0.586207 | 0.586207 |
| <b>Fur</b>  | 45  | CRS | 35 | 1353 | 38  | 0.844444 | 0.844444 |
| <b>CpxR</b> | 30  | CRS | 35 | 1353 | 15  | 0.5      | 0.5      |
| <b>SoxS</b> | 21  | CRS | 35 | 1353 | 9   | 0.428571 | 0.428571 |
| <b>Fis</b>  | 60  | CRS | 40 | 1426 | 36  | 0.6      | 0.6      |
| <b>FNR</b>  | 95  | CRS | 40 | 1426 | 69  | 0.726316 | 0.726316 |
| <b>H-NS</b> | 61  | CRS | 40 | 1426 | 49  | 0.803279 | 0.803279 |
| <b>FruR</b> | 33  | CRS | 40 | 1426 | 25  | 0.757576 | 0.757576 |
| <b>Lrp</b>  | 30  | CRS | 40 | 1426 | 20  | 0.666667 | 0.666667 |
| <b>LexA</b> | 29  | CRS | 40 | 1426 | 19  | 0.655172 | 0.655172 |
| <b>IHF</b>  | 68  | CRS | 40 | 1426 | 52  | 0.764706 | 0.764706 |
| <b>NsrR</b> | 32  | CRS | 40 | 1426 | 23  | 0.71875  | 0.71875  |
| <b>CRP</b>  | 183 | CRS | 40 | 1426 | 125 | 0.68306  | 0.68306  |
| <b>MarA</b> | 21  | CRS | 40 | 1426 | 13  | 0.619048 | 0.619048 |
| <b>PhoP</b> | 29  | CRS | 40 | 1426 | 24  | 0.827586 | 0.827586 |
| <b>ArcA</b> | 58  | CRS | 40 | 1426 | 41  | 0.706897 | 0.706897 |
| <b>NarL</b> | 29  | CRS | 40 | 1426 | 17  | 0.586207 | 0.586207 |
| <b>Fur</b>  | 45  | CRS | 40 | 1426 | 39  | 0.866667 | 0.866667 |
| <b>CpxR</b> | 30  | CRS | 40 | 1426 | 16  | 0.533333 | 0.533333 |
| <b>SoxS</b> | 21  | CRS | 40 | 1426 | 9   | 0.428571 | 0.428571 |
| <b>Fis</b>  | 60  | CRS | 45 | 1657 | 41  | 0.683333 | 0.683333 |
| <b>FNR</b>  | 95  | CRS | 45 | 1657 | 72  | 0.757895 | 0.757895 |
| <b>H-NS</b> | 61  | CRS | 45 | 1657 | 54  | 0.885246 | 0.885246 |
| <b>FruR</b> | 33  | CRS | 45 | 1657 | 29  | 0.878788 | 0.878788 |
| <b>Lrp</b>  | 30  | CRS | 45 | 1657 | 21  | 0.7      | 0.7      |
| <b>LexA</b> | 29  | CRS | 45 | 1657 | 20  | 0.689655 | 0.689655 |
| <b>IHF</b>  | 68  | CRS | 45 | 1657 | 56  | 0.823529 | 0.823529 |
| <b>NsrR</b> | 32  | CRS | 45 | 1657 | 24  | 0.75     | 0.75     |
| <b>CRP</b>  | 183 | CRS | 45 | 1657 | 131 | 0.715847 | 0.715847 |
| <b>MarA</b> | 21  | CRS | 45 | 1657 | 14  | 0.666667 | 0.666667 |
| <b>PhoP</b> | 29  | CRS | 45 | 1657 | 26  | 0.896552 | 0.896552 |
| <b>ArcA</b> | 58  | CRS | 45 | 1657 | 46  | 0.793103 | 0.793103 |
| <b>NarL</b> | 29  | CRS | 45 | 1657 | 19  | 0.655172 | 0.655172 |
| <b>Fur</b>  | 45  | CRS | 45 | 1657 | 39  | 0.866667 | 0.866667 |
| <b>CpxR</b> | 30  | CRS | 45 | 1657 | 19  | 0.633333 | 0.633333 |
| <b>SoxS</b> | 21  | CRS | 45 | 1657 | 11  | 0.52381  | 0.52381  |
| <b>Fis</b>  | 60  | CRS | 50 | 1786 | 43  | 0.716667 | 0.716667 |
| <b>FNR</b>  | 95  | CRS | 50 | 1786 | 74  | 0.778947 | 0.778947 |
| <b>H-NS</b> | 61  | CRS | 50 | 1786 | 55  | 0.901639 | 0.901639 |
| <b>FruR</b> | 33  | CRS | 50 | 1786 | 30  | 0.909091 | 0.909091 |
| <b>Lrp</b>  | 30  | CRS | 50 | 1786 | 23  | 0.766667 | 0.766667 |
| <b>LexA</b> | 29  | CRS | 50 | 1786 | 21  | 0.724138 | 0.724138 |
| <b>IHF</b>  | 68  | CRS | 50 | 1786 | 58  | 0.852941 | 0.852941 |
| <b>NsrR</b> | 32  | CRS | 50 | 1786 | 24  | 0.75     | 0.75     |
| <b>CRP</b>  | 183 | CRS | 50 | 1786 | 134 | 0.73224  | 0.73224  |
| <b>MarA</b> | 21  | CRS | 50 | 1786 | 15  | 0.714286 | 0.714286 |
| <b>PhoP</b> | 29  | CRS | 50 | 1786 | 26  | 0.896552 | 0.896552 |

|             |     |     |    |      |     |          |          |
|-------------|-----|-----|----|------|-----|----------|----------|
| <b>ArcA</b> | 58  | CRS | 50 | 1786 | 46  | 0.793103 | 0.793103 |
| <b>NarL</b> | 29  | CRS | 50 | 1786 | 19  | 0.655172 | 0.655172 |
| <b>Fur</b>  | 45  | CRS | 50 | 1786 | 39  | 0.866667 | 0.866667 |
| <b>CpxR</b> | 30  | CRS | 50 | 1786 | 20  | 0.666667 | 0.666667 |
| <b>SoxS</b> | 21  | CRS | 50 | 1786 | 12  | 0.571429 | 0.571429 |
| <b>Fis</b>  | 60  | CRS | 55 | 2021 | 47  | 0.783333 | 0.783333 |
| <b>FNR</b>  | 95  | CRS | 55 | 2021 | 81  | 0.852632 | 0.852632 |
| <b>H-NS</b> | 61  | CRS | 55 | 2021 | 58  | 0.95082  | 0.95082  |
| <b>FruR</b> | 33  | CRS | 55 | 2021 | 31  | 0.939394 | 0.939394 |
| <b>Lrp</b>  | 30  | CRS | 55 | 2021 | 24  | 0.8      | 0.8      |
| <b>LexA</b> | 29  | CRS | 55 | 2021 | 21  | 0.724138 | 0.724138 |
| <b>IHF</b>  | 68  | CRS | 55 | 2021 | 63  | 0.926471 | 0.926471 |
| <b>NsrR</b> | 32  | CRS | 55 | 2021 | 25  | 0.78125  | 0.78125  |
| <b>CRP</b>  | 183 | CRS | 55 | 2021 | 145 | 0.79235  | 0.79235  |
| <b>MarA</b> | 21  | CRS | 55 | 2021 | 15  | 0.714286 | 0.714286 |
| <b>PhoP</b> | 29  | CRS | 55 | 2021 | 27  | 0.931034 | 0.931034 |
| <b>ArcA</b> | 58  | CRS | 55 | 2021 | 51  | 0.87931  | 0.87931  |
| <b>NarL</b> | 29  | CRS | 55 | 2021 | 23  | 0.793103 | 0.793103 |
| <b>Fur</b>  | 45  | CRS | 55 | 2021 | 40  | 0.888889 | 0.888889 |
| <b>CpxR</b> | 30  | CRS | 55 | 2021 | 22  | 0.733333 | 0.733333 |
| <b>SoxS</b> | 21  | CRS | 55 | 2021 | 13  | 0.619048 | 0.619048 |
| <b>Fis</b>  | 60  | CRS | 60 | 2157 | 47  | 0.783333 | 0.783333 |
| <b>FNR</b>  | 95  | CRS | 60 | 2157 | 84  | 0.884211 | 0.884211 |
| <b>H-NS</b> | 61  | CRS | 60 | 2157 | 58  | 0.95082  | 0.95082  |
| <b>FruR</b> | 33  | CRS | 60 | 2157 | 32  | 0.969697 | 0.969697 |
| <b>Lrp</b>  | 30  | CRS | 60 | 2157 | 26  | 0.866667 | 0.866667 |
| <b>LexA</b> | 29  | CRS | 60 | 2157 | 25  | 0.862069 | 0.862069 |
| <b>IHF</b>  | 68  | CRS | 60 | 2157 | 65  | 0.955882 | 0.955882 |
| <b>NsrR</b> | 32  | CRS | 60 | 2157 | 27  | 0.84375  | 0.84375  |
| <b>CRP</b>  | 183 | CRS | 60 | 2157 | 150 | 0.819672 | 0.819672 |
| <b>MarA</b> | 21  | CRS | 60 | 2157 | 16  | 0.761905 | 0.761905 |
| <b>PhoP</b> | 29  | CRS | 60 | 2157 | 27  | 0.931034 | 0.931034 |
| <b>ArcA</b> | 58  | CRS | 60 | 2157 | 53  | 0.913793 | 0.913793 |
| <b>NarL</b> | 29  | CRS | 60 | 2157 | 24  | 0.827586 | 0.827586 |
| <b>Fur</b>  | 45  | CRS | 60 | 2157 | 40  | 0.888889 | 0.888889 |
| <b>CpxR</b> | 30  | CRS | 60 | 2157 | 23  | 0.766667 | 0.766667 |
| <b>SoxS</b> | 21  | CRS | 60 | 2157 | 15  | 0.714286 | 0.714286 |
| <b>Fis</b>  | 60  | CRS | 65 | 2239 | 49  | 0.816667 | 0.816667 |
| <b>FNR</b>  | 95  | CRS | 65 | 2239 | 86  | 0.905263 | 0.905263 |
| <b>H-NS</b> | 61  | CRS | 65 | 2239 | 58  | 0.95082  | 0.95082  |
| <b>FruR</b> | 33  | CRS | 65 | 2239 | 32  | 0.969697 | 0.969697 |
| <b>Lrp</b>  | 30  | CRS | 65 | 2239 | 26  | 0.866667 | 0.866667 |
| <b>LexA</b> | 29  | CRS | 65 | 2239 | 25  | 0.862069 | 0.862069 |
| <b>IHF</b>  | 68  | CRS | 65 | 2239 | 65  | 0.955882 | 0.955882 |
| <b>NsrR</b> | 32  | CRS | 65 | 2239 | 27  | 0.84375  | 0.84375  |
| <b>CRP</b>  | 183 | CRS | 65 | 2239 | 157 | 0.857923 | 0.857923 |
| <b>MarA</b> | 21  | CRS | 65 | 2239 | 17  | 0.809524 | 0.809524 |

|             |     |     |    |      |     |          |          |
|-------------|-----|-----|----|------|-----|----------|----------|
| <b>PhoP</b> | 29  | CRS | 65 | 2239 | 27  | 0.931034 | 0.931034 |
| <b>ArcA</b> | 58  | CRS | 65 | 2239 | 54  | 0.931034 | 0.931034 |
| <b>NarL</b> | 29  | CRS | 65 | 2239 | 24  | 0.827586 | 0.827586 |
| <b>Fur</b>  | 45  | CRS | 65 | 2239 | 41  | 0.911111 | 0.911111 |
| <b>CpxR</b> | 30  | CRS | 65 | 2239 | 24  | 0.8      | 0.8      |
| <b>SoxS</b> | 21  | CRS | 65 | 2239 | 16  | 0.761905 | 0.761905 |
| <b>Fis</b>  | 60  | CRS | 70 | 2360 | 50  | 0.833333 | 0.833333 |
| <b>FNR</b>  | 95  | CRS | 70 | 2360 | 87  | 0.915789 | 0.915789 |
| <b>H-NS</b> | 61  | CRS | 70 | 2360 | 59  | 0.967213 | 0.967213 |
| <b>FruR</b> | 33  | CRS | 70 | 2360 | 33  | 1        | 1        |
| <b>Lrp</b>  | 30  | CRS | 70 | 2360 | 26  | 0.866667 | 0.866667 |
| <b>LexA</b> | 29  | CRS | 70 | 2360 | 26  | 0.896552 | 0.896552 |
| <b>IHF</b>  | 68  | CRS | 70 | 2360 | 67  | 0.985294 | 0.985294 |
| <b>NsrR</b> | 32  | CRS | 70 | 2360 | 28  | 0.875    | 0.875    |
| <b>CRP</b>  | 183 | CRS | 70 | 2360 | 163 | 0.89071  | 0.89071  |
| <b>MarA</b> | 21  | CRS | 70 | 2360 | 17  | 0.809524 | 0.809524 |
| <b>PhoP</b> | 29  | CRS | 70 | 2360 | 27  | 0.931034 | 0.931034 |
| <b>ArcA</b> | 58  | CRS | 70 | 2360 | 54  | 0.931034 | 0.931034 |
| <b>NarL</b> | 29  | CRS | 70 | 2360 | 24  | 0.827586 | 0.827586 |
| <b>Fur</b>  | 45  | CRS | 70 | 2360 | 43  | 0.955556 | 0.955556 |
| <b>CpxR</b> | 30  | CRS | 70 | 2360 | 24  | 0.8      | 0.8      |
| <b>SoxS</b> | 21  | CRS | 70 | 2360 | 16  | 0.761905 | 0.761905 |
| <b>Fis</b>  | 60  | CRS | 75 | 2430 | 51  | 0.85     | 0.85     |
| <b>FNR</b>  | 95  | CRS | 75 | 2430 | 87  | 0.915789 | 0.915789 |
| <b>H-NS</b> | 61  | CRS | 75 | 2430 | 59  | 0.967213 | 0.967213 |
| <b>FruR</b> | 33  | CRS | 75 | 2430 | 33  | 1        | 1        |
| <b>Lrp</b>  | 30  | CRS | 75 | 2430 | 27  | 0.9      | 0.9      |
| <b>LexA</b> | 29  | CRS | 75 | 2430 | 27  | 0.931034 | 0.931034 |
| <b>IHF</b>  | 68  | CRS | 75 | 2430 | 67  | 0.985294 | 0.985294 |
| <b>NsrR</b> | 32  | CRS | 75 | 2430 | 29  | 0.90625  | 0.90625  |
| <b>CRP</b>  | 183 | CRS | 75 | 2430 | 165 | 0.901639 | 0.901639 |
| <b>MarA</b> | 21  | CRS | 75 | 2430 | 18  | 0.857143 | 0.857143 |
| <b>PhoP</b> | 29  | CRS | 75 | 2430 | 27  | 0.931034 | 0.931034 |
| <b>ArcA</b> | 58  | CRS | 75 | 2430 | 54  | 0.931034 | 0.931034 |
| <b>NarL</b> | 29  | CRS | 75 | 2430 | 24  | 0.827586 | 0.827586 |
| <b>Fur</b>  | 45  | CRS | 75 | 2430 | 43  | 0.955556 | 0.955556 |
| <b>CpxR</b> | 30  | CRS | 75 | 2430 | 24  | 0.8      | 0.8      |
| <b>SoxS</b> | 21  | CRS | 75 | 2430 | 17  | 0.809524 | 0.809524 |
| <b>Fis</b>  | 60  | CRS | 80 | 2467 | 52  | 0.866667 | 0.866667 |
| <b>FNR</b>  | 95  | CRS | 80 | 2467 | 87  | 0.915789 | 0.915789 |
| <b>H-NS</b> | 61  | CRS | 80 | 2467 | 59  | 0.967213 | 0.967213 |
| <b>FruR</b> | 33  | CRS | 80 | 2467 | 33  | 1        | 1        |
| <b>Lrp</b>  | 30  | CRS | 80 | 2467 | 28  | 0.933333 | 0.933333 |
| <b>LexA</b> | 29  | CRS | 80 | 2467 | 28  | 0.965517 | 0.965517 |
| <b>IHF</b>  | 68  | CRS | 80 | 2467 | 67  | 0.985294 | 0.985294 |
| <b>NsrR</b> | 32  | CRS | 80 | 2467 | 29  | 0.90625  | 0.90625  |
| <b>CRP</b>  | 183 | CRS | 80 | 2467 | 166 | 0.907104 | 0.907104 |

|             |     |     |    |      |     |          |          |
|-------------|-----|-----|----|------|-----|----------|----------|
| <b>MarA</b> | 21  | CRS | 80 | 2467 | 18  | 0.857143 | 0.857143 |
| <b>PhoP</b> | 29  | CRS | 80 | 2467 | 28  | 0.965517 | 0.965517 |
| <b>ArcA</b> | 58  | CRS | 80 | 2467 | 54  | 0.931034 | 0.931034 |
| <b>NarL</b> | 29  | CRS | 80 | 2467 | 24  | 0.827586 | 0.827586 |
| <b>Fur</b>  | 45  | CRS | 80 | 2467 | 43  | 0.955556 | 0.955556 |
| <b>CpxR</b> | 30  | CRS | 80 | 2467 | 24  | 0.8      | 0.8      |
| <b>SoxS</b> | 21  | CRS | 80 | 2467 | 18  | 0.857143 | 0.857143 |
| <b>Fis</b>  | 60  | CRS | 85 | 2483 | 52  | 0.866667 | 0.866667 |
| <b>FNR</b>  | 95  | CRS | 85 | 2483 | 88  | 0.926316 | 0.926316 |
| <b>H-NS</b> | 61  | CRS | 85 | 2483 | 59  | 0.967213 | 0.967213 |
| <b>FruR</b> | 33  | CRS | 85 | 2483 | 33  | 1        | 1        |
| <b>Lrp</b>  | 30  | CRS | 85 | 2483 | 28  | 0.933333 | 0.933333 |
| <b>LexA</b> | 29  | CRS | 85 | 2483 | 28  | 0.965517 | 0.965517 |
| <b>IHF</b>  | 68  | CRS | 85 | 2483 | 68  | 1        | 1        |
| <b>NsrR</b> | 32  | CRS | 85 | 2483 | 29  | 0.90625  | 0.90625  |
| <b>CRP</b>  | 183 | CRS | 85 | 2483 | 166 | 0.907104 | 0.907104 |
| <b>MarA</b> | 21  | CRS | 85 | 2483 | 18  | 0.857143 | 0.857143 |
| <b>PhoP</b> | 29  | CRS | 85 | 2483 | 28  | 0.965517 | 0.965517 |
| <b>ArcA</b> | 58  | CRS | 85 | 2483 | 55  | 0.948276 | 0.948276 |
| <b>NarL</b> | 29  | CRS | 85 | 2483 | 25  | 0.862069 | 0.862069 |
| <b>Fur</b>  | 45  | CRS | 85 | 2483 | 43  | 0.955556 | 0.955556 |
| <b>CpxR</b> | 30  | CRS | 85 | 2483 | 24  | 0.8      | 0.8      |
| <b>SoxS</b> | 21  | CRS | 85 | 2483 | 18  | 0.857143 | 0.857143 |
| <b>Fis</b>  | 60  | CRS | 90 | 2565 | 55  | 0.916667 | 0.916667 |
| <b>FNR</b>  | 95  | CRS | 90 | 2565 | 90  | 0.947368 | 0.947368 |
| <b>H-NS</b> | 61  | CRS | 90 | 2565 | 59  | 0.967213 | 0.967213 |
| <b>FruR</b> | 33  | CRS | 90 | 2565 | 33  | 1        | 1        |
| <b>Lrp</b>  | 30  | CRS | 90 | 2565 | 29  | 0.966667 | 0.966667 |
| <b>LexA</b> | 29  | CRS | 90 | 2565 | 28  | 0.965517 | 0.965517 |
| <b>IHF</b>  | 68  | CRS | 90 | 2565 | 68  | 1        | 1        |
| <b>NsrR</b> | 32  | CRS | 90 | 2565 | 30  | 0.9375   | 0.9375   |
| <b>CRP</b>  | 183 | CRS | 90 | 2565 | 174 | 0.95082  | 0.95082  |
| <b>MarA</b> | 21  | CRS | 90 | 2565 | 18  | 0.857143 | 0.857143 |
| <b>PhoP</b> | 29  | CRS | 90 | 2565 | 28  | 0.965517 | 0.965517 |
| <b>ArcA</b> | 58  | CRS | 90 | 2565 | 55  | 0.948276 | 0.948276 |
| <b>NarL</b> | 29  | CRS | 90 | 2565 | 27  | 0.931034 | 0.931034 |
| <b>Fur</b>  | 45  | CRS | 90 | 2565 | 43  | 0.955556 | 0.955556 |
| <b>CpxR</b> | 30  | CRS | 90 | 2565 | 25  | 0.833333 | 0.833333 |
| <b>SoxS</b> | 21  | CRS | 90 | 2565 | 18  | 0.857143 | 0.857143 |
| <b>Fis</b>  | 60  | CRS | 95 | 2614 | 56  | 0.933333 | 0.933333 |
| <b>FNR</b>  | 95  | CRS | 95 | 2614 | 91  | 0.957895 | 0.957895 |
| <b>H-NS</b> | 61  | CRS | 95 | 2614 | 59  | 0.967213 | 0.967213 |
| <b>FruR</b> | 33  | CRS | 95 | 2614 | 33  | 1        | 1        |
| <b>Lrp</b>  | 30  | CRS | 95 | 2614 | 29  | 0.966667 | 0.966667 |
| <b>LexA</b> | 29  | CRS | 95 | 2614 | 28  | 0.965517 | 0.965517 |
| <b>IHF</b>  | 68  | CRS | 95 | 2614 | 68  | 1        | 1        |
| <b>NsrR</b> | 32  | CRS | 95 | 2614 | 30  | 0.9375   | 0.9375   |

|             |     |     |     |      |     |          |          |
|-------------|-----|-----|-----|------|-----|----------|----------|
| <b>CRP</b>  | 183 | CRS | 95  | 2614 | 175 | 0.956284 | 0.956284 |
| <b>MarA</b> | 21  | CRS | 95  | 2614 | 19  | 0.904762 | 0.904762 |
| <b>PhoP</b> | 29  | CRS | 95  | 2614 | 28  | 0.965517 | 0.965517 |
| <b>ArcA</b> | 58  | CRS | 95  | 2614 | 55  | 0.948276 | 0.948276 |
| <b>NarL</b> | 29  | CRS | 95  | 2614 | 27  | 0.931034 | 0.931034 |
| <b>Fur</b>  | 45  | CRS | 95  | 2614 | 43  | 0.955556 | 0.955556 |
| <b>CpxR</b> | 30  | CRS | 95  | 2614 | 27  | 0.9      | 0.9      |
| <b>SoxS</b> | 21  | CRS | 95  | 2614 | 19  | 0.904762 | 0.904762 |
| <b>Fis</b>  | 60  | CRS | 100 | 2634 | 56  | 0.933333 | 0.933333 |
| <b>FNR</b>  | 95  | CRS | 100 | 2634 | 91  | 0.957895 | 0.957895 |
| <b>H-NS</b> | 61  | CRS | 100 | 2634 | 59  | 0.967213 | 0.967213 |
| <b>FruR</b> | 33  | CRS | 100 | 2634 | 33  | 1        | 1        |
| <b>Lrp</b>  | 30  | CRS | 100 | 2634 | 29  | 0.966667 | 0.966667 |
| <b>LexA</b> | 29  | CRS | 100 | 2634 | 28  | 0.965517 | 0.965517 |
| <b>IHF</b>  | 68  | CRS | 100 | 2634 | 68  | 1        | 1        |
| <b>NsrR</b> | 32  | CRS | 100 | 2634 | 30  | 0.9375   | 0.9375   |
| <b>CRP</b>  | 183 | CRS | 100 | 2634 | 175 | 0.956284 | 0.956284 |
| <b>MarA</b> | 21  | CRS | 100 | 2634 | 19  | 0.904762 | 0.904762 |
| <b>PhoP</b> | 29  | CRS | 100 | 2634 | 28  | 0.965517 | 0.965517 |
| <b>ArcA</b> | 58  | CRS | 100 | 2634 | 55  | 0.948276 | 0.948276 |
| <b>NarL</b> | 29  | CRS | 100 | 2634 | 27  | 0.931034 | 0.931034 |
| <b>Fur</b>  | 45  | CRS | 100 | 2634 | 43  | 0.955556 | 0.955556 |
| <b>CpxR</b> | 30  | CRS | 100 | 2634 | 27  | 0.9      | 0.9      |
| <b>SoxS</b> | 21  | CRS | 100 | 2634 | 19  | 0.904762 | 0.904762 |
| <b>Fis</b>  | 60  | GFR | 5   | 32   | 1   | 0.016667 | 0.03125  |
| <b>FNR</b>  | 95  | GFR | 5   | 32   | 4   | 0.042105 | 0.125    |
| <b>H-NS</b> | 61  | GFR | 5   | 32   | 0   | 0        | 0        |
| <b>FruR</b> | 33  | GFR | 5   | 32   | 0   | 0        | 0        |
| <b>Lrp</b>  | 30  | GFR | 5   | 32   | 1   | 0.033333 | 0.033333 |
| <b>LexA</b> | 29  | GFR | 5   | 32   | 0   | 0        | 0        |
| <b>IHF</b>  | 68  | GFR | 5   | 32   | 1   | 0.014706 | 0.03125  |
| <b>NsrR</b> | 32  | GFR | 5   | 32   | 0   | 0        | 0        |
| <b>CRP</b>  | 183 | GFR | 5   | 32   | 2   | 0.010929 | 0.0625   |
| <b>MarA</b> | 21  | GFR | 5   | 32   | 0   | 0        | 0        |
| <b>PhoP</b> | 29  | GFR | 5   | 32   | 0   | 0        | 0        |
| <b>ArcA</b> | 58  | GFR | 5   | 32   | 0   | 0        | 0        |
| <b>NarL</b> | 29  | GFR | 5   | 32   | 0   | 0        | 0        |
| <b>Fur</b>  | 45  | GFR | 5   | 32   | 1   | 0.022222 | 0.03125  |
| <b>CpxR</b> | 30  | GFR | 5   | 32   | 0   | 0        | 0        |
| <b>SoxS</b> | 21  | GFR | 5   | 32   | 0   | 0        | 0        |
| <b>Fis</b>  | 60  | GFR | 10  | 81   | 5   | 0.083333 | 0.083333 |
| <b>FNR</b>  | 95  | GFR | 10  | 81   | 6   | 0.063158 | 0.074074 |
| <b>H-NS</b> | 61  | GFR | 10  | 81   | 0   | 0        | 0        |
| <b>FruR</b> | 33  | GFR | 10  | 81   | 7   | 0.212121 | 0.212121 |
| <b>Lrp</b>  | 30  | GFR | 10  | 81   | 3   | 0.1      | 0.1      |
| <b>LexA</b> | 29  | GFR | 10  | 81   | 0   | 0        | 0        |
| <b>IHF</b>  | 68  | GFR | 10  | 81   | 3   | 0.044118 | 0.044118 |



|             |     |     |    |     |    |          |          |
|-------------|-----|-----|----|-----|----|----------|----------|
| <b>NsrR</b> | 32  | GFR | 10 | 81  | 0  | 0        | 0        |
| <b>CRP</b>  | 183 | GFR | 10 | 81  | 8  | 0.043716 | 0.098765 |
| <b>MarA</b> | 21  | GFR | 10 | 81  | 0  | 0        | 0        |
| <b>PhoP</b> | 29  | GFR | 10 | 81  | 1  | 0.034483 | 0.034483 |
| <b>ArcA</b> | 58  | GFR | 10 | 81  | 1  | 0.017241 | 0.017241 |
| <b>NarL</b> | 29  | GFR | 10 | 81  | 1  | 0.034483 | 0.034483 |
| <b>Fur</b>  | 45  | GFR | 10 | 81  | 2  | 0.044444 | 0.044444 |
| <b>CpxR</b> | 30  | GFR | 10 | 81  | 0  | 0        | 0        |
| <b>SoxS</b> | 21  | GFR | 10 | 81  | 2  | 0.095238 | 0.095238 |
| <b>Fis</b>  | 60  | GFR | 15 | 117 | 8  | 0.133333 | 0.133333 |
| <b>FNR</b>  | 95  | GFR | 15 | 117 | 7  | 0.073684 | 0.073684 |
| <b>H-NS</b> | 61  | GFR | 15 | 117 | 0  | 0        | 0        |
| <b>FruR</b> | 33  | GFR | 15 | 117 | 7  | 0.212121 | 0.212121 |
| <b>Lrp</b>  | 30  | GFR | 15 | 117 | 3  | 0.1      | 0.1      |
| <b>LexA</b> | 29  | GFR | 15 | 117 | 0  | 0        | 0        |
| <b>IHF</b>  | 68  | GFR | 15 | 117 | 3  | 0.044118 | 0.044118 |
| <b>NsrR</b> | 32  | GFR | 15 | 117 | 0  | 0        | 0        |
| <b>CRP</b>  | 183 | GFR | 15 | 117 | 10 | 0.054645 | 0.08547  |
| <b>MarA</b> | 21  | GFR | 15 | 117 | 1  | 0.047619 | 0.047619 |
| <b>PhoP</b> | 29  | GFR | 15 | 117 | 1  | 0.034483 | 0.034483 |
| <b>ArcA</b> | 58  | GFR | 15 | 117 | 1  | 0.017241 | 0.017241 |
| <b>NarL</b> | 29  | GFR | 15 | 117 | 1  | 0.034483 | 0.034483 |
| <b>Fur</b>  | 45  | GFR | 15 | 117 | 2  | 0.044444 | 0.044444 |
| <b>CpxR</b> | 30  | GFR | 15 | 117 | 1  | 0.033333 | 0.033333 |
| <b>SoxS</b> | 21  | GFR | 15 | 117 | 2  | 0.095238 | 0.095238 |
| <b>Fis</b>  | 60  | GFR | 20 | 161 | 9  | 0.15     | 0.15     |
| <b>FNR</b>  | 95  | GFR | 20 | 161 | 9  | 0.094737 | 0.094737 |
| <b>H-NS</b> | 61  | GFR | 20 | 161 | 1  | 0.016393 | 0.016393 |
| <b>FruR</b> | 33  | GFR | 20 | 161 | 7  | 0.212121 | 0.212121 |
| <b>Lrp</b>  | 30  | GFR | 20 | 161 | 5  | 0.166667 | 0.166667 |
| <b>LexA</b> | 29  | GFR | 20 | 161 | 7  | 0.241379 | 0.241379 |
| <b>IHF</b>  | 68  | GFR | 20 | 161 | 3  | 0.044118 | 0.044118 |
| <b>NsrR</b> | 32  | GFR | 20 | 161 | 1  | 0.03125  | 0.03125  |
| <b>CRP</b>  | 183 | GFR | 20 | 161 | 11 | 0.060109 | 0.068323 |
| <b>MarA</b> | 21  | GFR | 20 | 161 | 1  | 0.047619 | 0.047619 |
| <b>PhoP</b> | 29  | GFR | 20 | 161 | 1  | 0.034483 | 0.034483 |
| <b>ArcA</b> | 58  | GFR | 20 | 161 | 4  | 0.068966 | 0.068966 |
| <b>NarL</b> | 29  | GFR | 20 | 161 | 1  | 0.034483 | 0.034483 |
| <b>Fur</b>  | 45  | GFR | 20 | 161 | 2  | 0.044444 | 0.044444 |
| <b>CpxR</b> | 30  | GFR | 20 | 161 | 2  | 0.066667 | 0.066667 |
| <b>SoxS</b> | 21  | GFR | 20 | 161 | 2  | 0.095238 | 0.095238 |
| <b>Fis</b>  | 60  | GFR | 25 | 206 | 12 | 0.2      | 0.2      |
| <b>FNR</b>  | 95  | GFR | 25 | 206 | 9  | 0.094737 | 0.094737 |
| <b>H-NS</b> | 61  | GFR | 25 | 206 | 3  | 0.04918  | 0.04918  |
| <b>FruR</b> | 33  | GFR | 25 | 206 | 7  | 0.212121 | 0.212121 |
| <b>Lrp</b>  | 30  | GFR | 25 | 206 | 6  | 0.2      | 0.2      |
| <b>LexA</b> | 29  | GFR | 25 | 206 | 7  | 0.241379 | 0.241379 |

|             |     |     |    |     |    |          |          |
|-------------|-----|-----|----|-----|----|----------|----------|
| <b>IHF</b>  | 68  | GFR | 25 | 206 | 4  | 0.058824 | 0.058824 |
| <b>NsrR</b> | 32  | GFR | 25 | 206 | 1  | 0.03125  | 0.03125  |
| <b>CRP</b>  | 183 | GFR | 25 | 206 | 19 | 0.103825 | 0.103825 |
| <b>MarA</b> | 21  | GFR | 25 | 206 | 1  | 0.047619 | 0.047619 |
| <b>PhoP</b> | 29  | GFR | 25 | 206 | 2  | 0.068966 | 0.068966 |
| <b>ArcA</b> | 58  | GFR | 25 | 206 | 5  | 0.086207 | 0.086207 |
| <b>NarL</b> | 29  | GFR | 25 | 206 | 1  | 0.034483 | 0.034483 |
| <b>Fur</b>  | 45  | GFR | 25 | 206 | 4  | 0.088889 | 0.088889 |
| <b>CpxR</b> | 30  | GFR | 25 | 206 | 3  | 0.1      | 0.1      |
| <b>SoxS</b> | 21  | GFR | 25 | 206 | 2  | 0.095238 | 0.095238 |
| <b>Fis</b>  | 60  | GFR | 30 | 252 | 12 | 0.2      | 0.2      |
| <b>FNR</b>  | 95  | GFR | 30 | 252 | 12 | 0.126316 | 0.126316 |
| <b>H-NS</b> | 61  | GFR | 30 | 252 | 6  | 0.098361 | 0.098361 |
| <b>FruR</b> | 33  | GFR | 30 | 252 | 9  | 0.272727 | 0.272727 |
| <b>Lrp</b>  | 30  | GFR | 30 | 252 | 7  | 0.233333 | 0.233333 |
| <b>LexA</b> | 29  | GFR | 30 | 252 | 7  | 0.241379 | 0.241379 |
| <b>IHF</b>  | 68  | GFR | 30 | 252 | 4  | 0.058824 | 0.058824 |
| <b>NsrR</b> | 32  | GFR | 30 | 252 | 1  | 0.03125  | 0.03125  |
| <b>CRP</b>  | 183 | GFR | 30 | 252 | 23 | 0.125683 | 0.125683 |
| <b>MarA</b> | 21  | GFR | 30 | 252 | 2  | 0.095238 | 0.095238 |
| <b>PhoP</b> | 29  | GFR | 30 | 252 | 4  | 0.137931 | 0.137931 |
| <b>ArcA</b> | 58  | GFR | 30 | 252 | 7  | 0.12069  | 0.12069  |
| <b>NarL</b> | 29  | GFR | 30 | 252 | 2  | 0.068966 | 0.068966 |
| <b>Fur</b>  | 45  | GFR | 30 | 252 | 5  | 0.111111 | 0.111111 |
| <b>CpxR</b> | 30  | GFR | 30 | 252 | 3  | 0.1      | 0.1      |
| <b>SoxS</b> | 21  | GFR | 30 | 252 | 3  | 0.142857 | 0.142857 |
| <b>Fis</b>  | 60  | GFR | 35 | 282 | 12 | 0.2      | 0.2      |
| <b>FNR</b>  | 95  | GFR | 35 | 282 | 15 | 0.157895 | 0.157895 |
| <b>H-NS</b> | 61  | GFR | 35 | 282 | 9  | 0.147541 | 0.147541 |
| <b>FruR</b> | 33  | GFR | 35 | 282 | 10 | 0.30303  | 0.30303  |
| <b>Lrp</b>  | 30  | GFR | 35 | 282 | 7  | 0.233333 | 0.233333 |
| <b>LexA</b> | 29  | GFR | 35 | 282 | 7  | 0.241379 | 0.241379 |
| <b>IHF</b>  | 68  | GFR | 35 | 282 | 6  | 0.088235 | 0.088235 |
| <b>NsrR</b> | 32  | GFR | 35 | 282 | 1  | 0.03125  | 0.03125  |
| <b>CRP</b>  | 183 | GFR | 35 | 282 | 24 | 0.131148 | 0.131148 |
| <b>MarA</b> | 21  | GFR | 35 | 282 | 3  | 0.142857 | 0.142857 |
| <b>PhoP</b> | 29  | GFR | 35 | 282 | 4  | 0.137931 | 0.137931 |
| <b>ArcA</b> | 58  | GFR | 35 | 282 | 8  | 0.137931 | 0.137931 |
| <b>NarL</b> | 29  | GFR | 35 | 282 | 3  | 0.103448 | 0.103448 |
| <b>Fur</b>  | 45  | GFR | 35 | 282 | 11 | 0.244444 | 0.244444 |
| <b>CpxR</b> | 30  | GFR | 35 | 282 | 3  | 0.1      | 0.1      |
| <b>SoxS</b> | 21  | GFR | 35 | 282 | 4  | 0.190476 | 0.190476 |
| <b>Fis</b>  | 60  | GFR | 40 | 304 | 14 | 0.233333 | 0.233333 |
| <b>FNR</b>  | 95  | GFR | 40 | 304 | 16 | 0.168421 | 0.168421 |
| <b>H-NS</b> | 61  | GFR | 40 | 304 | 10 | 0.163934 | 0.163934 |
| <b>FruR</b> | 33  | GFR | 40 | 304 | 10 | 0.30303  | 0.30303  |
| <b>Lrp</b>  | 30  | GFR | 40 | 304 | 8  | 0.266667 | 0.266667 |

|             |     |     |    |     |    |          |          |
|-------------|-----|-----|----|-----|----|----------|----------|
| <b>LexA</b> | 29  | GFR | 40 | 304 | 7  | 0.241379 | 0.241379 |
| <b>IHF</b>  | 68  | GFR | 40 | 304 | 7  | 0.102941 | 0.102941 |
| <b>NsrR</b> | 32  | GFR | 40 | 304 | 1  | 0.03125  | 0.03125  |
| <b>CRP</b>  | 183 | GFR | 40 | 304 | 27 | 0.147541 | 0.147541 |
| <b>MarA</b> | 21  | GFR | 40 | 304 | 3  | 0.142857 | 0.142857 |
| <b>PhoP</b> | 29  | GFR | 40 | 304 | 4  | 0.137931 | 0.137931 |
| <b>ArcA</b> | 58  | GFR | 40 | 304 | 9  | 0.155172 | 0.155172 |
| <b>NarL</b> | 29  | GFR | 40 | 304 | 3  | 0.103448 | 0.103448 |
| <b>Fur</b>  | 45  | GFR | 40 | 304 | 13 | 0.288889 | 0.288889 |
| <b>CpxR</b> | 30  | GFR | 40 | 304 | 4  | 0.133333 | 0.133333 |
| <b>SoxS</b> | 21  | GFR | 40 | 304 | 4  | 0.190476 | 0.190476 |
| <b>Fis</b>  | 60  | GFR | 45 | 329 | 14 | 0.233333 | 0.233333 |
| <b>FNR</b>  | 95  | GFR | 45 | 329 | 17 | 0.178947 | 0.178947 |
| <b>H-NS</b> | 61  | GFR | 45 | 329 | 11 | 0.180328 | 0.180328 |
| <b>FruR</b> | 33  | GFR | 45 | 329 | 11 | 0.333333 | 0.333333 |
| <b>Lrp</b>  | 30  | GFR | 45 | 329 | 8  | 0.266667 | 0.266667 |
| <b>LexA</b> | 29  | GFR | 45 | 329 | 7  | 0.241379 | 0.241379 |
| <b>IHF</b>  | 68  | GFR | 45 | 329 | 8  | 0.117647 | 0.117647 |
| <b>NsrR</b> | 32  | GFR | 45 | 329 | 1  | 0.03125  | 0.03125  |
| <b>CRP</b>  | 183 | GFR | 45 | 329 | 29 | 0.15847  | 0.15847  |
| <b>MarA</b> | 21  | GFR | 45 | 329 | 3  | 0.142857 | 0.142857 |
| <b>PhoP</b> | 29  | GFR | 45 | 329 | 4  | 0.137931 | 0.137931 |
| <b>ArcA</b> | 58  | GFR | 45 | 329 | 10 | 0.172414 | 0.172414 |
| <b>NarL</b> | 29  | GFR | 45 | 329 | 3  | 0.103448 | 0.103448 |
| <b>Fur</b>  | 45  | GFR | 45 | 329 | 13 | 0.288889 | 0.288889 |
| <b>CpxR</b> | 30  | GFR | 45 | 329 | 4  | 0.133333 | 0.133333 |
| <b>SoxS</b> | 21  | GFR | 45 | 329 | 4  | 0.190476 | 0.190476 |
| <b>Fis</b>  | 60  | GFR | 50 | 350 | 15 | 0.25     | 0.25     |
| <b>FNR</b>  | 95  | GFR | 50 | 350 | 17 | 0.178947 | 0.178947 |
| <b>H-NS</b> | 61  | GFR | 50 | 350 | 11 | 0.180328 | 0.180328 |
| <b>FruR</b> | 33  | GFR | 50 | 350 | 11 | 0.333333 | 0.333333 |
| <b>Lrp</b>  | 30  | GFR | 50 | 350 | 9  | 0.3      | 0.3      |
| <b>LexA</b> | 29  | GFR | 50 | 350 | 7  | 0.241379 | 0.241379 |
| <b>IHF</b>  | 68  | GFR | 50 | 350 | 8  | 0.117647 | 0.117647 |
| <b>NsrR</b> | 32  | GFR | 50 | 350 | 1  | 0.03125  | 0.03125  |
| <b>CRP</b>  | 183 | GFR | 50 | 350 | 31 | 0.169399 | 0.169399 |
| <b>MarA</b> | 21  | GFR | 50 | 350 | 3  | 0.142857 | 0.142857 |
| <b>PhoP</b> | 29  | GFR | 50 | 350 | 5  | 0.172414 | 0.172414 |
| <b>ArcA</b> | 58  | GFR | 50 | 350 | 10 | 0.172414 | 0.172414 |
| <b>NarL</b> | 29  | GFR | 50 | 350 | 3  | 0.103448 | 0.103448 |
| <b>Fur</b>  | 45  | GFR | 50 | 350 | 13 | 0.288889 | 0.288889 |
| <b>CpxR</b> | 30  | GFR | 50 | 350 | 4  | 0.133333 | 0.133333 |
| <b>SoxS</b> | 21  | GFR | 50 | 350 | 4  | 0.190476 | 0.190476 |
| <b>Fis</b>  | 60  | GFR | 55 | 386 | 15 | 0.25     | 0.25     |
| <b>FNR</b>  | 95  | GFR | 55 | 386 | 19 | 0.2      | 0.2      |
| <b>H-NS</b> | 61  | GFR | 55 | 386 | 12 | 0.196721 | 0.196721 |
| <b>FruR</b> | 33  | GFR | 55 | 386 | 12 | 0.363636 | 0.363636 |

|             |     |     |    |     |    |          |          |
|-------------|-----|-----|----|-----|----|----------|----------|
| <b>Lrp</b>  | 30  | GFR | 55 | 386 | 9  | 0.3      | 0.3      |
| <b>LexA</b> | 29  | GFR | 55 | 386 | 7  | 0.241379 | 0.241379 |
| <b>IHF</b>  | 68  | GFR | 55 | 386 | 11 | 0.161765 | 0.161765 |
| <b>NsrR</b> | 32  | GFR | 55 | 386 | 1  | 0.03125  | 0.03125  |
| <b>CRP</b>  | 183 | GFR | 55 | 386 | 37 | 0.202186 | 0.202186 |
| <b>MarA</b> | 21  | GFR | 55 | 386 | 3  | 0.142857 | 0.142857 |
| <b>PhoP</b> | 29  | GFR | 55 | 386 | 6  | 0.206897 | 0.206897 |
| <b>ArcA</b> | 58  | GFR | 55 | 386 | 11 | 0.189655 | 0.189655 |
| <b>NarL</b> | 29  | GFR | 55 | 386 | 4  | 0.137931 | 0.137931 |
| <b>Fur</b>  | 45  | GFR | 55 | 386 | 18 | 0.4      | 0.4      |
| <b>CpxR</b> | 30  | GFR | 55 | 386 | 4  | 0.133333 | 0.133333 |
| <b>SoxS</b> | 21  | GFR | 55 | 386 | 4  | 0.190476 | 0.190476 |
| <b>Fis</b>  | 60  | GFR | 60 | 407 | 15 | 0.25     | 0.25     |
| <b>FNR</b>  | 95  | GFR | 60 | 407 | 20 | 0.210526 | 0.210526 |
| <b>H-NS</b> | 61  | GFR | 60 | 407 | 12 | 0.196721 | 0.196721 |
| <b>FruR</b> | 33  | GFR | 60 | 407 | 12 | 0.363636 | 0.363636 |
| <b>Lrp</b>  | 30  | GFR | 60 | 407 | 9  | 0.3      | 0.3      |
| <b>LexA</b> | 29  | GFR | 60 | 407 | 8  | 0.275862 | 0.275862 |
| <b>IHF</b>  | 68  | GFR | 60 | 407 | 12 | 0.176471 | 0.176471 |
| <b>NsrR</b> | 32  | GFR | 60 | 407 | 1  | 0.03125  | 0.03125  |
| <b>CRP</b>  | 183 | GFR | 60 | 407 | 39 | 0.213115 | 0.213115 |
| <b>MarA</b> | 21  | GFR | 60 | 407 | 4  | 0.190476 | 0.190476 |
| <b>PhoP</b> | 29  | GFR | 60 | 407 | 6  | 0.206897 | 0.206897 |
| <b>ArcA</b> | 58  | GFR | 60 | 407 | 12 | 0.206897 | 0.206897 |
| <b>NarL</b> | 29  | GFR | 60 | 407 | 4  | 0.137931 | 0.137931 |
| <b>Fur</b>  | 45  | GFR | 60 | 407 | 21 | 0.466667 | 0.466667 |
| <b>CpxR</b> | 30  | GFR | 60 | 407 | 4  | 0.133333 | 0.133333 |
| <b>SoxS</b> | 21  | GFR | 60 | 407 | 4  | 0.190476 | 0.190476 |
| <b>Fis</b>  | 60  | GFR | 65 | 429 | 17 | 0.283333 | 0.283333 |
| <b>FNR</b>  | 95  | GFR | 65 | 429 | 21 | 0.221053 | 0.221053 |
| <b>H-NS</b> | 61  | GFR | 65 | 429 | 12 | 0.196721 | 0.196721 |
| <b>FruR</b> | 33  | GFR | 65 | 429 | 12 | 0.363636 | 0.363636 |
| <b>Lrp</b>  | 30  | GFR | 65 | 429 | 9  | 0.3      | 0.3      |
| <b>LexA</b> | 29  | GFR | 65 | 429 | 8  | 0.275862 | 0.275862 |
| <b>IHF</b>  | 68  | GFR | 65 | 429 | 12 | 0.176471 | 0.176471 |
| <b>NsrR</b> | 32  | GFR | 65 | 429 | 1  | 0.03125  | 0.03125  |
| <b>CRP</b>  | 183 | GFR | 65 | 429 | 42 | 0.229508 | 0.229508 |
| <b>MarA</b> | 21  | GFR | 65 | 429 | 4  | 0.190476 | 0.190476 |
| <b>PhoP</b> | 29  | GFR | 65 | 429 | 8  | 0.275862 | 0.275862 |
| <b>ArcA</b> | 58  | GFR | 65 | 429 | 13 | 0.224138 | 0.224138 |
| <b>NarL</b> | 29  | GFR | 65 | 429 | 4  | 0.137931 | 0.137931 |
| <b>Fur</b>  | 45  | GFR | 65 | 429 | 22 | 0.488889 | 0.488889 |
| <b>CpxR</b> | 30  | GFR | 65 | 429 | 4  | 0.133333 | 0.133333 |
| <b>SoxS</b> | 21  | GFR | 65 | 429 | 4  | 0.190476 | 0.190476 |
| <b>Fis</b>  | 60  | GFR | 70 | 452 | 19 | 0.316667 | 0.316667 |
| <b>FNR</b>  | 95  | GFR | 70 | 452 | 23 | 0.242105 | 0.242105 |
| <b>H-NS</b> | 61  | GFR | 70 | 452 | 13 | 0.213115 | 0.213115 |

|             |     |     |    |     |    |          |          |
|-------------|-----|-----|----|-----|----|----------|----------|
| <b>FruR</b> | 33  | GFR | 70 | 452 | 12 | 0.363636 | 0.363636 |
| <b>Lrp</b>  | 30  | GFR | 70 | 452 | 9  | 0.3      | 0.3      |
| <b>LexA</b> | 29  | GFR | 70 | 452 | 8  | 0.275862 | 0.275862 |
| <b>IHF</b>  | 68  | GFR | 70 | 452 | 13 | 0.191176 | 0.191176 |
| <b>NsrR</b> | 32  | GFR | 70 | 452 | 1  | 0.03125  | 0.03125  |
| <b>CRP</b>  | 183 | GFR | 70 | 452 | 44 | 0.240437 | 0.240437 |
| <b>MarA</b> | 21  | GFR | 70 | 452 | 4  | 0.190476 | 0.190476 |
| <b>PhoP</b> | 29  | GFR | 70 | 452 | 9  | 0.310345 | 0.310345 |
| <b>ArcA</b> | 58  | GFR | 70 | 452 | 14 | 0.241379 | 0.241379 |
| <b>NarL</b> | 29  | GFR | 70 | 452 | 5  | 0.172414 | 0.172414 |
| <b>Fur</b>  | 45  | GFR | 70 | 452 | 22 | 0.488889 | 0.488889 |
| <b>CpxR</b> | 30  | GFR | 70 | 452 | 4  | 0.133333 | 0.133333 |
| <b>SoxS</b> | 21  | GFR | 70 | 452 | 4  | 0.190476 | 0.190476 |
| <b>Fis</b>  | 60  | GFR | 75 | 482 | 20 | 0.333333 | 0.333333 |
| <b>FNR</b>  | 95  | GFR | 75 | 482 | 24 | 0.252632 | 0.252632 |
| <b>H-NS</b> | 61  | GFR | 75 | 482 | 14 | 0.229508 | 0.229508 |
| <b>FruR</b> | 33  | GFR | 75 | 482 | 12 | 0.363636 | 0.363636 |
| <b>Lrp</b>  | 30  | GFR | 75 | 482 | 10 | 0.333333 | 0.333333 |
| <b>LexA</b> | 29  | GFR | 75 | 482 | 8  | 0.275862 | 0.275862 |
| <b>IHF</b>  | 68  | GFR | 75 | 482 | 14 | 0.205882 | 0.205882 |
| <b>NsrR</b> | 32  | GFR | 75 | 482 | 3  | 0.09375  | 0.09375  |
| <b>CRP</b>  | 183 | GFR | 75 | 482 | 46 | 0.251366 | 0.251366 |
| <b>MarA</b> | 21  | GFR | 75 | 482 | 4  | 0.190476 | 0.190476 |
| <b>PhoP</b> | 29  | GFR | 75 | 482 | 9  | 0.310345 | 0.310345 |
| <b>ArcA</b> | 58  | GFR | 75 | 482 | 15 | 0.258621 | 0.258621 |
| <b>NarL</b> | 29  | GFR | 75 | 482 | 5  | 0.172414 | 0.172414 |
| <b>Fur</b>  | 45  | GFR | 75 | 482 | 22 | 0.488889 | 0.488889 |
| <b>CpxR</b> | 30  | GFR | 75 | 482 | 6  | 0.2      | 0.2      |
| <b>SoxS</b> | 21  | GFR | 75 | 482 | 4  | 0.190476 | 0.190476 |
| <b>Fis</b>  | 60  | GFR | 80 | 505 | 20 | 0.333333 | 0.333333 |
| <b>FNR</b>  | 95  | GFR | 80 | 505 | 26 | 0.273684 | 0.273684 |
| <b>H-NS</b> | 61  | GFR | 80 | 505 | 15 | 0.245902 | 0.245902 |
| <b>FruR</b> | 33  | GFR | 80 | 505 | 15 | 0.454545 | 0.454545 |
| <b>Lrp</b>  | 30  | GFR | 80 | 505 | 10 | 0.333333 | 0.333333 |
| <b>LexA</b> | 29  | GFR | 80 | 505 | 8  | 0.275862 | 0.275862 |
| <b>IHF</b>  | 68  | GFR | 80 | 505 | 14 | 0.205882 | 0.205882 |
| <b>NsrR</b> | 32  | GFR | 80 | 505 | 3  | 0.09375  | 0.09375  |
| <b>CRP</b>  | 183 | GFR | 80 | 505 | 52 | 0.284153 | 0.284153 |
| <b>MarA</b> | 21  | GFR | 80 | 505 | 5  | 0.238095 | 0.238095 |
| <b>PhoP</b> | 29  | GFR | 80 | 505 | 9  | 0.310345 | 0.310345 |
| <b>ArcA</b> | 58  | GFR | 80 | 505 | 18 | 0.310345 | 0.310345 |
| <b>NarL</b> | 29  | GFR | 80 | 505 | 5  | 0.172414 | 0.172414 |
| <b>Fur</b>  | 45  | GFR | 80 | 505 | 23 | 0.511111 | 0.511111 |
| <b>CpxR</b> | 30  | GFR | 80 | 505 | 8  | 0.266667 | 0.266667 |
| <b>SoxS</b> | 21  | GFR | 80 | 505 | 5  | 0.238095 | 0.238095 |
| <b>Fis</b>  | 60  | GFR | 85 | 530 | 22 | 0.366667 | 0.366667 |
| <b>FNR</b>  | 95  | GFR | 85 | 530 | 28 | 0.294737 | 0.294737 |

|             |     |     |     |     |    |          |          |
|-------------|-----|-----|-----|-----|----|----------|----------|
| <b>H-NS</b> | 61  | GFR | 85  | 530 | 15 | 0.245902 | 0.245902 |
| <b>FruR</b> | 33  | GFR | 85  | 530 | 16 | 0.484848 | 0.484848 |
| <b>Lrp</b>  | 30  | GFR | 85  | 530 | 10 | 0.333333 | 0.333333 |
| <b>LexA</b> | 29  | GFR | 85  | 530 | 8  | 0.275862 | 0.275862 |
| <b>IHF</b>  | 68  | GFR | 85  | 530 | 14 | 0.205882 | 0.205882 |
| <b>NsrR</b> | 32  | GFR | 85  | 530 | 4  | 0.125    | 0.125    |
| <b>CRP</b>  | 183 | GFR | 85  | 530 | 53 | 0.289617 | 0.289617 |
| <b>MarA</b> | 21  | GFR | 85  | 530 | 6  | 0.285714 | 0.285714 |
| <b>PhoP</b> | 29  | GFR | 85  | 530 | 9  | 0.310345 | 0.310345 |
| <b>ArcA</b> | 58  | GFR | 85  | 530 | 18 | 0.310345 | 0.310345 |
| <b>NarL</b> | 29  | GFR | 85  | 530 | 5  | 0.172414 | 0.172414 |
| <b>Fur</b>  | 45  | GFR | 85  | 530 | 24 | 0.533333 | 0.533333 |
| <b>CpxR</b> | 30  | GFR | 85  | 530 | 10 | 0.333333 | 0.333333 |
| <b>SoxS</b> | 21  | GFR | 85  | 530 | 6  | 0.285714 | 0.285714 |
| <b>Fis</b>  | 60  | GFR | 90  | 553 | 22 | 0.366667 | 0.366667 |
| <b>FNR</b>  | 95  | GFR | 90  | 553 | 28 | 0.294737 | 0.294737 |
| <b>H-NS</b> | 61  | GFR | 90  | 553 | 17 | 0.278689 | 0.278689 |
| <b>FruR</b> | 33  | GFR | 90  | 553 | 18 | 0.545455 | 0.545455 |
| <b>Lrp</b>  | 30  | GFR | 90  | 553 | 10 | 0.333333 | 0.333333 |
| <b>LexA</b> | 29  | GFR | 90  | 553 | 8  | 0.275862 | 0.275862 |
| <b>IHF</b>  | 68  | GFR | 90  | 553 | 14 | 0.205882 | 0.205882 |
| <b>NsrR</b> | 32  | GFR | 90  | 553 | 4  | 0.125    | 0.125    |
| <b>CRP</b>  | 183 | GFR | 90  | 553 | 57 | 0.311475 | 0.311475 |
| <b>MarA</b> | 21  | GFR | 90  | 553 | 6  | 0.285714 | 0.285714 |
| <b>PhoP</b> | 29  | GFR | 90  | 553 | 9  | 0.310345 | 0.310345 |
| <b>ArcA</b> | 58  | GFR | 90  | 553 | 19 | 0.327586 | 0.327586 |
| <b>NarL</b> | 29  | GFR | 90  | 553 | 5  | 0.172414 | 0.172414 |
| <b>Fur</b>  | 45  | GFR | 90  | 553 | 24 | 0.533333 | 0.533333 |
| <b>CpxR</b> | 30  | GFR | 90  | 553 | 10 | 0.333333 | 0.333333 |
| <b>SoxS</b> | 21  | GFR | 90  | 553 | 6  | 0.285714 | 0.285714 |
| <b>Fis</b>  | 60  | GFR | 95  | 574 | 23 | 0.383333 | 0.383333 |
| <b>FNR</b>  | 95  | GFR | 95  | 574 | 28 | 0.294737 | 0.294737 |
| <b>H-NS</b> | 61  | GFR | 95  | 574 | 17 | 0.278689 | 0.278689 |
| <b>FruR</b> | 33  | GFR | 95  | 574 | 19 | 0.575758 | 0.575758 |
| <b>Lrp</b>  | 30  | GFR | 95  | 574 | 10 | 0.333333 | 0.333333 |
| <b>LexA</b> | 29  | GFR | 95  | 574 | 8  | 0.275862 | 0.275862 |
| <b>IHF</b>  | 68  | GFR | 95  | 574 | 16 | 0.235294 | 0.235294 |
| <b>NsrR</b> | 32  | GFR | 95  | 574 | 4  | 0.125    | 0.125    |
| <b>CRP</b>  | 183 | GFR | 95  | 574 | 60 | 0.327869 | 0.327869 |
| <b>MarA</b> | 21  | GFR | 95  | 574 | 6  | 0.285714 | 0.285714 |
| <b>PhoP</b> | 29  | GFR | 95  | 574 | 9  | 0.310345 | 0.310345 |
| <b>ArcA</b> | 58  | GFR | 95  | 574 | 20 | 0.344828 | 0.344828 |
| <b>NarL</b> | 29  | GFR | 95  | 574 | 5  | 0.172414 | 0.172414 |
| <b>Fur</b>  | 45  | GFR | 95  | 574 | 24 | 0.533333 | 0.533333 |
| <b>CpxR</b> | 30  | GFR | 95  | 574 | 10 | 0.333333 | 0.333333 |
| <b>SoxS</b> | 21  | GFR | 95  | 574 | 6  | 0.285714 | 0.285714 |
| <b>Fis</b>  | 60  | GFR | 100 | 590 | 24 | 0.4      | 0.4      |

|             |     |     |     |     |    |          |          |
|-------------|-----|-----|-----|-----|----|----------|----------|
| <b>FNR</b>  | 95  | GFR | 100 | 590 | 30 | 0.315789 | 0.315789 |
| <b>H-NS</b> | 61  | GFR | 100 | 590 | 17 | 0.278689 | 0.278689 |
| <b>FruR</b> | 33  | GFR | 100 | 590 | 19 | 0.575758 | 0.575758 |
| <b>Lrp</b>  | 30  | GFR | 100 | 590 | 10 | 0.333333 | 0.333333 |
| <b>LexA</b> | 29  | GFR | 100 | 590 | 8  | 0.275862 | 0.275862 |
| <b>IHF</b>  | 68  | GFR | 100 | 590 | 17 | 0.25     | 0.25     |
| <b>NsrR</b> | 32  | GFR | 100 | 590 | 5  | 0.15625  | 0.15625  |
| <b>CRP</b>  | 183 | GFR | 100 | 590 | 61 | 0.333333 | 0.333333 |
| <b>MarA</b> | 21  | GFR | 100 | 590 | 7  | 0.333333 | 0.333333 |
| <b>PhoP</b> | 29  | GFR | 100 | 590 | 10 | 0.344828 | 0.344828 |
| <b>ArcA</b> | 58  | GFR | 100 | 590 | 22 | 0.37931  | 0.37931  |
| <b>NarL</b> | 29  | GFR | 100 | 590 | 5  | 0.172414 | 0.172414 |
| <b>Fur</b>  | 45  | GFR | 100 | 590 | 24 | 0.533333 | 0.533333 |
| <b>CpxR</b> | 30  | GFR | 100 | 590 | 10 | 0.333333 | 0.333333 |
| <b>SoxS</b> | 21  | GFR | 100 | 590 | 7  | 0.333333 | 0.333333 |
| <b>Fis</b>  | 60  | PCS | 5   | 22  | 1  | 0.016667 | 0.045455 |
| <b>FNR</b>  | 95  | PCS | 5   | 22  | 1  | 0.010526 | 0.045455 |
| <b>H-NS</b> | 61  | PCS | 5   | 22  | 0  | 0        | 0        |
| <b>FruR</b> | 33  | PCS | 5   | 22  | 0  | 0        | 0        |
| <b>Lrp</b>  | 30  | PCS | 5   | 22  | 0  | 0        | 0        |
| <b>LexA</b> | 29  | PCS | 5   | 22  | 1  | 0.034483 | 0.045455 |
| <b>IHF</b>  | 68  | PCS | 5   | 22  | 1  | 0.014706 | 0.045455 |
| <b>NsrR</b> | 32  | PCS | 5   | 22  | 1  | 0.03125  | 0.045455 |
| <b>CRP</b>  | 183 | PCS | 5   | 22  | 0  | 0        | 0        |
| <b>MarA</b> | 21  | PCS | 5   | 22  | 0  | 0        | 0        |
| <b>PhoP</b> | 29  | PCS | 5   | 22  | 0  | 0        | 0        |
| <b>ArcA</b> | 58  | PCS | 5   | 22  | 0  | 0        | 0        |
| <b>NarL</b> | 29  | PCS | 5   | 22  | 0  | 0        | 0        |
| <b>Fur</b>  | 45  | PCS | 5   | 22  | 0  | 0        | 0        |
| <b>CpxR</b> | 30  | PCS | 5   | 22  | 1  | 0.033333 | 0.045455 |
| <b>SoxS</b> | 21  | PCS | 5   | 22  | 0  | 0        | 0        |
| <b>Fis</b>  | 60  | PCS | 10  | 42  | 2  | 0.033333 | 0.047619 |
| <b>FNR</b>  | 95  | PCS | 10  | 42  | 1  | 0.010526 | 0.02381  |
| <b>H-NS</b> | 61  | PCS | 10  | 42  | 0  | 0        | 0        |
| <b>FruR</b> | 33  | PCS | 10  | 42  | 0  | 0        | 0        |
| <b>Lrp</b>  | 30  | PCS | 10  | 42  | 0  | 0        | 0        |
| <b>LexA</b> | 29  | PCS | 10  | 42  | 2  | 0.068966 | 0.068966 |
| <b>IHF</b>  | 68  | PCS | 10  | 42  | 2  | 0.029412 | 0.047619 |
| <b>NsrR</b> | 32  | PCS | 10  | 42  | 1  | 0.03125  | 0.03125  |
| <b>CRP</b>  | 183 | PCS | 10  | 42  | 2  | 0.010929 | 0.047619 |
| <b>MarA</b> | 21  | PCS | 10  | 42  | 0  | 0        | 0        |
| <b>PhoP</b> | 29  | PCS | 10  | 42  | 0  | 0        | 0        |
| <b>ArcA</b> | 58  | PCS | 10  | 42  | 0  | 0        | 0        |
| <b>NarL</b> | 29  | PCS | 10  | 42  | 0  | 0        | 0        |
| <b>Fur</b>  | 45  | PCS | 10  | 42  | 0  | 0        | 0        |
| <b>CpxR</b> | 30  | PCS | 10  | 42  | 1  | 0.033333 | 0.033333 |
| <b>SoxS</b> | 21  | PCS | 10  | 42  | 0  | 0        | 0        |

|             |     |     |    |     |   |          |          |
|-------------|-----|-----|----|-----|---|----------|----------|
| <b>Fis</b>  | 60  | PCS | 15 | 62  | 2 | 0.033333 | 0.033333 |
| <b>FNR</b>  | 95  | PCS | 15 | 62  | 1 | 0.010526 | 0.016129 |
| <b>H-NS</b> | 61  | PCS | 15 | 62  | 1 | 0.016393 | 0.016393 |
| <b>FruR</b> | 33  | PCS | 15 | 62  | 0 | 0        | 0        |
| <b>Lrp</b>  | 30  | PCS | 15 | 62  | 0 | 0        | 0        |
| <b>LexA</b> | 29  | PCS | 15 | 62  | 2 | 0.068966 | 0.068966 |
| <b>IHF</b>  | 68  | PCS | 15 | 62  | 3 | 0.044118 | 0.048387 |
| <b>NsrR</b> | 32  | PCS | 15 | 62  | 1 | 0.03125  | 0.03125  |
| <b>CRP</b>  | 183 | PCS | 15 | 62  | 4 | 0.021858 | 0.064516 |
| <b>MarA</b> | 21  | PCS | 15 | 62  | 0 | 0        | 0        |
| <b>PhoP</b> | 29  | PCS | 15 | 62  | 2 | 0.068966 | 0.068966 |
| <b>ArcA</b> | 58  | PCS | 15 | 62  | 1 | 0.017241 | 0.017241 |
| <b>NarL</b> | 29  | PCS | 15 | 62  | 0 | 0        | 0        |
| <b>Fur</b>  | 45  | PCS | 15 | 62  | 1 | 0.022222 | 0.022222 |
| <b>CpxR</b> | 30  | PCS | 15 | 62  | 1 | 0.033333 | 0.033333 |
| <b>SoxS</b> | 21  | PCS | 15 | 62  | 0 | 0        | 0        |
| <b>Fis</b>  | 60  | PCS | 20 | 82  | 2 | 0.033333 | 0.033333 |
| <b>FNR</b>  | 95  | PCS | 20 | 82  | 1 | 0.010526 | 0.012195 |
| <b>H-NS</b> | 61  | PCS | 20 | 82  | 1 | 0.016393 | 0.016393 |
| <b>FruR</b> | 33  | PCS | 20 | 82  | 0 | 0        | 0        |
| <b>Lrp</b>  | 30  | PCS | 20 | 82  | 0 | 0        | 0        |
| <b>LexA</b> | 29  | PCS | 20 | 82  | 2 | 0.068966 | 0.068966 |
| <b>IHF</b>  | 68  | PCS | 20 | 82  | 3 | 0.044118 | 0.044118 |
| <b>NsrR</b> | 32  | PCS | 20 | 82  | 2 | 0.0625   | 0.0625   |
| <b>CRP</b>  | 183 | PCS | 20 | 82  | 4 | 0.021858 | 0.04878  |
| <b>MarA</b> | 21  | PCS | 20 | 82  | 1 | 0.047619 | 0.047619 |
| <b>PhoP</b> | 29  | PCS | 20 | 82  | 2 | 0.068966 | 0.068966 |
| <b>ArcA</b> | 58  | PCS | 20 | 82  | 1 | 0.017241 | 0.017241 |
| <b>NarL</b> | 29  | PCS | 20 | 82  | 0 | 0        | 0        |
| <b>Fur</b>  | 45  | PCS | 20 | 82  | 1 | 0.022222 | 0.022222 |
| <b>CpxR</b> | 30  | PCS | 20 | 82  | 1 | 0.033333 | 0.033333 |
| <b>SoxS</b> | 21  | PCS | 20 | 82  | 0 | 0        | 0        |
| <b>Fis</b>  | 60  | PCS | 25 | 104 | 3 | 0.05     | 0.05     |
| <b>FNR</b>  | 95  | PCS | 25 | 104 | 1 | 0.010526 | 0.010526 |
| <b>H-NS</b> | 61  | PCS | 25 | 104 | 1 | 0.016393 | 0.016393 |
| <b>FruR</b> | 33  | PCS | 25 | 104 | 0 | 0        | 0        |
| <b>Lrp</b>  | 30  | PCS | 25 | 104 | 0 | 0        | 0        |
| <b>LexA</b> | 29  | PCS | 25 | 104 | 2 | 0.068966 | 0.068966 |
| <b>IHF</b>  | 68  | PCS | 25 | 104 | 4 | 0.058824 | 0.058824 |
| <b>NsrR</b> | 32  | PCS | 25 | 104 | 2 | 0.0625   | 0.0625   |
| <b>CRP</b>  | 183 | PCS | 25 | 104 | 4 | 0.021858 | 0.038462 |
| <b>MarA</b> | 21  | PCS | 25 | 104 | 1 | 0.047619 | 0.047619 |
| <b>PhoP</b> | 29  | PCS | 25 | 104 | 3 | 0.103448 | 0.103448 |
| <b>ArcA</b> | 58  | PCS | 25 | 104 | 1 | 0.017241 | 0.017241 |
| <b>NarL</b> | 29  | PCS | 25 | 104 | 0 | 0        | 0        |
| <b>Fur</b>  | 45  | PCS | 25 | 104 | 1 | 0.022222 | 0.022222 |
| <b>CpxR</b> | 30  | PCS | 25 | 104 | 1 | 0.033333 | 0.033333 |



|             |     |     |    |     |    |          |          |
|-------------|-----|-----|----|-----|----|----------|----------|
| <b>SoxS</b> | 21  | PCS | 25 | 104 | 0  | 0        | 0        |
| <b>Fis</b>  | 60  | PCS | 30 | 123 | 4  | 0.066667 | 0.066667 |
| <b>FNR</b>  | 95  | PCS | 30 | 123 | 3  | 0.031579 | 0.031579 |
| <b>H-NS</b> | 61  | PCS | 30 | 123 | 2  | 0.032787 | 0.032787 |
| <b>FruR</b> | 33  | PCS | 30 | 123 | 1  | 0.030303 | 0.030303 |
| <b>Lrp</b>  | 30  | PCS | 30 | 123 | 0  | 0        | 0        |
| <b>LexA</b> | 29  | PCS | 30 | 123 | 2  | 0.068966 | 0.068966 |
| <b>IHF</b>  | 68  | PCS | 30 | 123 | 6  | 0.088235 | 0.088235 |
| <b>NsrR</b> | 32  | PCS | 30 | 123 | 2  | 0.0625   | 0.0625   |
| <b>CRP</b>  | 183 | PCS | 30 | 123 | 5  | 0.027322 | 0.04065  |
| <b>MarA</b> | 21  | PCS | 30 | 123 | 1  | 0.047619 | 0.047619 |
| <b>PhoP</b> | 29  | PCS | 30 | 123 | 3  | 0.103448 | 0.103448 |
| <b>ArcA</b> | 58  | PCS | 30 | 123 | 3  | 0.051724 | 0.051724 |
| <b>NarL</b> | 29  | PCS | 30 | 123 | 1  | 0.034483 | 0.034483 |
| <b>Fur</b>  | 45  | PCS | 30 | 123 | 1  | 0.022222 | 0.022222 |
| <b>CpxR</b> | 30  | PCS | 30 | 123 | 1  | 0.033333 | 0.033333 |
| <b>SoxS</b> | 21  | PCS | 30 | 123 | 0  | 0        | 0        |
| <b>Fis</b>  | 60  | PCS | 35 | 144 | 7  | 0.116667 | 0.116667 |
| <b>FNR</b>  | 95  | PCS | 35 | 144 | 4  | 0.042105 | 0.042105 |
| <b>H-NS</b> | 61  | PCS | 35 | 144 | 2  | 0.032787 | 0.032787 |
| <b>FruR</b> | 33  | PCS | 35 | 144 | 1  | 0.030303 | 0.030303 |
| <b>Lrp</b>  | 30  | PCS | 35 | 144 | 0  | 0        | 0        |
| <b>LexA</b> | 29  | PCS | 35 | 144 | 2  | 0.068966 | 0.068966 |
| <b>IHF</b>  | 68  | PCS | 35 | 144 | 8  | 0.117647 | 0.117647 |
| <b>NsrR</b> | 32  | PCS | 35 | 144 | 3  | 0.09375  | 0.09375  |
| <b>CRP</b>  | 183 | PCS | 35 | 144 | 8  | 0.043716 | 0.055556 |
| <b>MarA</b> | 21  | PCS | 35 | 144 | 1  | 0.047619 | 0.047619 |
| <b>PhoP</b> | 29  | PCS | 35 | 144 | 3  | 0.103448 | 0.103448 |
| <b>ArcA</b> | 58  | PCS | 35 | 144 | 4  | 0.068966 | 0.068966 |
| <b>NarL</b> | 29  | PCS | 35 | 144 | 1  | 0.034483 | 0.034483 |
| <b>Fur</b>  | 45  | PCS | 35 | 144 | 1  | 0.022222 | 0.022222 |
| <b>CpxR</b> | 30  | PCS | 35 | 144 | 1  | 0.033333 | 0.033333 |
| <b>SoxS</b> | 21  | PCS | 35 | 144 | 0  | 0        | 0        |
| <b>Fis</b>  | 60  | PCS | 40 | 164 | 8  | 0.133333 | 0.133333 |
| <b>FNR</b>  | 95  | PCS | 40 | 164 | 5  | 0.052632 | 0.052632 |
| <b>H-NS</b> | 61  | PCS | 40 | 164 | 2  | 0.032787 | 0.032787 |
| <b>FruR</b> | 33  | PCS | 40 | 164 | 3  | 0.090909 | 0.090909 |
| <b>Lrp</b>  | 30  | PCS | 40 | 164 | 0  | 0        | 0        |
| <b>LexA</b> | 29  | PCS | 40 | 164 | 2  | 0.068966 | 0.068966 |
| <b>IHF</b>  | 68  | PCS | 40 | 164 | 9  | 0.132353 | 0.132353 |
| <b>NsrR</b> | 32  | PCS | 40 | 164 | 3  | 0.09375  | 0.09375  |
| <b>CRP</b>  | 183 | PCS | 40 | 164 | 12 | 0.065574 | 0.073171 |
| <b>MarA</b> | 21  | PCS | 40 | 164 | 1  | 0.047619 | 0.047619 |
| <b>PhoP</b> | 29  | PCS | 40 | 164 | 3  | 0.103448 | 0.103448 |
| <b>ArcA</b> | 58  | PCS | 40 | 164 | 5  | 0.086207 | 0.086207 |
| <b>NarL</b> | 29  | PCS | 40 | 164 | 2  | 0.068966 | 0.068966 |
| <b>Fur</b>  | 45  | PCS | 40 | 164 | 1  | 0.022222 | 0.022222 |

|             |     |     |    |     |    |          |          |
|-------------|-----|-----|----|-----|----|----------|----------|
| <b>CpxR</b> | 30  | PCS | 40 | 164 | 1  | 0.033333 | 0.033333 |
| <b>SoxS</b> | 21  | PCS | 40 | 164 | 0  | 0        | 0        |
| <b>Fis</b>  | 60  | PCS | 45 | 185 | 8  | 0.133333 | 0.133333 |
| <b>FNR</b>  | 95  | PCS | 45 | 185 | 6  | 0.063158 | 0.063158 |
| <b>H-NS</b> | 61  | PCS | 45 | 185 | 2  | 0.032787 | 0.032787 |
| <b>FruR</b> | 33  | PCS | 45 | 185 | 4  | 0.121212 | 0.121212 |
| <b>Lrp</b>  | 30  | PCS | 45 | 185 | 0  | 0        | 0        |
| <b>LexA</b> | 29  | PCS | 45 | 185 | 2  | 0.068966 | 0.068966 |
| <b>IHF</b>  | 68  | PCS | 45 | 185 | 12 | 0.176471 | 0.176471 |
| <b>NsrR</b> | 32  | PCS | 45 | 185 | 3  | 0.09375  | 0.09375  |
| <b>CRP</b>  | 183 | PCS | 45 | 185 | 13 | 0.071038 | 0.071038 |
| <b>MarA</b> | 21  | PCS | 45 | 185 | 1  | 0.047619 | 0.047619 |
| <b>PhoP</b> | 29  | PCS | 45 | 185 | 3  | 0.103448 | 0.103448 |
| <b>ArcA</b> | 58  | PCS | 45 | 185 | 6  | 0.103448 | 0.103448 |
| <b>NarL</b> | 29  | PCS | 45 | 185 | 2  | 0.068966 | 0.068966 |
| <b>Fur</b>  | 45  | PCS | 45 | 185 | 1  | 0.022222 | 0.022222 |
| <b>CpxR</b> | 30  | PCS | 45 | 185 | 1  | 0.033333 | 0.033333 |
| <b>SoxS</b> | 21  | PCS | 45 | 185 | 0  | 0        | 0        |
| <b>Fis</b>  | 60  | PCS | 50 | 205 | 9  | 0.15     | 0.15     |
| <b>FNR</b>  | 95  | PCS | 50 | 205 | 6  | 0.063158 | 0.063158 |
| <b>H-NS</b> | 61  | PCS | 50 | 205 | 4  | 0.065574 | 0.065574 |
| <b>FruR</b> | 33  | PCS | 50 | 205 | 4  | 0.121212 | 0.121212 |
| <b>Lrp</b>  | 30  | PCS | 50 | 205 | 1  | 0.033333 | 0.033333 |
| <b>LexA</b> | 29  | PCS | 50 | 205 | 2  | 0.068966 | 0.068966 |
| <b>IHF</b>  | 68  | PCS | 50 | 205 | 12 | 0.176471 | 0.176471 |
| <b>NsrR</b> | 32  | PCS | 50 | 205 | 3  | 0.09375  | 0.09375  |
| <b>CRP</b>  | 183 | PCS | 50 | 205 | 16 | 0.087432 | 0.087432 |
| <b>MarA</b> | 21  | PCS | 50 | 205 | 1  | 0.047619 | 0.047619 |
| <b>PhoP</b> | 29  | PCS | 50 | 205 | 4  | 0.137931 | 0.137931 |
| <b>ArcA</b> | 58  | PCS | 50 | 205 | 6  | 0.103448 | 0.103448 |
| <b>NarL</b> | 29  | PCS | 50 | 205 | 2  | 0.068966 | 0.068966 |
| <b>Fur</b>  | 45  | PCS | 50 | 205 | 2  | 0.044444 | 0.044444 |
| <b>CpxR</b> | 30  | PCS | 50 | 205 | 2  | 0.066667 | 0.066667 |
| <b>SoxS</b> | 21  | PCS | 50 | 205 | 0  | 0        | 0        |
| <b>Fis</b>  | 60  | PCS | 55 | 226 | 11 | 0.183333 | 0.183333 |
| <b>FNR</b>  | 95  | PCS | 55 | 226 | 6  | 0.063158 | 0.063158 |
| <b>H-NS</b> | 61  | PCS | 55 | 226 | 4  | 0.065574 | 0.065574 |
| <b>FruR</b> | 33  | PCS | 55 | 226 | 4  | 0.121212 | 0.121212 |
| <b>Lrp</b>  | 30  | PCS | 55 | 226 | 1  | 0.033333 | 0.033333 |
| <b>LexA</b> | 29  | PCS | 55 | 226 | 2  | 0.068966 | 0.068966 |
| <b>IHF</b>  | 68  | PCS | 55 | 226 | 12 | 0.176471 | 0.176471 |
| <b>NsrR</b> | 32  | PCS | 55 | 226 | 4  | 0.125    | 0.125    |
| <b>CRP</b>  | 183 | PCS | 55 | 226 | 19 | 0.103825 | 0.103825 |
| <b>MarA</b> | 21  | PCS | 55 | 226 | 1  | 0.047619 | 0.047619 |
| <b>PhoP</b> | 29  | PCS | 55 | 226 | 4  | 0.137931 | 0.137931 |
| <b>ArcA</b> | 58  | PCS | 55 | 226 | 6  | 0.103448 | 0.103448 |
| <b>NarL</b> | 29  | PCS | 55 | 226 | 2  | 0.068966 | 0.068966 |

|             |     |     |    |     |    |          |          |
|-------------|-----|-----|----|-----|----|----------|----------|
| <b>Fur</b>  | 45  | PCS | 55 | 226 | 2  | 0.044444 | 0.044444 |
| <b>CpxR</b> | 30  | PCS | 55 | 226 | 2  | 0.066667 | 0.066667 |
| <b>SoxS</b> | 21  | PCS | 55 | 226 | 0  | 0        | 0        |
| <b>Fis</b>  | 60  | PCS | 60 | 246 | 11 | 0.183333 | 0.183333 |
| <b>FNR</b>  | 95  | PCS | 60 | 246 | 6  | 0.063158 | 0.063158 |
| <b>H-NS</b> | 61  | PCS | 60 | 246 | 4  | 0.065574 | 0.065574 |
| <b>FruR</b> | 33  | PCS | 60 | 246 | 5  | 0.151515 | 0.151515 |
| <b>Lrp</b>  | 30  | PCS | 60 | 246 | 1  | 0.033333 | 0.033333 |
| <b>LexA</b> | 29  | PCS | 60 | 246 | 4  | 0.137931 | 0.137931 |
| <b>IHF</b>  | 68  | PCS | 60 | 246 | 12 | 0.176471 | 0.176471 |
| <b>NsrR</b> | 32  | PCS | 60 | 246 | 4  | 0.125    | 0.125    |
| <b>CRP</b>  | 183 | PCS | 60 | 246 | 20 | 0.10929  | 0.10929  |
| <b>MarA</b> | 21  | PCS | 60 | 246 | 1  | 0.047619 | 0.047619 |
| <b>PhoP</b> | 29  | PCS | 60 | 246 | 4  | 0.137931 | 0.137931 |
| <b>ArcA</b> | 58  | PCS | 60 | 246 | 6  | 0.103448 | 0.103448 |
| <b>NarL</b> | 29  | PCS | 60 | 246 | 2  | 0.068966 | 0.068966 |
| <b>Fur</b>  | 45  | PCS | 60 | 246 | 2  | 0.044444 | 0.044444 |
| <b>CpxR</b> | 30  | PCS | 60 | 246 | 3  | 0.1      | 0.1      |
| <b>SoxS</b> | 21  | PCS | 60 | 246 | 0  | 0        | 0        |
| <b>Fis</b>  | 60  | PCS | 65 | 265 | 11 | 0.183333 | 0.183333 |
| <b>FNR</b>  | 95  | PCS | 65 | 265 | 6  | 0.063158 | 0.063158 |
| <b>H-NS</b> | 61  | PCS | 65 | 265 | 4  | 0.065574 | 0.065574 |
| <b>FruR</b> | 33  | PCS | 65 | 265 | 5  | 0.151515 | 0.151515 |
| <b>Lrp</b>  | 30  | PCS | 65 | 265 | 1  | 0.033333 | 0.033333 |
| <b>LexA</b> | 29  | PCS | 65 | 265 | 4  | 0.137931 | 0.137931 |
| <b>IHF</b>  | 68  | PCS | 65 | 265 | 12 | 0.176471 | 0.176471 |
| <b>NsrR</b> | 32  | PCS | 65 | 265 | 4  | 0.125    | 0.125    |
| <b>CRP</b>  | 183 | PCS | 65 | 265 | 21 | 0.114754 | 0.114754 |
| <b>MarA</b> | 21  | PCS | 65 | 265 | 1  | 0.047619 | 0.047619 |
| <b>PhoP</b> | 29  | PCS | 65 | 265 | 4  | 0.137931 | 0.137931 |
| <b>ArcA</b> | 58  | PCS | 65 | 265 | 6  | 0.103448 | 0.103448 |
| <b>NarL</b> | 29  | PCS | 65 | 265 | 2  | 0.068966 | 0.068966 |
| <b>Fur</b>  | 45  | PCS | 65 | 265 | 4  | 0.088889 | 0.088889 |
| <b>CpxR</b> | 30  | PCS | 65 | 265 | 3  | 0.1      | 0.1      |
| <b>SoxS</b> | 21  | PCS | 65 | 265 | 0  | 0        | 0        |
| <b>Fis</b>  | 60  | PCS | 70 | 283 | 12 | 0.2      | 0.2      |
| <b>FNR</b>  | 95  | PCS | 70 | 283 | 6  | 0.063158 | 0.063158 |
| <b>H-NS</b> | 61  | PCS | 70 | 283 | 4  | 0.065574 | 0.065574 |
| <b>FruR</b> | 33  | PCS | 70 | 283 | 6  | 0.181818 | 0.181818 |
| <b>Lrp</b>  | 30  | PCS | 70 | 283 | 1  | 0.033333 | 0.033333 |
| <b>LexA</b> | 29  | PCS | 70 | 283 | 4  | 0.137931 | 0.137931 |
| <b>IHF</b>  | 68  | PCS | 70 | 283 | 12 | 0.176471 | 0.176471 |
| <b>NsrR</b> | 32  | PCS | 70 | 283 | 4  | 0.125    | 0.125    |
| <b>CRP</b>  | 183 | PCS | 70 | 283 | 23 | 0.125683 | 0.125683 |
| <b>MarA</b> | 21  | PCS | 70 | 283 | 2  | 0.095238 | 0.095238 |
| <b>PhoP</b> | 29  | PCS | 70 | 283 | 5  | 0.172414 | 0.172414 |
| <b>ArcA</b> | 58  | PCS | 70 | 283 | 7  | 0.12069  | 0.12069  |

|             |     |     |    |     |    |          |          |
|-------------|-----|-----|----|-----|----|----------|----------|
| <b>NarL</b> | 29  | PCS | 70 | 283 | 2  | 0.068966 | 0.068966 |
| <b>Fur</b>  | 45  | PCS | 70 | 283 | 4  | 0.088889 | 0.088889 |
| <b>CpxR</b> | 30  | PCS | 70 | 283 | 4  | 0.133333 | 0.133333 |
| <b>SoxS</b> | 21  | PCS | 70 | 283 | 1  | 0.047619 | 0.047619 |
| <b>Fis</b>  | 60  | PCS | 75 | 305 | 15 | 0.25     | 0.25     |
| <b>FNR</b>  | 95  | PCS | 75 | 305 | 7  | 0.073684 | 0.073684 |
| <b>H-NS</b> | 61  | PCS | 75 | 305 | 4  | 0.065574 | 0.065574 |
| <b>FruR</b> | 33  | PCS | 75 | 305 | 6  | 0.181818 | 0.181818 |
| <b>Lrp</b>  | 30  | PCS | 75 | 305 | 1  | 0.033333 | 0.033333 |
| <b>LexA</b> | 29  | PCS | 75 | 305 | 4  | 0.137931 | 0.137931 |
| <b>IHF</b>  | 68  | PCS | 75 | 305 | 14 | 0.205882 | 0.205882 |
| <b>NsrR</b> | 32  | PCS | 75 | 305 | 4  | 0.125    | 0.125    |
| <b>CRP</b>  | 183 | PCS | 75 | 305 | 26 | 0.142077 | 0.142077 |
| <b>MarA</b> | 21  | PCS | 75 | 305 | 2  | 0.095238 | 0.095238 |
| <b>PhoP</b> | 29  | PCS | 75 | 305 | 5  | 0.172414 | 0.172414 |
| <b>ArcA</b> | 58  | PCS | 75 | 305 | 7  | 0.12069  | 0.12069  |
| <b>NarL</b> | 29  | PCS | 75 | 305 | 2  | 0.068966 | 0.068966 |
| <b>Fur</b>  | 45  | PCS | 75 | 305 | 5  | 0.111111 | 0.111111 |
| <b>CpxR</b> | 30  | PCS | 75 | 305 | 4  | 0.133333 | 0.133333 |
| <b>SoxS</b> | 21  | PCS | 75 | 305 | 1  | 0.047619 | 0.047619 |
| <b>Fis</b>  | 60  | PCS | 80 | 328 | 17 | 0.283333 | 0.283333 |
| <b>FNR</b>  | 95  | PCS | 80 | 328 | 8  | 0.084211 | 0.084211 |
| <b>H-NS</b> | 61  | PCS | 80 | 328 | 4  | 0.065574 | 0.065574 |
| <b>FruR</b> | 33  | PCS | 80 | 328 | 7  | 0.212121 | 0.212121 |
| <b>Lrp</b>  | 30  | PCS | 80 | 328 | 1  | 0.033333 | 0.033333 |
| <b>LexA</b> | 29  | PCS | 80 | 328 | 4  | 0.137931 | 0.137931 |
| <b>IHF</b>  | 68  | PCS | 80 | 328 | 15 | 0.220588 | 0.220588 |
| <b>NsrR</b> | 32  | PCS | 80 | 328 | 4  | 0.125    | 0.125    |
| <b>CRP</b>  | 183 | PCS | 80 | 328 | 29 | 0.15847  | 0.15847  |
| <b>MarA</b> | 21  | PCS | 80 | 328 | 2  | 0.095238 | 0.095238 |
| <b>PhoP</b> | 29  | PCS | 80 | 328 | 5  | 0.172414 | 0.172414 |
| <b>ArcA</b> | 58  | PCS | 80 | 328 | 8  | 0.137931 | 0.137931 |
| <b>NarL</b> | 29  | PCS | 80 | 328 | 2  | 0.068966 | 0.068966 |
| <b>Fur</b>  | 45  | PCS | 80 | 328 | 8  | 0.177778 | 0.177778 |
| <b>CpxR</b> | 30  | PCS | 80 | 328 | 5  | 0.166667 | 0.166667 |
| <b>SoxS</b> | 21  | PCS | 80 | 328 | 1  | 0.047619 | 0.047619 |
| <b>Fis</b>  | 60  | PCS | 85 | 350 | 17 | 0.283333 | 0.283333 |
| <b>FNR</b>  | 95  | PCS | 85 | 350 | 8  | 0.084211 | 0.084211 |
| <b>H-NS</b> | 61  | PCS | 85 | 350 | 4  | 0.065574 | 0.065574 |
| <b>FruR</b> | 33  | PCS | 85 | 350 | 7  | 0.212121 | 0.212121 |
| <b>Lrp</b>  | 30  | PCS | 85 | 350 | 1  | 0.033333 | 0.033333 |
| <b>LexA</b> | 29  | PCS | 85 | 350 | 4  | 0.137931 | 0.137931 |
| <b>IHF</b>  | 68  | PCS | 85 | 350 | 15 | 0.220588 | 0.220588 |
| <b>NsrR</b> | 32  | PCS | 85 | 350 | 4  | 0.125    | 0.125    |
| <b>CRP</b>  | 183 | PCS | 85 | 350 | 30 | 0.163934 | 0.163934 |
| <b>MarA</b> | 21  | PCS | 85 | 350 | 2  | 0.095238 | 0.095238 |
| <b>PhoP</b> | 29  | PCS | 85 | 350 | 5  | 0.172414 | 0.172414 |

|             |     |     |     |     |    |          |          |
|-------------|-----|-----|-----|-----|----|----------|----------|
| <b>ArcA</b> | 58  | PCS | 85  | 350 | 8  | 0.137931 | 0.137931 |
| <b>NarL</b> | 29  | PCS | 85  | 350 | 2  | 0.068966 | 0.068966 |
| <b>Fur</b>  | 45  | PCS | 85  | 350 | 9  | 0.2      | 0.2      |
| <b>CpxR</b> | 30  | PCS | 85  | 350 | 5  | 0.166667 | 0.166667 |
| <b>SoxS</b> | 21  | PCS | 85  | 350 | 1  | 0.047619 | 0.047619 |
| <b>Fis</b>  | 60  | PCS | 90  | 370 | 18 | 0.3      | 0.3      |
| <b>FNR</b>  | 95  | PCS | 90  | 370 | 9  | 0.094737 | 0.094737 |
| <b>H-NS</b> | 61  | PCS | 90  | 370 | 4  | 0.065574 | 0.065574 |
| <b>FruR</b> | 33  | PCS | 90  | 370 | 7  | 0.212121 | 0.212121 |
| <b>Lrp</b>  | 30  | PCS | 90  | 370 | 2  | 0.066667 | 0.066667 |
| <b>LexA</b> | 29  | PCS | 90  | 370 | 5  | 0.172414 | 0.172414 |
| <b>IHF</b>  | 68  | PCS | 90  | 370 | 16 | 0.235294 | 0.235294 |
| <b>NsrR</b> | 32  | PCS | 90  | 370 | 4  | 0.125    | 0.125    |
| <b>CRP</b>  | 183 | PCS | 90  | 370 | 31 | 0.169399 | 0.169399 |
| <b>MarA</b> | 21  | PCS | 90  | 370 | 2  | 0.095238 | 0.095238 |
| <b>PhoP</b> | 29  | PCS | 90  | 370 | 5  | 0.172414 | 0.172414 |
| <b>ArcA</b> | 58  | PCS | 90  | 370 | 9  | 0.155172 | 0.155172 |
| <b>NarL</b> | 29  | PCS | 90  | 370 | 3  | 0.103448 | 0.103448 |
| <b>Fur</b>  | 45  | PCS | 90  | 370 | 10 | 0.222222 | 0.222222 |
| <b>CpxR</b> | 30  | PCS | 90  | 370 | 6  | 0.2      | 0.2      |
| <b>SoxS</b> | 21  | PCS | 90  | 370 | 1  | 0.047619 | 0.047619 |
| <b>Fis</b>  | 60  | PCS | 95  | 389 | 18 | 0.3      | 0.3      |
| <b>FNR</b>  | 95  | PCS | 95  | 389 | 10 | 0.105263 | 0.105263 |
| <b>H-NS</b> | 61  | PCS | 95  | 389 | 6  | 0.098361 | 0.098361 |
| <b>FruR</b> | 33  | PCS | 95  | 389 | 8  | 0.242424 | 0.242424 |
| <b>Lrp</b>  | 30  | PCS | 95  | 389 | 2  | 0.066667 | 0.066667 |
| <b>LexA</b> | 29  | PCS | 95  | 389 | 5  | 0.172414 | 0.172414 |
| <b>IHF</b>  | 68  | PCS | 95  | 389 | 16 | 0.235294 | 0.235294 |
| <b>NsrR</b> | 32  | PCS | 95  | 389 | 4  | 0.125    | 0.125    |
| <b>CRP</b>  | 183 | PCS | 95  | 389 | 33 | 0.180328 | 0.180328 |
| <b>MarA</b> | 21  | PCS | 95  | 389 | 2  | 0.095238 | 0.095238 |
| <b>PhoP</b> | 29  | PCS | 95  | 389 | 5  | 0.172414 | 0.172414 |
| <b>ArcA</b> | 58  | PCS | 95  | 389 | 9  | 0.155172 | 0.155172 |
| <b>NarL</b> | 29  | PCS | 95  | 389 | 3  | 0.103448 | 0.103448 |
| <b>Fur</b>  | 45  | PCS | 95  | 389 | 11 | 0.244444 | 0.244444 |
| <b>CpxR</b> | 30  | PCS | 95  | 389 | 6  | 0.2      | 0.2      |
| <b>SoxS</b> | 21  | PCS | 95  | 389 | 1  | 0.047619 | 0.047619 |
| <b>Fis</b>  | 60  | PCS | 100 | 408 | 18 | 0.3      | 0.3      |
| <b>FNR</b>  | 95  | PCS | 100 | 408 | 12 | 0.126316 | 0.126316 |
| <b>H-NS</b> | 61  | PCS | 100 | 408 | 7  | 0.114754 | 0.114754 |
| <b>FruR</b> | 33  | PCS | 100 | 408 | 8  | 0.242424 | 0.242424 |
| <b>Lrp</b>  | 30  | PCS | 100 | 408 | 3  | 0.1      | 0.1      |
| <b>LexA</b> | 29  | PCS | 100 | 408 | 5  | 0.172414 | 0.172414 |
| <b>IHF</b>  | 68  | PCS | 100 | 408 | 16 | 0.235294 | 0.235294 |
| <b>NsrR</b> | 32  | PCS | 100 | 408 | 4  | 0.125    | 0.125    |
| <b>CRP</b>  | 183 | PCS | 100 | 408 | 34 | 0.185792 | 0.185792 |
| <b>MarA</b> | 21  | PCS | 100 | 408 | 3  | 0.142857 | 0.142857 |

|             |    |     |     |     |    |          |          |
|-------------|----|-----|-----|-----|----|----------|----------|
| <b>PhoP</b> | 29 | PCS | 100 | 408 | 5  | 0.172414 | 0.172414 |
| <b>ArcA</b> | 58 | PCS | 100 | 408 | 9  | 0.155172 | 0.155172 |
| <b>NarL</b> | 29 | PCS | 100 | 408 | 3  | 0.103448 | 0.103448 |
| <b>Fur</b>  | 45 | PCS | 100 | 408 | 13 | 0.288889 | 0.288889 |
| <b>CpxR</b> | 30 | PCS | 100 | 408 | 6  | 0.2      | 0.2      |
| <b>SoxS</b> | 21 | PCS | 100 | 408 | 2  | 0.095238 | 0.095238 |

**Table S6.** Evaluation of the predicted regulons based on co-expression modules.

| cluID | bicSmall | bicPosSmall | bicSum   | bicPosSum | bicType | cluType     |
|-------|----------|-------------|----------|-----------|---------|-------------|
| 1     | 5.77E-05 | 1.26E-04    | 27.426   | 10.712    | default | bbs_cluster |
| 2     | 7.62E-03 | 9.83E-04    | 0        | 3.007     | default | bbs_cluster |
| 3     | 6.38E-03 | 6.18E-03    | 0        | 0         | default | bbs_cluster |
| 4     | 6.05E-07 | 6.26E-08    | 57.896   | 56.63     | default | bbs_cluster |
| 5     | 8.71E-09 | 6.22E-10    | 75.777   | 73.943    | default | bbs_cluster |
| 6     | 3.19E-05 | 1.82E-05    | 87.177   | 96.035    | default | bbs_cluster |
| 7     | 5.00E-15 | 3.68E-15    | 233.938  | 239.834   | default | bbs_cluster |
| 8     | 3.13E-07 | 1.34E-07    | 233.136  | 299.333   | default | bbs_cluster |
| 9     | 1.83E-03 | 5.25E-04    | 0        | 6.491     | default | bbs_cluster |
| 10    | 3.99E-03 | 1.03E-03    | 0        | 0         | default | bbs_cluster |
| 11    | 2.97E-02 | 1.32E-02    | 0        | 0         | default | bbs_cluster |
| 12    | 7.75E-14 | 7.75E-14    | 2264.211 | 1873.471  | default | bbs_cluster |
| 13    | 4.71E-08 | 4.02E-08    | 156.332  | 158.099   | default | bbs_cluster |
| 14    | 6.84E-08 | 6.84E-08    | 1093.024 | 1009.848  | default | bbs_cluster |
| 15    | 2.77E-08 | 9.28E-09    | 22.396   | 44.398    | default | bbs_cluster |
| 16    | 8.36E-03 | 7.33E-05    | 0        | 7.271     | default | bbs_cluster |
| 17    | 3.68E-05 | 3.97E-03    | 7.779    | 0         | default | bbs_cluster |
| 18    | 4.49E-06 | 4.49E-06    | 82.489   | 86.142    | default | bbs_cluster |
| 19    | 5.25E-05 | 5.25E-05    | 11.397   | 11.639    | default | bbs_cluster |
| 20    | 1.66E-03 | 8.45E-04    | 0        | 9.131     | default | bbs_cluster |
| 21    | 3.00E-02 | 2.11E-02    | 0        | 0         | default | bbs_cluster |
| 22    | 2.83E-06 | 2.83E-06    | 113.208  | 145.575   | default | bbs_cluster |
| 23    | 6.01E-05 | 2.47E-05    | 4.221    | 4.607     | default | bbs_cluster |
| 24    | 3.37E-04 | 6.13E-05    | 3.472    | 8.324     | default | bbs_cluster |
| 25    | 3.17E-04 | 5.78E-07    | 3.499    | 73.832    | default | bbs_cluster |
| 26    | 1.13E-06 | 1.13E-06    | 348.5    | 290.099   | default | bbs_cluster |
| 27    | 5.17E-03 | 9.83E-04    | 0        | 3.008     | default | bbs_cluster |
| 28    | 7.26E-04 | 6.99E-04    | 6.2      | 9.249     | default | bbs_cluster |
| 29    | 8.53E-04 | 2.63E-03    | 3.069    | 0         | default | bbs_cluster |
| 30    | 6.00E-07 | 1.41E-07    | 154.737  | 170.988   | default | bbs_cluster |
| 31    | 7.07E-05 | 3.38E-04    | 4.151    | 3.471     | default | bbs_cluster |
| 32    | 3.08E-02 | 1.30E-02    | 0        | 0         | default | bbs_cluster |
| 33    | 1.51E-03 | 1.39E-03    | 0        | 0         | default | bbs_cluster |
| 34    | 4.18E-04 | 4.18E-04    | 6.685    | 9.697     | default | bbs_cluster |
| 35    | 1.83E-08 | 1.83E-08    | 69.471   | 69.471    | default | bbs_cluster |
| 36    | 4.05E-05 | 1.05E-05    | 11.809   | 16.506    | default | bbs_cluster |
| 37    | 2.53E-04 | 2.25E-04    | 9.934    | 10.119    | default | bbs_cluster |
| 38    | 3.13E-05 | 8.47E-05    | 59.923   | 17.057    | default | bbs_cluster |

|    |          |          |          |          |         |             |
|----|----------|----------|----------|----------|---------|-------------|
| 39 | 1.53E-02 | 1.42E-03 | 0        | 0        | default | bbs_cluster |
| 40 | 9.57E-06 | 9.57E-06 | 70.213   | 70.213   | default | bbs_cluster |
| 41 | 4.23E-06 | 1.77E-06 | 17.717   | 22.197   | default | bbs_cluster |
| 42 | 1.50E-04 | 1.28E-05 | 6.941    | 52.174   | default | bbs_cluster |
| 43 | 7.63E-05 | 3.15E-05 | 4.117    | 4.501    | default | bbs_cluster |
| 44 | 8.72E-04 | 3.82E-04 | 3.06     | 3.418    | default | bbs_cluster |
| 45 | 2.15E-19 | 3.35E-20 | 399.222  | 427.45   | default | bbs_cluster |
| 46 | 3.60E-03 | 3.13E-03 | 0        | 0        | default | bbs_cluster |
| 47 | 2.62E-02 | 4.10E-04 | 0        | 3.387    | default | bbs_cluster |
| 48 | 8.18E-02 | 2.35E-02 | 0        | 0        | default | bbs_cluster |
| 49 | 2.37E-04 | 7.03E-05 | 6.734    | 57.512   | default | bbs_cluster |
| 50 | 2.12E-03 | 1.51E-03 | 0        | 0        | default | bbs_cluster |
| 51 | 1.76E-04 | 1.11E-04 | 29.521   | 39.736   | default | bbs_cluster |
| 52 | 1.02E-03 | 2.03E-04 | 0        | 3.693    | default | bbs_cluster |
| 53 | 3.29E-05 | 1.02E-04 | 38.02    | 33.54    | default | bbs_cluster |
| 54 | 5.06E-05 | 5.63E-06 | 184.474  | 295.641  | default | bbs_cluster |
| 55 | 1.26E-03 | 4.91E-06 | 0        | 16.14    | default | bbs_cluster |
| 56 | 1.63E-13 | 1.63E-13 | 264.153  | 259.881  | default | bbs_cluster |
| 57 | 5.14E-03 | 1.56E-04 | 0        | 10.667   | default | bbs_cluster |
| 58 | 2.89E-06 | 2.89E-06 | 66.888   | 85.899   | default | bbs_cluster |
| 59 | 8.68E-04 | 7.93E-04 | 3.061    | 3.101    | default | bbs_cluster |
| 60 | 8.87E-06 | 6.58E-06 | 131.124  | 140.389  | default | bbs_cluster |
| 61 | 2.50E-04 | 7.83E-06 | 10.421   | 43.338   | default | bbs_cluster |
| 62 | 9.52E-03 | 3.37E-04 | 0        | 3.472    | default | bbs_cluster |
| 63 | 4.83E-09 | 3.89E-09 | 1013.829 | 928.86   | default | bbs_cluster |
| 64 | 9.77E-08 | 9.77E-08 | 92.267   | 95.765   | default | bbs_cluster |
| 65 | 2.54E-05 | 9.73E-06 | 13.121   | 14.343   | default | bbs_cluster |
| 66 | 2.74E-04 | 4.41E-05 | 6.926    | 31.991   | default | bbs_cluster |
| 67 | 7.15E-03 | 2.42E-03 | 0        | 0        | default | bbs_cluster |
| 68 | 3.16E-08 | 3.16E-08 | 238.388  | 239.931  | default | bbs_cluster |
| 69 | 3.10E-07 | 2.48E-07 | 148.236  | 144.329  | default | bbs_cluster |
| 70 | 3.86E-03 | 3.86E-03 | 0        | 0        | default | bbs_cluster |
| 71 | 8.46E-05 | 4.57E-06 | 35.08    | 53.032   | default | bbs_cluster |
| 72 | 2.40E-05 | 3.90E-06 | 25.042   | 67.352   | default | bbs_cluster |
| 73 | 6.43E-07 | 1.07E-05 | 103.667  | 106.112  | default | bbs_cluster |
| 74 | 1.73E-07 | 6.55E-10 | 275.628  | 416.218  | default | bbs_cluster |
| 75 | 7.01E-04 | 7.01E-04 | 3.154    | 6.309    | default | bbs_cluster |
| 76 | 1.77E-03 | 2.76E-03 | 0        | 0        | default | bbs_cluster |
| 77 | 9.11E-03 | 9.11E-03 | 0        | 0        | default | bbs_cluster |
| 78 | 1.23E-04 | 1.23E-04 | 3.911    | 7.045    | default | bbs_cluster |
| 79 | 2.45E-02 | 1.53E-02 | 0        | 0        | default | bbs_cluster |
| 80 | 1.10E-01 | 3.28E-02 | 0        | 0        | default | bbs_cluster |
| 81 | 1.11E-03 | 1.55E-04 | 0        | 10.018   | default | bbs_cluster |
| 82 | 9.01E-06 | 9.01E-06 | 68.626   | 46.645   | default | bbs_cluster |
| 83 | 3.34E-03 | 2.75E-03 | 0        | 0        | default | bbs_cluster |
| 84 | 2.16E-11 | 7.00E-12 | 1835.73  | 1582.336 | default | bbs_cluster |
| 85 | 1.48E-04 | 8.74E-06 | 7.529    | 60.512   | default | bbs_cluster |
| 86 | 6.31E-06 | 9.79E-06 | 76.738   | 37.353   | default | bbs_cluster |
| 87 | 3.69E-08 | 2.64E-08 | 154.497  | 152.737  | default | bbs_cluster |

|     |          |          |          |          |         |             |
|-----|----------|----------|----------|----------|---------|-------------|
| 88  | 3.82E-06 | 2.08E-08 | 101.404  | 150.055  | default | bbs_cluster |
| 89  | 1.36E-04 | 8.96E-05 | 7.491    | 7.955    | default | bbs_cluster |
| 90  | 1.03E-05 | 1.03E-05 | 88.939   | 84.083   | default | bbs_cluster |
| 91  | 5.66E-06 | 1.25E-06 | 28.769   | 34.901   | default | bbs_cluster |
| 92  | 7.38E-04 | 4.46E-03 | 3.132    | 0        | default | bbs_cluster |
| 93  | 1.58E-04 | 8.09E-05 | 10.489   | 17.662   | default | bbs_cluster |
| 94  | 5.42E-03 | 5.42E-03 | 0        | 0        | default | bbs_cluster |
| 95  | 1.31E-03 | 1.31E-03 | 0        | 0        | default | bbs_cluster |
| 96  | 5.62E-03 | 2.08E-03 | 0        | 0        | default | bbs_cluster |
| 97  | 6.25E-05 | 6.25E-05 | 58.215   | 62.154   | default | bbs_cluster |
| 98  | 6.52E-13 | 6.52E-13 | 1571.783 | 1427.768 | default | bbs_cluster |
| 99  | 1.43E-03 | 1.25E-03 | 0        | 0        | default | bbs_cluster |
| 100 | 2.92E-03 | 2.14E-03 | 0        | 0        | default | bbs_cluster |
| 1   | 3.00E-02 | 4.34E-02 | 0        | 0        | default | edge_1_300  |
| 2   | 1.64E-03 | 1.29E-04 | 0        | 3.89     | default | edge_1_300  |
| 3   | 3.80E-02 | 2.27E-02 | 0        | 0        | default | edge_1_300  |
| 4   | 1.85E-03 | 1.85E-03 | 0        | 0        | default | edge_1_300  |
| 5   | 8.50E-07 | 3.08E-07 | 58.101   | 55.337   | default | edge_1_300  |
| 6   | 1.02E-13 | 1.02E-13 | 138.568  | 138.568  | default | edge_1_300  |
| 7   | 4.28E-07 | 3.80E-07 | 133.738  | 143.395  | default | edge_1_300  |
| 8   | 3.99E-03 | 1.75E-03 | 0        | 0        | default | edge_1_300  |
| 9   | 1.70E-06 | 2.43E-07 | 35.921   | 42.506   | default | edge_1_300  |
| 10  | 1.48E-02 | 5.45E-03 | 0        | 0        | default | edge_1_300  |
| 11  | 1.92E-02 | 8.43E-03 | 0        | 0        | default | edge_1_300  |
| 12  | 2.34E-03 | 2.34E-03 | 0        | 0        | default | edge_1_300  |
| 13  | 6.92E-06 | 6.32E-06 | 104.747  | 105.684  | default | edge_1_300  |
| 14  | 2.02E-02 | 3.62E-03 | 0        | 0        | default | edge_1_300  |
| 15  | 1.36E-02 | 3.61E-03 | 0        | 0        | default | edge_1_300  |
| 16  | 6.92E-07 | 6.92E-07 | 132.125  | 133.193  | default | edge_1_300  |
| 17  | 1.96E-01 | 3.35E-02 | 0        | 0        | default | edge_1_300  |
| 18  | 2.09E-05 | 2.09E-05 | 7.919    | 7.919    | default | edge_1_300  |
| 19  | 7.36E-06 | 7.36E-06 | 73.012   | 73.012   | default | edge_1_300  |
| 20  | 1.09E-09 | 4.12E-10 | 25.583   | 27.777   | default | edge_1_300  |
| 21  | 6.02E-02 | 3.61E-02 | 0        | 0        | default | edge_1_300  |
| 22  | 4.02E-05 | 1.89E-05 | 46.917   | 47.83    | default | edge_1_300  |
| 23  | 6.74E-02 | 4.05E-02 | 0        | 0        | default | edge_1_300  |
| 24  | 5.21E-02 | 5.17E-03 | 0        | 0        | default | edge_1_300  |
| 25  | 3.75E-08 | 1.42E-08 | 550.976  | 642.9    | default | edge_1_300  |
| 26  | 1.36E-02 | 8.69E-03 | 0        | 0        | default | edge_1_300  |
| 27  | 4.55E-02 | 2.72E-02 | 0        | 0        | default | edge_1_300  |
| 28  | 8.09E-04 | 8.09E-04 | 3.092    | 3.092    | default | edge_1_300  |
| 29  | 7.41E-03 | 7.41E-03 | 0        | 0        | default | edge_1_300  |
| 30  | 1.32E-08 | 6.77E-09 | 32.352   | 66.202   | default | edge_1_300  |
| 31  | 5.60E-03 | 5.28E-03 | 0        | 0        | default | edge_1_300  |
| 32  | 1.15E-02 | 2.24E-03 | 0        | 0        | default | edge_1_300  |
| 33  | 1.73E-07 | 6.24E-08 | 68.229   | 64.686   | default | edge_1_300  |
| 34  | 1.70E-02 | 1.53E-03 | 0        | 0        | default | edge_1_300  |
| 35  | 3.09E-02 | 3.09E-02 | 0        | 0        | default | edge_1_300  |
| 36  | 3.82E-03 | 1.91E-04 | 0        | 3.719    | default | edge_1_300  |



|    |          |          |          |          |         |            |
|----|----------|----------|----------|----------|---------|------------|
| 37 | 1.12E-03 | 1.12E-03 | 0        | 0        | default | edge_1_300 |
| 38 | 6.52E-04 | 6.52E-04 | 43.811   | 43.811   | default | edge_1_300 |
| 39 | 5.74E-03 | 4.58E-04 | 0        | 3.339    | default | edge_1_300 |
| 40 | 8.44E-03 | 1.94E-03 | 0        | 0        | default | edge_1_300 |
| 41 | 7.94E-07 | 2.24E-07 | 74.774   | 68.683   | default | edge_1_300 |
| 42 | 1.72E-02 | 8.88E-03 | 0        | 0        | default | edge_1_300 |
| 43 | 1.54E-02 | 9.15E-03 | 0        | 0        | default | edge_1_300 |
| 44 | 1.20E-02 | 2.59E-03 | 0        | 0        | default | edge_1_300 |
| 45 | 1.30E-08 | 1.30E-08 | 115.197  | 115.197  | default | edge_1_300 |
| 46 | 7.56E-04 | 5.35E-04 | 3.121    | 3.272    | default | edge_1_300 |
| 47 | 6.24E-05 | 5.32E-05 | 52.502   | 53.056   | default | edge_1_300 |
| 48 | 6.74E-02 | 4.05E-02 | 0        | 0        | default | edge_1_300 |
| 49 | 5.28E-02 | 3.17E-02 | 0        | 0        | default | edge_1_300 |
| 50 | 2.24E-03 | 2.24E-03 | 0        | 0        | default | edge_1_300 |
| 51 | 3.00E-24 | 3.00E-24 | 5298.484 | 4035.556 | default | edge_1_300 |
| 52 | 2.44E-11 | 9.10E-12 | 43.349   | 49.469   | default | edge_1_300 |
| 53 | 1.10E-02 | 8.33E-03 | 0        | 0        | default | edge_1_300 |
| 54 | 6.89E-08 | 3.36E-08 | 638.926  | 716.951  | default | edge_1_300 |
| 55 | 5.10E-03 | 5.10E-03 | 0        | 0        | default | edge_1_300 |
| 56 | 1.14E-02 | 8.16E-03 | 0        | 0        | default | edge_1_300 |
| 57 | 2.33E-05 | 9.97E-05 | 229.565  | 139.886  | default | edge_1_300 |
| 58 | 2.96E-07 | 2.96E-07 | 659.427  | 648.186  | default | edge_1_300 |
| 59 | 8.92E-06 | 8.49E-06 | 15.887   | 16.096   | default | edge_1_300 |
| 60 | 2.58E-08 | 2.58E-08 | 110.739  | 110.739  | default | edge_1_300 |
| 61 | 1.53E-03 | 1.28E-03 | 0        | 0        | default | edge_1_300 |
| 62 | 1.48E-02 | 1.29E-02 | 0        | 0        | default | edge_1_300 |
| 63 | 2.19E-02 | 7.73E-03 | 0        | 0        | default | edge_1_300 |
| 64 | 6.93E-13 | 6.93E-13 | 330.315  | 323.343  | default | edge_1_300 |
| 65 | 2.85E-06 | 2.59E-06 | 135.145  | 130.921  | default | edge_1_300 |
| 66 | 1.54E-03 | 2.98E-03 | 0        | 0        | default | edge_1_300 |
| 67 | 1.54E-02 | 9.15E-03 | 0        | 0        | default | edge_1_300 |
| 68 | 5.28E-02 | 3.17E-02 | 0        | 0        | default | edge_1_300 |
| 69 | 3.29E-05 | 3.06E-05 | 99.124   | 100.053  | default | edge_1_300 |
| 70 | 3.05E-02 | 1.82E-02 | 0        | 0        | default | edge_1_300 |
| 71 | 1.02E-07 | 8.99E-08 | 104.523  | 105.465  | default | edge_1_300 |
| 72 | 8.85E-10 | 8.85E-10 | 132.059  | 132.059  | default | edge_1_300 |
| 73 | 3.27E-03 | 1.60E-03 | 0        | 0        | default | edge_1_300 |
| 74 | 2.38E-04 | 8.96E-05 | 3.623    | 4.048    | default | edge_1_300 |
| 75 | 4.56E-05 | 1.24E-05 | 27.219   | 33.769   | default | edge_1_300 |
| 76 | 4.55E-02 | 2.72E-02 | 0        | 0        | default | edge_1_300 |
| 77 | 3.05E-02 | 1.82E-02 | 0        | 0        | default | edge_1_300 |
| 78 | 1.20E-03 | 9.88E-04 | 0        | 3.005    | default | edge_1_300 |
| 79 | 3.80E-02 | 2.27E-02 | 0        | 0        | default | edge_1_300 |
| 80 | 6.02E-02 | 3.61E-02 | 0        | 0        | default | edge_1_300 |
| 81 | 1.09E-03 | 3.38E-03 | 0        | 0        | default | edge_1_300 |
| 82 | 5.60E-10 | 4.67E-10 | 238.991  | 292.808  | default | edge_1_300 |
| 83 | 2.46E-02 | 1.06E-03 | 0        | 0        | default | edge_1_300 |
| 84 | 8.09E-04 | 6.82E-04 | 6.149    | 12.39    | default | edge_1_300 |
| 85 | 6.02E-02 | 3.61E-02 | 0        | 0        | default | edge_1_300 |

|     |          |          |          |          |         |            |
|-----|----------|----------|----------|----------|---------|------------|
| 86  | 1.76E-03 | 1.76E-03 | 0        | 0        | default | edge_1_300 |
| 87  | 1.77E-10 | 1.75E-09 | 261.296  | 254.052  | default | edge_1_300 |
| 88  | 6.04E-03 | 1.04E-03 | 0        | 0        | default | edge_1_300 |
| 89  | 3.32E-07 | 1.90E-07 | 57.227   | 51.116   | default | edge_1_300 |
| 90  | 3.61E-02 | 2.80E-02 | 0        | 0        | default | edge_1_300 |
| 91  | 3.96E-03 | 3.96E-03 | 0        | 0        | default | edge_1_300 |
| 92  | 3.30E-05 | 1.22E-05 | 37.603   | 38.218   | default | edge_1_300 |
| 93  | 6.85E-02 | 9.60E-03 | 0        | 0        | default | edge_1_300 |
| 94  | 8.47E-04 | 6.73E-05 | 21.287   | 44.431   | default | edge_1_300 |
| 95  | 3.98E-02 | 3.61E-02 | 0        | 0        | default | edge_1_300 |
| 96  | 7.13E-04 | 3.88E-04 | 12.375   | 19.006   | default | edge_1_300 |
| 97  | 3.99E-03 | 4.58E-04 | 0        | 3.339    | default | edge_1_300 |
| 98  | 1.46E-02 | 1.19E-02 | 0        | 0        | default | edge_1_300 |
| 99  | 8.33E-03 | 8.13E-03 | 0        | 0        | default | edge_1_300 |
| 100 | 3.97E-03 | 2.31E-04 | 0        | 3.636    | default | edge_1_300 |
| 1   | 7.05E-07 | 6.25E-07 | 97.048   | 98.088   | default | gfr        |
| 2   | 6.17E-04 | 5.55E-04 | 6.236    | 6.336    | default | gfr        |
| 3   | 2.15E-06 | 1.90E-06 | 119.041  | 116.668  | default | gfr        |
| 4   | 5.22E-20 | 5.22E-20 | 3282.415 | 2833.535 | default | gfr        |
| 5   | 8.89E-02 | 5.37E-02 | 0        | 0        | default | gfr        |
| 6   | 4.17E-08 | 2.74E-07 | 162.007  | 156.179  | default | gfr        |
| 7   | 2.84E-07 | 2.56E-07 | 37.59    | 30.88    | default | gfr        |
| 8   | 6.09E-06 | 5.37E-06 | 57.695   | 58.515   | default | gfr        |
| 9   | 1.64E-14 | 1.03E-14 | 13.785   | 13.987   | default | gfr        |
| 10  | 3.03E-06 | 2.87E-06 | 188.761  | 168.453  | default | gfr        |
| 11  | 9.29E-04 | 9.29E-04 | 3.032    | 3.032    | default | gfr        |
| 12  | 4.08E-06 | 3.44E-06 | 21.113   | 14.981   | default | gfr        |
| 13  | 2.61E-15 | 1.12E-15 | 1961.498 | 1490.432 | default | gfr        |
| 14  | 4.73E-06 | 4.73E-06 | 140.243  | 137.429  | default | gfr        |
| 15  | 2.81E-04 | 2.81E-04 | 3.551    | 3.551    | default | gfr        |
| 16  | 5.45E-57 | 5.45E-57 | 9319.857 | 7675.902 | default | gfr        |
| 17  | 1.82E-07 | 5.11E-08 | 66.154   | 62.256   | default | gfr        |
| 18  | 3.68E-03 | 3.68E-03 | 0        | 0        | default | gfr        |
| 19  | 1.02E-13 | 1.02E-13 | 1726.958 | 1525.92  | default | gfr        |
| 20  | 3.88E-15 | 3.42E-15 | 163.889  | 162.285  | default | gfr        |
| 21  | 3.68E-19 | 3.05E-19 | 483.63   | 471.862  | default | gfr        |
| 22  | 8.77E-04 | 7.76E-05 | 3.057    | 4.11     | default | gfr        |
| 23  | 4.49E-03 | 4.49E-03 | 0        | 0        | default | gfr        |
| 24  | 2.79E-05 | 2.35E-05 | 27.83    | 43.234   | default | gfr        |
| 25  | 4.25E-04 | 3.28E-04 | 9.808    | 10.038   | default | gfr        |
| 26  | 3.08E-06 | 2.72E-06 | 94.515   | 101.827  | default | gfr        |
| 27  | 7.38E-06 | 7.38E-06 | 206.551  | 188.532  | default | gfr        |
| 28  | 1.59E-07 | 1.59E-07 | 555.794  | 493.46   | default | gfr        |
| 29  | 1.49E-04 | 1.49E-04 | 48.146   | 49.903   | default | gfr        |
| 30  | 1.40E-02 | 1.05E-02 | 0        | 0        | default | gfr        |
| 31  | 1.26E-02 | 1.26E-02 | 0        | 0        | default | gfr        |
| 32  | 2.50E-03 | 2.50E-03 | 0        | 0        | default | gfr        |
| 33  | 6.35E-10 | 6.35E-10 | 132.481  | 132.481  | default | gfr        |
| 34  | 8.21E-06 | 8.21E-06 | 483.765  | 380.931  | default | gfr        |

|    |          |          |         |         |         |     |
|----|----------|----------|---------|---------|---------|-----|
| 35 | 5.70E-03 | 5.70E-03 | 0       | 0       | default | gfr |
| 36 | 3.45E-03 | 3.29E-03 | 0       | 0       | default | gfr |
| 37 | 1.76E-03 | 1.76E-03 | 0       | 0       | default | gfr |
| 38 | 1.60E-03 | 1.17E-03 | 0       | 0       | default | gfr |
| 39 | 6.74E-02 | 4.05E-02 | 0       | 0       | default | gfr |
| 40 | 5.12E-03 | 1.84E-03 | 0       | 0       | default | gfr |
| 41 | 1.16E-05 | 9.56E-06 | 126.415 | 131.168 | default | gfr |
| 42 | 1.27E-04 | 1.27E-04 | 3.896   | 3.896   | default | gfr |
| 43 | 2.82E-07 | 2.82E-07 | 716.272 | 548.748 | default | gfr |
| 44 | 6.15E-03 | 5.56E-03 | 0       | 0       | default | gfr |
| 45 | 7.61E-05 | 1.86E-04 | 39.827  | 36.015  | default | gfr |
| 46 | 4.56E-07 | 4.56E-07 | 280.107 | 242.888 | default | gfr |
| 47 | 3.29E-05 | 3.29E-05 | 284.774 | 290.59  | default | gfr |
| 48 | 4.01E-05 | 7.83E-05 | 110.473 | 93.512  | default | gfr |
| 49 | 1.77E-10 | 1.75E-09 | 223.693 | 215.835 | default | gfr |
| 50 | 9.70E-07 | 8.14E-07 | 328.469 | 273.471 | default | gfr |
| 51 | 3.85E-02 | 1.14E-02 | 0       | 0       | default | gfr |
| 52 | 0.00E+00 | 0.00E+00 | 102.521 | 102.521 | default | gfr |
| 53 | 6.11E-04 | 1.59E-03 | 12.582  | 0       | default | gfr |
| 54 | 1.54E-10 | 1.41E-10 | 19.278  | 19.316  | default | gfr |
| 55 | 1.20E-03 | 1.20E-03 | 0       | 0       | default | gfr |
| 56 | 2.10E-04 | 2.10E-04 | 3.678   | 3.678   | default | gfr |
| 57 | 3.58E-07 | 2.98E-07 | 10.515  | 10.758  | default | gfr |
| 58 | 2.83E-04 | 1.96E-04 | 35.156  | 41.076  | default | gfr |
| 59 | 7.31E-03 | 1.75E-03 | 0       | 0       | default | gfr |
| 60 | 9.11E-04 | 9.11E-04 | 3.04    | 3.04    | default | gfr |
| 61 | 1.53E-05 | 1.53E-05 | 36.74   | 22.212  | default | gfr |
| 62 | 3.89E-03 | 3.89E-03 | 0       | 0       | default | gfr |
| 63 | 5.28E-02 | 3.17E-02 | 0       | 0       | default | gfr |
| 64 | 9.37E-04 | 3.26E-04 | 3.028   | 9.523   | default | gfr |
| 65 | 1.10E-02 | 6.77E-03 | 0       | 0       | default | gfr |
| 66 | 3.23E-03 | 5.30E-04 | 0       | 3.276   | default | gfr |
| 67 | 3.12E-03 | 2.49E-03 | 0       | 0       | default | gfr |
| 68 | 1.21E-03 | 1.21E-03 | 0       | 0       | default | gfr |
| 69 | 2.70E-03 | 2.70E-03 | 0       | 0       | default | gfr |
| 70 | 2.04E-03 | 1.94E-03 | 0       | 0       | default | gfr |
| 71 | 1.43E-06 | 4.06E-07 | 59.737  | 78.153  | default | gfr |
| 72 | 4.55E-02 | 2.72E-02 | 0       | 0       | default | gfr |
| 73 | 6.00E-07 | 6.00E-07 | 90.286  | 90.286  | default | gfr |
| 74 | 4.34E-13 | 3.42E-13 | 267.294 | 261.171 | default | gfr |
| 75 | 5.28E-02 | 3.17E-02 | 0       | 0       | default | gfr |
| 76 | 5.69E-07 | 1.05E-07 | 222.598 | 275.949 | default | gfr |
| 77 | 2.25E-04 | 2.25E-04 | 13.865  | 20.123  | default | gfr |
| 78 | 1.78E-05 | 3.78E-06 | 7.857   | 9.016   | default | gfr |
| 79 | 9.90E-08 | 9.90E-08 | 1473.32 | 1195.67 | default | gfr |
| 80 | 1.66E-03 | 8.00E-04 | 0       | 15.41   | default | gfr |
| 81 | 2.88E-03 | 2.88E-03 | 0       | 0       | default | gfr |
| 82 | 1.37E-35 | 1.37E-35 | 440.786 | 440.786 | default | gfr |
| 83 | 6.81E-06 | 6.81E-06 | 91.6    | 122.245 | default | gfr |

|     |          |          |         |         |         |     |
|-----|----------|----------|---------|---------|---------|-----|
| 84  | 4.55E-02 | 2.72E-02 | 0       | 0       | default | gfr |
| 85  | 1.29E-03 | 1.23E-03 | 0       | 0       | default | gfr |
| 86  | 5.13E-02 | 2.60E-03 | 0       | 0       | default | gfr |
| 87  | 2.62E-02 | 1.23E-02 | 0       | 0       | default | gfr |
| 88  | 8.18E-02 | 4.93E-02 | 0       | 0       | default | gfr |
| 89  | 1.87E-03 | 1.87E-03 | 0       | 0       | default | gfr |
| 90  | 2.48E-03 | 1.51E-03 | 0       | 0       | default | gfr |
| 91  | 1.24E-11 | 1.24E-11 | 425.044 | 518.683 | default | gfr |
| 92  | 4.34E-09 | 3.62E-09 | 35.686  | 29.521  | default | gfr |
| 93  | 9.36E-06 | 1.14E-06 | 218.18  | 202.602 | default | gfr |
| 94  | 1.54E-02 | 2.27E-02 | 0       | 0       | default | gfr |
| 95  | 6.98E-03 | 6.39E-03 | 0       | 0       | default | gfr |
| 96  | 4.08E-04 | 2.99E-04 | 28.492  | 66.47   | default | gfr |
| 97  | 1.03E-04 | 3.35E-04 | 58.924  | 50.417  | default | gfr |
| 98  | 2.43E-05 | 1.99E-05 | 47.145  | 47.594  | default | gfr |
| 99  | 5.11E-04 | 5.11E-04 | 12.556  | 18.807  | default | gfr |
| 100 | 3.98E-25 | 3.98E-25 | 357.874 | 357.874 | default | gfr |
| 1   | 5.28E-02 | 3.60E-03 | 0       | 0       | default | pcs |
| 2   | 3.31E-06 | 3.31E-06 | 354.028 | 410.366 | default | pcs |
| 3   | 2.42E-02 | 8.05E-03 | 0       | 0       | default | pcs |
| 4   | 6.83E-04 | 6.47E-04 | 9.29    | 12.471  | default | pcs |
| 5   | 2.54E-03 | 1.17E-03 | 0       | 0       | default | pcs |
| 6   | 4.44E-04 | 7.56E-06 | 22.266  | 73.225  | default | pcs |
| 7   | 5.23E-05 | 4.86E-05 | 93.917  | 94.804  | default | pcs |
| 8   | 1.76E-03 | 9.59E-04 | 0       | 3.018   | default | pcs |
| 9   | 1.34E-03 | 9.83E-04 | 0       | 3.008   | default | pcs |
| 10  | 4.08E-03 | 2.72E-03 | 0       | 0       | default | pcs |
| 11  | 4.08E-03 | 2.64E-03 | 0       | 0       | default | pcs |
| 12  | 7.80E-03 | 3.59E-03 | 0       | 0       | default | pcs |
| 13  | 5.58E-05 | 4.22E-05 | 25.88   | 29.541  | default | pcs |
| 14  | 8.43E-03 | 8.27E-03 | 0       | 0       | default | pcs |
| 15  | 7.87E-05 | 7.87E-05 | 7.881   | 7.881   | default | pcs |
| 16  | 1.17E-10 | 8.09E-11 | 9.934   | 10.092  | default | pcs |
| 17  | 3.44E-06 | 3.44E-06 | 5.464   | 5.464   | default | pcs |
| 18  | 3.05E-02 | 1.82E-02 | 0       | 0       | default | pcs |
| 19  | 5.11E-04 | 5.11E-04 | 22.575  | 28.697  | default | pcs |
| 20  | 1.10E-03 | 9.11E-04 | 0       | 3.04    | default | pcs |
| 21  | 1.92E-02 | 5.63E-03 | 0       | 0       | default | pcs |
| 22  | 3.77E-08 | 3.77E-08 | 84.813  | 61.987  | default | pcs |
| 23  | 2.77E-11 | 2.77E-11 | 154.608 | 154.608 | default | pcs |
| 24  | 3.80E-02 | 2.27E-02 | 0       | 0       | default | pcs |
| 25  | 4.55E-02 | 2.72E-02 | 0       | 0       | default | pcs |
| 26  | 6.02E-02 | 3.61E-02 | 0       | 0       | default | pcs |
| 27  | 1.47E-03 | 1.40E-03 | 0       | 0       | default | pcs |
| 28  | 1.45E-02 | 1.45E-02 | 0       | 0       | default | pcs |
| 29  | 3.80E-02 | 2.27E-02 | 0       | 0       | default | pcs |
| 30  | 5.38E-04 | 5.38E-04 | 3.269   | 3.269   | default | pcs |
| 31  | 2.54E-03 | 2.43E-03 | 0       | 0       | default | pcs |
| 32  | 7.46E-02 | 4.49E-02 | 0       | 0       | default | pcs |

|    |          |          |         |         |         |     |
|----|----------|----------|---------|---------|---------|-----|
| 33 | 1.15E-02 | 7.37E-03 | 0       | 0       | default | pcs |
| 34 | 2.88E-03 | 9.83E-04 | 0       | 3.008   | default | pcs |
| 35 | 3.90E-03 | 2.49E-03 | 0       | 0       | default | pcs |
| 36 | 6.37E-04 | 8.74E-05 | 3.196   | 24.734  | default | pcs |
| 37 | 1.47E-03 | 1.47E-03 | 0       | 0       | default | pcs |
| 38 | 1.29E-02 | 4.74E-03 | 0       | 0       | default | pcs |
| 39 | 3.94E-02 | 1.93E-02 | 0       | 0       | default | pcs |
| 40 | 1.10E-05 | 1.10E-05 | 643.316 | 503.14  | default | pcs |
| 41 | 8.42E-04 | 8.42E-04 | 3.075   | 3.075   | default | pcs |
| 42 | 1.95E-04 | 1.95E-04 | 22.284  | 22.54   | default | pcs |
| 43 | 1.08E-03 | 1.08E-03 | 0       | 0       | default | pcs |
| 44 | 1.53E-04 | 1.49E-03 | 7.362   | 0       | default | pcs |
| 45 | 6.20E-03 | 3.74E-04 | 0       | 3.427   | default | pcs |
| 46 | 1.59E-03 | 1.59E-03 | 0       | 0       | default | pcs |
| 47 | 3.34E-02 | 1.40E-02 | 0       | 0       | default | pcs |
| 48 | 8.36E-03 | 3.04E-03 | 0       | 0       | default | pcs |
| 49 | 1.36E-05 | 1.30E-05 | 45.62   | 27.597  | default | pcs |
| 50 | 2.14E-04 | 2.14E-04 | 51.292  | 74.233  | default | pcs |
| 51 | 1.90E-04 | 1.66E-04 | 25.01   | 25.069  | default | pcs |
| 52 | 1.18E-03 | 6.43E-04 | 0       | 3.192   | default | pcs |
| 53 | 6.24E-05 | 5.32E-05 | 52.502  | 53.056  | default | pcs |
| 54 | 5.19E-02 | 5.12E-03 | 0       | 0       | default | pcs |
| 55 | 4.26E-03 | 8.03E-03 | 0       | 0       | default | pcs |
| 56 | 4.04E-07 | 1.23E-07 | 39.239  | 37.391  | default | pcs |
| 57 | 1.54E-04 | 1.38E-04 | 3.814   | 3.861   | default | pcs |
| 58 | 4.66E-03 | 4.27E-03 | 0       | 0       | default | pcs |
| 59 | 3.66E-03 | 3.66E-03 | 0       | 0       | default | pcs |
| 60 | 2.26E-03 | 1.10E-03 | 0       | 0       | default | pcs |
| 61 | 1.15E-05 | 2.43E-06 | 8.181   | 12.401  | default | pcs |
| 62 | 5.28E-02 | 2.80E-02 | 0       | 0       | default | pcs |
| 63 | 3.80E-02 | 2.27E-02 | 0       | 0       | default | pcs |
| 64 | 1.38E-03 | 1.32E-03 | 0       | 0       | default | pcs |
| 65 | 2.43E-03 | 6.22E-04 | 0       | 3.206   | default | pcs |
| 66 | 1.05E-02 | 4.74E-03 | 0       | 0       | default | pcs |
| 67 | 1.10E-05 | 1.10E-05 | 4.959   | 4.959   | default | pcs |
| 68 | 6.00E-05 | 4.90E-05 | 17.668  | 17.944  | default | pcs |
| 69 | 6.54E-04 | 6.54E-04 | 12.439  | 15.544  | default | pcs |
| 70 | 2.74E-04 | 7.45E-05 | 3.562   | 10.832  | default | pcs |
| 71 | 7.10E-03 | 1.57E-03 | 0       | 0       | default | pcs |
| 72 | 1.51E-05 | 1.51E-05 | 76.003  | 32.527  | default | pcs |
| 73 | 6.19E-07 | 6.19E-07 | 199.55  | 187.798 | default | pcs |
| 74 | 4.78E-06 | 4.36E-06 | 173.535 | 159.31  | default | pcs |
| 75 | 3.64E-05 | 1.32E-05 | 53.767  | 54.586  | default | pcs |
| 76 | 1.35E-07 | 1.22E-07 | 174.484 | 168.959 | default | pcs |
| 77 | 1.25E-06 | 1.10E-06 | 71.466  | 72.433  | default | pcs |
| 78 | 2.36E-04 | 2.08E-04 | 22.746  | 13.2    | default | pcs |
| 79 | 4.55E-02 | 2.72E-02 | 0       | 0       | default | pcs |
| 80 | 6.02E-02 | 3.61E-02 | 0       | 0       | default | pcs |
| 81 | 4.04E-03 | 4.04E-03 | 0       | 0       | default | pcs |

|     |          |          |          |          |         |             |
|-----|----------|----------|----------|----------|---------|-------------|
| 82  | 3.18E-05 | 4.63E-05 | 59.469   | 46.929   | default | pcs         |
| 83  | 2.14E-03 | 2.14E-03 | 0        | 0        | default | pcs         |
| 84  | 8.35E-03 | 5.13E-03 | 0        | 0        | default | pcs         |
| 85  | 1.54E-03 | 4.99E-03 | 0        | 0        | default | pcs         |
| 86  | 5.69E-04 | 5.69E-04 | 3.245    | 3.245    | default | pcs         |
| 87  | 2.66E-03 | 2.66E-03 | 0        | 0        | default | pcs         |
| 88  | 1.37E-06 | 1.37E-06 | 118.222  | 119.165  | default | pcs         |
| 89  | 3.05E-02 | 8.64E-03 | 0        | 0        | default | pcs         |
| 90  | 4.27E-03 | 1.47E-03 | 0        | 0        | default | pcs         |
| 91  | 6.68E-03 | 1.46E-04 | 0        | 3.836    | default | pcs         |
| 92  | 5.12E-04 | 4.79E-04 | 9.603    | 9.696    | default | pcs         |
| 93  | 2.36E-08 | 1.87E-08 | 277.359  | 240.778  | default | pcs         |
| 94  | 5.13E-03 | 4.83E-03 | 0        | 0        | default | pcs         |
| 95  | 1.26E-03 | 1.26E-03 | 0        | 0        | default | pcs         |
| 96  | 4.06E-02 | 1.52E-02 | 0        | 0        | default | pcs         |
| 97  | 3.43E-04 | 3.43E-04 | 6.581    | 6.608    | default | pcs         |
| 98  | 4.48E-04 | 2.13E-04 | 16.308   | 25.009   | default | pcs         |
| 99  | 1.77E-10 | 1.75E-09 | 223.693  | 215.835  | default | pcs         |
| 100 | 3.00E-11 | 3.00E-11 | 149.623  | 149.623  | default | pcs         |
| 1   | 3.69E-08 | 3.69E-08 | 30.777   | 7.432    | loose   | bbs_cluster |
| 2   | 7.97E-03 | 7.97E-03 | 0        | 0        | loose   | bbs_cluster |
| 3   | 4.88E-03 | 2.00E-02 | 0        | 0        | loose   | bbs_cluster |
| 4   | 5.95E-07 | 1.51E-07 | 44.534   | 47.736   | loose   | bbs_cluster |
| 5   | 1.53E-07 | 1.06E-08 | 56.757   | 60.941   | loose   | bbs_cluster |
| 6   | 1.98E-05 | 1.98E-05 | 96.259   | 103.239  | loose   | bbs_cluster |
| 7   | 6.33E-19 | 2.81E-19 | 292.582  | 300.121  | loose   | bbs_cluster |
| 8   | 3.13E-07 | 1.89E-07 | 219.137  | 280.211  | loose   | bbs_cluster |
| 9   | 2.89E-03 | 8.14E-04 | 0        | 3.089    | loose   | bbs_cluster |
| 10  | 2.00E-03 | 1.68E-03 | 0        | 0        | loose   | bbs_cluster |
| 11  | 7.46E-02 | 3.02E-02 | 0        | 0        | loose   | bbs_cluster |
| 12  | 7.75E-14 | 7.75E-14 | 2250.626 | 1738.177 | loose   | bbs_cluster |
| 13  | 9.85E-08 | 6.88E-08 | 160.888  | 163.315  | loose   | bbs_cluster |
| 14  | 8.05E-10 | 8.05E-10 | 1017.369 | 907.939  | loose   | bbs_cluster |
| 15  | 2.03E-08 | 1.31E-08 | 32.518   | 63.161   | loose   | bbs_cluster |
| 16  | 9.01E-03 | 4.57E-04 | 0        | 3.34     | loose   | bbs_cluster |
| 17  | 4.04E-05 | 4.04E-05 | 8.359    | 4.393    | loose   | bbs_cluster |
| 18  | 4.49E-06 | 4.49E-06 | 84.093   | 88.463   | loose   | bbs_cluster |
| 19  | 3.68E-05 | 2.88E-05 | 22.987   | 26.537   | loose   | bbs_cluster |
| 20  | 6.67E-04 | 2.02E-05 | 3.176    | 11.557   | loose   | bbs_cluster |
| 21  | 9.70E-03 | 9.32E-03 | 0        | 0        | loose   | bbs_cluster |
| 22  | 2.45E-06 | 2.45E-06 | 129.16   | 162.736  | loose   | bbs_cluster |
| 23  | 4.67E-05 | 3.28E-05 | 4.331    | 7.525    | loose   | bbs_cluster |
| 24  | 3.11E-04 | 4.99E-05 | 6.935    | 24.292   | loose   | bbs_cluster |
| 25  | 3.17E-04 | 2.85E-08 | 3.499    | 104.294  | loose   | bbs_cluster |
| 26  | 1.13E-06 | 1.13E-06 | 368.558  | 296.404  | loose   | bbs_cluster |
| 27  | 5.93E-03 | 6.82E-04 | 0        | 6.174    | loose   | bbs_cluster |
| 28  | 1.03E-03 | 9.00E-04 | 0        | 6.048    | loose   | bbs_cluster |
| 29  | 1.12E-03 | 2.14E-03 | 0        | 0        | loose   | bbs_cluster |
| 30  | 2.41E-05 | 7.65E-06 | 170.478  | 176.408  | loose   | bbs_cluster |

|    |          |          |          |         |       |             |
|----|----------|----------|----------|---------|-------|-------------|
| 31 | 9.46E-03 | 1.12E-02 | 0        | 0       | loose | bbs_cluster |
| 32 | 4.39E-03 | 1.16E-03 | 0        | 0       | loose | bbs_cluster |
| 33 | 1.24E-03 | 1.15E-03 | 0        | 0       | loose | bbs_cluster |
| 34 | 4.55E-04 | 4.55E-04 | 6.648    | 6.648   | loose | bbs_cluster |
| 35 | 2.16E-08 | 2.16E-08 | 72.638   | 79.305  | loose | bbs_cluster |
| 36 | 1.25E-04 | 3.39E-05 | 24.05    | 29.144  | loose | bbs_cluster |
| 37 | 1.21E-04 | 1.21E-04 | 6.951    | 7.028   | loose | bbs_cluster |
| 38 | 1.85E-05 | 8.47E-05 | 58.295   | 17.392  | loose | bbs_cluster |
| 39 | 1.20E-02 | 1.05E-02 | 0        | 0       | loose | bbs_cluster |
| 40 | 9.57E-06 | 9.57E-06 | 68.482   | 68.482  | loose | bbs_cluster |
| 41 | 5.36E-05 | 2.21E-05 | 17.925   | 21.702  | loose | bbs_cluster |
| 42 | 1.20E-03 | 3.02E-05 | 0        | 64.9    | loose | bbs_cluster |
| 43 | 3.15E-05 | 2.86E-05 | 8.727    | 12.531  | loose | bbs_cluster |
| 44 | 1.12E-04 | 3.11E-04 | 17.767   | 20.403  | loose | bbs_cluster |
| 45 | 1.10E-17 | 6.11E-18 | 378.803  | 410.206 | loose | bbs_cluster |
| 46 | 2.29E-04 | 1.85E-04 | 6.786    | 6.955   | loose | bbs_cluster |
| 47 | 1.13E-02 | 2.02E-04 | 0        | 3.695   | loose | bbs_cluster |
| 48 | 1.36E-02 | 1.33E-02 | 0        | 0       | loose | bbs_cluster |
| 49 | 2.37E-04 | 2.37E-04 | 6.734    | 44.438  | loose | bbs_cluster |
| 50 | 1.99E-03 | 1.51E-03 | 0        | 0       | loose | bbs_cluster |
| 51 | 3.74E-04 | 2.26E-04 | 35.221   | 82.233  | loose | bbs_cluster |
| 52 | 6.70E-04 | 5.69E-04 | 3.174    | 3.245   | loose | bbs_cluster |
| 53 | 2.24E-05 | 7.71E-05 | 22.482   | 21.354  | loose | bbs_cluster |
| 54 | 4.58E-05 | 4.24E-06 | 131.29   | 300.24  | loose | bbs_cluster |
| 55 | 4.13E-06 | 2.82E-06 | 15.881   | 63.751  | loose | bbs_cluster |
| 56 | 4.87E-13 | 4.87E-13 | 241.46   | 255.811 | loose | bbs_cluster |
| 57 | 3.31E-03 | 1.74E-03 | 0        | 0       | loose | bbs_cluster |
| 58 | 2.89E-06 | 2.89E-06 | 71.411   | 79.035  | loose | bbs_cluster |
| 59 | 2.14E-03 | 1.80E-03 | 0        | 0       | loose | bbs_cluster |
| 60 | 4.54E-05 | 2.77E-05 | 101.616  | 120.839 | loose | bbs_cluster |
| 61 | 3.98E-04 | 1.84E-05 | 9.536    | 58.6    | loose | bbs_cluster |
| 62 | 9.16E-03 | 1.55E-03 | 0        | 0       | loose | bbs_cluster |
| 63 | 5.63E-11 | 5.63E-11 | 1029.576 | 871.824 | loose | bbs_cluster |
| 64 | 1.21E-07 | 1.21E-07 | 94.33    | 94.95   | loose | bbs_cluster |
| 65 | 5.39E-05 | 7.34E-06 | 18.096   | 33.044  | loose | bbs_cluster |
| 66 | 6.11E-04 | 4.90E-05 | 3.214    | 24.115  | loose | bbs_cluster |
| 67 | 8.26E-03 | 1.89E-03 | 0        | 0       | loose | bbs_cluster |
| 68 | 4.20E-08 | 4.20E-08 | 220.999  | 223.257 | loose | bbs_cluster |
| 69 | 2.64E-07 | 2.29E-07 | 128.783  | 131.923 | loose | bbs_cluster |
| 70 | 3.86E-03 | 3.86E-03 | 0        | 0       | loose | bbs_cluster |
| 71 | 1.28E-05 | 4.57E-06 | 63.749   | 113.747 | loose | bbs_cluster |
| 72 | 5.09E-07 | 1.41E-06 | 55.929   | 126.365 | loose | bbs_cluster |
| 73 | 4.28E-06 | 2.88E-06 | 44.224   | 70.702  | loose | bbs_cluster |
| 74 | 1.16E-07 | 3.04E-08 | 246.11   | 383.298 | loose | bbs_cluster |
| 75 | 7.01E-04 | 1.84E-04 | 12.279   | 6.891   | loose | bbs_cluster |
| 76 | 3.05E-03 | 3.05E-03 | 0        | 0       | loose | bbs_cluster |
| 77 | 9.11E-03 | 5.73E-03 | 0        | 0       | loose | bbs_cluster |
| 78 | 8.01E-05 | 8.01E-05 | 7.106    | 7.106   | loose | bbs_cluster |
| 79 | 1.85E-02 | 1.20E-02 | 0        | 0       | loose | bbs_cluster |

|     |          |          |          |          |       |             |
|-----|----------|----------|----------|----------|-------|-------------|
| 80  | 2.49E-02 | 2.43E-02 | 0        | 0        | loose | bbs_cluster |
| 81  | 2.26E-03 | 8.22E-05 | 0        | 10.62    | loose | bbs_cluster |
| 82  | 5.16E-06 | 6.76E-05 | 62.286   | 18.323   | loose | bbs_cluster |
| 83  | 3.34E-03 | 3.34E-03 | 0        | 0        | loose | bbs_cluster |
| 84  | 3.18E-13 | 3.18E-13 | 1813.817 | 1509.925 | loose | bbs_cluster |
| 85  | 4.74E-04 | 7.01E-06 | 6.347    | 83.372   | loose | bbs_cluster |
| 86  | 4.51E-06 | 2.05E-04 | 72.715   | 19.857   | loose | bbs_cluster |
| 87  | 5.40E-08 | 1.79E-08 | 169.92   | 173.738  | loose | bbs_cluster |
| 88  | 2.30E-07 | 3.09E-07 | 156.261  | 210.225  | loose | bbs_cluster |
| 89  | 2.32E-04 | 8.37E-05 | 3.634    | 4.078    | loose | bbs_cluster |
| 90  | 1.14E-06 | 5.69E-06 | 81.695   | 72.526   | loose | bbs_cluster |
| 91  | 1.23E-04 | 4.57E-05 | 31.119   | 59.494   | loose | bbs_cluster |
| 92  | 5.04E-05 | 7.71E-04 | 4.298    | 3.113    | loose | bbs_cluster |
| 93  | 1.95E-06 | 1.95E-06 | 23.809   | 23.31    | loose | bbs_cluster |
| 94  | 1.52E-04 | 1.22E-04 | 6.888    | 6.986    | loose | bbs_cluster |
| 95  | 1.02E-06 | 1.02E-06 | 5.991    | 5.991    | loose | bbs_cluster |
| 96  | 1.94E-03 | 6.68E-03 | 0        | 0        | loose | bbs_cluster |
| 97  | 6.25E-05 | 6.25E-05 | 56.701   | 60.294   | loose | bbs_cluster |
| 98  | 6.52E-13 | 6.52E-13 | 1446.237 | 1308.672 | loose | bbs_cluster |
| 99  | 3.75E-04 | 3.51E-04 | 6.477    | 6.72     | loose | bbs_cluster |
| 100 | 6.24E-03 | 4.86E-03 | 0        | 0        | loose | bbs_cluster |
| 1   | 1.51E-03 | 9.79E-04 | 0        | 3.009    | loose | edge_1_300  |
| 2   | 5.43E-03 | 5.28E-03 | 0        | 0        | loose | edge_1_300  |
| 3   | 3.80E-02 | 1.80E-02 | 0        | 0        | loose | edge_1_300  |
| 4   | 1.85E-03 | 1.85E-03 | 0        | 0        | loose | edge_1_300  |
| 5   | 4.62E-07 | 1.83E-07 | 48.41    | 49.275   | loose | edge_1_300  |
| 6   | 1.02E-13 | 1.02E-13 | 153.847  | 156.878  | loose | edge_1_300  |
| 7   | 5.37E-07 | 4.53E-07 | 119.424  | 143.539  | loose | edge_1_300  |
| 8   | 2.00E-03 | 6.82E-04 | 0        | 6.239    | loose | edge_1_300  |
| 9   | 1.82E-07 | 3.16E-08 | 30.192   | 42.558   | loose | edge_1_300  |
| 10  | 1.04E-02 | 8.80E-03 | 0        | 0        | loose | edge_1_300  |
| 11  | 6.02E-02 | 1.95E-02 | 0        | 0        | loose | edge_1_300  |
| 12  | 3.00E-03 | 3.00E-03 | 0        | 0        | loose | edge_1_300  |
| 13  | 1.06E-05 | 8.59E-06 | 116.901  | 118.274  | loose | edge_1_300  |
| 14  | 2.02E-02 | 2.02E-02 | 0        | 0        | loose | edge_1_300  |
| 15  | 6.95E-03 | 5.86E-03 | 0        | 0        | loose | edge_1_300  |
| 16  | 7.50E-07 | 7.50E-07 | 157.137  | 158.844  | loose | edge_1_300  |
| 17  | 1.67E-01 | 2.66E-02 | 0        | 0        | loose | edge_1_300  |
| 18  | 2.09E-05 | 2.09E-05 | 7.896    | 7.896    | loose | edge_1_300  |
| 19  | 3.63E-06 | 3.63E-06 | 74.655   | 74.655   | loose | edge_1_300  |
| 20  | 8.26E-10 | 5.60E-10 | 36.914   | 39.59    | loose | edge_1_300  |
| 21  | 6.02E-02 | 2.86E-02 | 0        | 0        | loose | edge_1_300  |
| 22  | 3.46E-05 | 3.29E-05 | 29.838   | 34.574   | loose | edge_1_300  |
| 23  | 6.74E-02 | 3.21E-02 | 0        | 0        | loose | edge_1_300  |
| 24  | 9.45E-02 | 1.03E-02 | 0        | 0        | loose | edge_1_300  |
| 25  | 6.27E-09 | 3.79E-10 | 514.162  | 614.591  | loose | edge_1_300  |
| 26  | 1.36E-02 | 5.99E-03 | 0        | 0        | loose | edge_1_300  |
| 27  | 4.55E-02 | 2.15E-02 | 0        | 0        | loose | edge_1_300  |
| 28  | 8.09E-04 | 8.09E-04 | 3.092    | 3.092    | loose | edge_1_300  |



|    |          |          |          |         |       |            |
|----|----------|----------|----------|---------|-------|------------|
| 29 | 7.41E-03 | 7.41E-03 | 0        | 0       | loose | edge_1_300 |
| 30 | 1.50E-06 | 6.56E-07 | 55.904   | 76.464  | loose | edge_1_300 |
| 31 | 5.39E-03 | 4.97E-03 | 0        | 0       | loose | edge_1_300 |
| 32 | 1.15E-02 | 1.25E-03 | 0        | 0       | loose | edge_1_300 |
| 33 | 9.36E-08 | 3.70E-08 | 62.291   | 54.814  | loose | edge_1_300 |
| 34 | 5.76E-02 | 2.56E-02 | 0        | 0       | loose | edge_1_300 |
| 35 | 1.46E-02 | 1.46E-02 | 0        | 0       | loose | edge_1_300 |
| 36 | 5.69E-05 | 7.43E-06 | 4.245    | 5.129   | loose | edge_1_300 |
| 37 | 5.44E-06 | 4.68E-06 | 5.265    | 5.329   | loose | edge_1_300 |
| 38 | 4.60E-04 | 4.60E-04 | 43.86    | 43.86   | loose | edge_1_300 |
| 39 | 3.99E-03 | 3.48E-03 | 0        | 0       | loose | edge_1_300 |
| 40 | 1.83E-06 | 1.57E-06 | 5.738    | 5.804   | loose | edge_1_300 |
| 41 | 3.72E-07 | 1.17E-07 | 59.72    | 64.011  | loose | edge_1_300 |
| 42 | 1.29E-02 | 1.26E-02 | 0        | 0       | loose | edge_1_300 |
| 43 | 1.54E-02 | 7.22E-03 | 0        | 0       | loose | edge_1_300 |
| 44 | 1.07E-03 | 7.32E-04 | 0        | 3.136   | loose | edge_1_300 |
| 45 | 5.26E-09 | 5.26E-09 | 123.565  | 123.565 | loose | edge_1_300 |
| 46 | 4.67E-03 | 3.29E-03 | 0        | 0       | loose | edge_1_300 |
| 47 | 9.91E-05 | 8.96E-05 | 54.244   | 55.03   | loose | edge_1_300 |
| 48 | 6.74E-02 | 3.21E-02 | 0        | 0       | loose | edge_1_300 |
| 49 | 5.28E-02 | 2.45E-02 | 0        | 0       | loose | edge_1_300 |
| 50 | 1.58E-03 | 1.58E-03 | 0        | 0       | loose | edge_1_300 |
| 51 | 3.00E-24 | 3.00E-24 | 5404.418 | 3825.18 | loose | edge_1_300 |
| 52 | 1.84E-11 | 1.24E-11 | 44.101   | 85.302  | loose | edge_1_300 |
| 53 | 9.82E-03 | 6.95E-03 | 0        | 0       | loose | edge_1_300 |
| 54 | 7.10E-08 | 1.85E-08 | 594.536  | 678.437 | loose | edge_1_300 |
| 55 | 5.10E-03 | 5.10E-03 | 0        | 0       | loose | edge_1_300 |
| 56 | 1.99E-02 | 1.16E-02 | 0        | 0       | loose | edge_1_300 |
| 57 | 3.61E-05 | 9.97E-05 | 217.928  | 113.261 | loose | edge_1_300 |
| 58 | 2.96E-07 | 2.96E-07 | 655.413  | 665.313 | loose | edge_1_300 |
| 59 | 7.67E-06 | 7.28E-06 | 5.115    | 5.138   | loose | edge_1_300 |
| 60 | 1.04E-08 | 1.04E-08 | 118.809  | 118.809 | loose | edge_1_300 |
| 61 | 2.48E-03 | 1.97E-03 | 0        | 0       | loose | edge_1_300 |
| 62 | 1.56E-02 | 1.01E-02 | 0        | 0       | loose | edge_1_300 |
| 63 | 1.62E-02 | 4.04E-03 | 0        | 0       | loose | edge_1_300 |
| 64 | 8.07E-13 | 8.07E-13 | 308.581  | 311.11  | loose | edge_1_300 |
| 65 | 6.81E-06 | 6.81E-06 | 139.759  | 145.615 | loose | edge_1_300 |
| 66 | 2.98E-03 | 2.98E-03 | 0        | 0       | loose | edge_1_300 |
| 67 | 1.54E-02 | 7.22E-03 | 0        | 0       | loose | edge_1_300 |
| 68 | 5.28E-02 | 2.51E-02 | 0        | 0       | loose | edge_1_300 |
| 69 | 6.29E-05 | 6.29E-05 | 103.52   | 104.853 | loose | edge_1_300 |
| 70 | 3.05E-02 | 1.44E-02 | 0        | 0       | loose | edge_1_300 |
| 71 | 4.37E-07 | 3.58E-07 | 107.831  | 118.062 | loose | edge_1_300 |
| 72 | 2.94E-10 | 2.94E-10 | 139.658  | 139.658 | loose | edge_1_300 |
| 73 | 7.24E-03 | 2.48E-03 | 0        | 0       | loose | edge_1_300 |
| 74 | 2.64E-03 | 1.94E-03 | 0        | 0       | loose | edge_1_300 |
| 75 | 2.87E-04 | 1.46E-04 | 3.543    | 27.312  | loose | edge_1_300 |
| 76 | 4.55E-02 | 2.15E-02 | 0        | 0       | loose | edge_1_300 |
| 77 | 3.05E-02 | 1.44E-02 | 0        | 0       | loose | edge_1_300 |

|     |          |          |           |          |       |            |
|-----|----------|----------|-----------|----------|-------|------------|
| 78  | 3.27E-03 | 2.48E-03 | 0         | 0        | loose | edge_1_300 |
| 79  | 3.80E-02 | 1.80E-02 | 0         | 0        | loose | edge_1_300 |
| 80  | 6.02E-02 | 2.86E-02 | 0         | 0        | loose | edge_1_300 |
| 81  | 5.62E-04 | 3.08E-03 | 3.25      | 0        | loose | edge_1_300 |
| 82  | 4.48E-09 | 4.01E-09 | 209.315   | 315.175  | loose | edge_1_300 |
| 83  | 3.05E-02 | 1.44E-02 | 0         | 0        | loose | edge_1_300 |
| 84  | 4.60E-04 | 4.60E-04 | 9.435     | 9.435    | loose | edge_1_300 |
| 85  | 6.02E-02 | 2.86E-02 | 0         | 0        | loose | edge_1_300 |
| 86  | 6.29E-04 | 2.74E-04 | 3.202     | 3.562    | loose | edge_1_300 |
| 87  | 1.04E-09 | 9.31E-10 | 224.45    | 231.742  | loose | edge_1_300 |
| 88  | 4.50E-03 | 1.04E-03 | 0         | 0        | loose | edge_1_300 |
| 89  | 6.91E-07 | 1.73E-07 | 37.717    | 38.573   | loose | edge_1_300 |
| 90  | 6.04E-02 | 3.43E-02 | 0         | 0        | loose | edge_1_300 |
| 91  | 3.96E-03 | 3.96E-03 | 0         | 0        | loose | edge_1_300 |
| 92  | 1.00E-04 | 2.24E-05 | 26.678    | 31.417   | loose | edge_1_300 |
| 93  | 7.05E-02 | 9.60E-03 | 0         | 0        | loose | edge_1_300 |
| 94  | 8.91E-04 | 5.13E-04 | 15.208    | 33.926   | loose | edge_1_300 |
| 95  | 2.21E-02 | 2.14E-02 | 0         | 0        | loose | edge_1_300 |
| 96  | 6.52E-04 | 2.11E-04 | 21.727    | 41.893   | loose | edge_1_300 |
| 97  | 3.99E-03 | 3.48E-03 | 0         | 0        | loose | edge_1_300 |
| 98  | 4.69E-03 | 4.69E-03 | 0         | 0        | loose | edge_1_300 |
| 99  | 8.75E-03 | 8.33E-03 | 0         | 0        | loose | edge_1_300 |
| 100 | 4.15E-03 | 2.31E-04 | 0         | 3.636    | loose | edge_1_300 |
| 1   | 4.96E-08 | 3.71E-08 | 106.171   | 107.563  | loose | gfr        |
| 2   | 3.92E-04 | 3.92E-04 | 3.407     | 6.608    | loose | gfr        |
| 3   | 3.20E-06 | 2.71E-06 | 120.306   | 122.191  | loose | gfr        |
| 4   | 5.22E-20 | 5.22E-20 | 3285.237  | 2766.554 | loose | gfr        |
| 5   | 8.89E-02 | 4.26E-02 | 0         | 0        | loose | gfr        |
| 6   | 3.77E-07 | 2.74E-07 | 159.019   | 161.319  | loose | gfr        |
| 7   | 2.70E-08 | 1.25E-08 | 34.339    | 25.246   | loose | gfr        |
| 8   | 1.28E-05 | 1.15E-05 | 92.538    | 103.047  | loose | gfr        |
| 9   | 1.61E-11 | 1.37E-11 | 10.794    | 10.863   | loose | gfr        |
| 10  | 5.14E-06 | 5.14E-06 | 232.3     | 242.923  | loose | gfr        |
| 11  | 9.29E-04 | 9.29E-04 | 6.064     | 6.064    | loose | gfr        |
| 12  | 5.85E-06 | 4.79E-05 | 22.747    | 10.365   | loose | gfr        |
| 13  | 1.82E-14 | 4.78E-11 | 2121.314  | 1465.402 | loose | gfr        |
| 14  | 4.73E-06 | 4.73E-06 | 139.443   | 141.191  | loose | gfr        |
| 15  | 3.03E-04 | 3.03E-04 | 6.652     | 9.88     | loose | gfr        |
| 16  | 5.45E-57 | 5.45E-57 | 10080.235 | 7958.513 | loose | gfr        |
| 17  | 7.55E-07 | 1.11E-07 | 57.771    | 52.835   | loose | gfr        |
| 18  | 3.68E-03 | 3.53E-03 | 0         | 0        | loose | gfr        |
| 19  | 1.02E-13 | 1.02E-13 | 1917.536  | 1649.332 | loose | gfr        |
| 20  | 2.71E-14 | 1.77E-14 | 212.515   | 215.341  | loose | gfr        |
| 21  | 2.82E-18 | 2.41E-18 | 489.969   | 494.935  | loose | gfr        |
| 22  | 3.53E-03 | 1.68E-04 | 0         | 7.112    | loose | gfr        |
| 23  | 4.49E-03 | 4.49E-03 | 0         | 0        | loose | gfr        |
| 24  | 7.79E-05 | 1.59E-04 | 36.545    | 33.471   | loose | gfr        |
| 25  | 4.47E-04 | 4.25E-04 | 3.35      | 3.371    | loose | gfr        |
| 26  | 6.23E-06 | 5.81E-06 | 121.166   | 126.405  | loose | gfr        |

|    |          |          |         |         |       |     |
|----|----------|----------|---------|---------|-------|-----|
| 27 | 4.46E-06 | 3.76E-06 | 285.651 | 267.307 | loose | gfr |
| 28 | 1.59E-07 | 1.59E-07 | 578.567 | 505.342 | loose | gfr |
| 29 | 1.31E-04 | 1.07E-04 | 40.44   | 60.126  | loose | gfr |
| 30 | 1.22E-02 | 1.07E-02 | 0       | 0       | loose | gfr |
| 31 | 2.04E-02 | 2.04E-02 | 0       | 0       | loose | gfr |
| 32 | 1.65E-04 | 1.65E-04 | 3.782   | 3.782   | loose | gfr |
| 33 | 2.55E-10 | 2.55E-10 | 139.839 | 139.839 | loose | gfr |
| 34 | 8.86E-06 | 8.86E-06 | 521.435 | 438.954 | loose | gfr |
| 35 | 3.05E-02 | 3.63E-03 | 0       | 0       | loose | gfr |
| 36 | 5.25E-03 | 5.25E-03 | 0       | 0       | loose | gfr |
| 37 | 1.76E-03 | 2.64E-04 | 0       | 6.865   | loose | gfr |
| 38 | 2.49E-03 | 1.74E-03 | 0       | 0       | loose | gfr |
| 39 | 6.74E-02 | 3.21E-02 | 0       | 0       | loose | gfr |
| 40 | 1.99E-03 | 7.63E-03 | 0       | 0       | loose | gfr |
| 41 | 4.25E-05 | 3.17E-05 | 152.372 | 173.635 | loose | gfr |
| 42 | 1.27E-04 | 1.27E-04 | 3.896   | 3.896   | loose | gfr |
| 43 | 2.82E-07 | 2.82E-07 | 770.869 | 576.152 | loose | gfr |
| 44 | 2.64E-02 | 8.55E-03 | 0       | 0       | loose | gfr |
| 45 | 1.86E-04 | 1.31E-04 | 42.405  | 42.159  | loose | gfr |
| 46 | 7.49E-07 | 7.49E-07 | 430.299 | 351.053 | loose | gfr |
| 47 | 5.59E-05 | 5.59E-05 | 203.548 | 220.655 | loose | gfr |
| 48 | 5.86E-05 | 7.83E-05 | 184.997 | 160.697 | loose | gfr |
| 49 | 1.04E-09 | 9.31E-10 | 197.771 | 200.325 | loose | gfr |
| 50 | 2.81E-07 | 1.60E-07 | 463.153 | 398.391 | loose | gfr |
| 51 | 3.85E-02 | 3.85E-02 | 0       | 0       | loose | gfr |
| 52 | 0.00E+00 | 0.00E+00 | 112.878 | 112.878 | loose | gfr |
| 53 | 4.86E-04 | 8.11E-04 | 15.902  | 3.091   | loose | gfr |
| 54 | 2.01E-11 | 2.01E-11 | 41.994  | 42.192  | loose | gfr |
| 55 | 5.67E-04 | 1.45E-03 | 3.247   | 0       | loose | gfr |
| 56 | 2.10E-04 | 2.10E-04 | 3.678   | 3.678   | loose | gfr |
| 57 | 4.45E-05 | 3.64E-05 | 7.36    | 13.709  | loose | gfr |
| 58 | 5.81E-04 | 4.83E-04 | 15.582  | 18.756  | loose | gfr |
| 59 | 7.64E-03 | 2.35E-03 | 0       | 0       | loose | gfr |
| 60 | 3.84E-04 | 3.33E-04 | 6.456   | 6.518   | loose | gfr |
| 61 | 1.53E-05 | 1.53E-05 | 30.053  | 8.586   | loose | gfr |
| 62 | 4.08E-03 | 4.08E-03 | 0       | 0       | loose | gfr |
| 63 | 5.28E-02 | 2.51E-02 | 0       | 0       | loose | gfr |
| 64 | 8.92E-04 | 8.92E-04 | 9.086   | 12.114  | loose | gfr |
| 65 | 5.28E-03 | 5.10E-03 | 0       | 0       | loose | gfr |
| 66 | 6.07E-03 | 3.98E-03 | 0       | 0       | loose | gfr |
| 67 | 1.81E-03 | 1.45E-03 | 0       | 0       | loose | gfr |
| 68 | 9.11E-04 | 9.11E-04 | 3.04    | 3.04    | loose | gfr |
| 69 | 3.37E-03 | 3.37E-03 | 0       | 0       | loose | gfr |
| 70 | 3.11E-03 | 3.11E-03 | 0       | 0       | loose | gfr |
| 71 | 5.83E-06 | 8.76E-07 | 41.877  | 50.581  | loose | gfr |
| 72 | 4.55E-02 | 2.15E-02 | 0       | 0       | loose | gfr |
| 73 | 2.45E-07 | 2.45E-07 | 96.985  | 96.985  | loose | gfr |
| 74 | 1.41E-13 | 1.41E-13 | 253.118 | 259.475 | loose | gfr |
| 75 | 2.10E-08 | 1.80E-08 | 7.679   | 7.745   | loose | gfr |

|     |          |          |          |          |       |     |
|-----|----------|----------|----------|----------|-------|-----|
| 76  | 5.69E-07 | 1.42E-07 | 218.54   | 275.402  | loose | gfr |
| 77  | 2.25E-04 | 2.25E-04 | 20.369   | 20.468   | loose | gfr |
| 78  | 1.40E-02 | 3.63E-03 | 0        | 0        | loose | gfr |
| 79  | 9.90E-08 | 9.90E-08 | 1536.907 | 1153.897 | loose | gfr |
| 80  | 3.72E-03 | 1.25E-03 | 0        | 0        | loose | gfr |
| 81  | 2.88E-03 | 3.69E-04 | 0        | 3.433    | loose | gfr |
| 82  | 1.37E-35 | 1.37E-35 | 459.197  | 459.197  | loose | gfr |
| 83  | 7.80E-06 | 7.80E-06 | 52.712   | 94.182   | loose | gfr |
| 84  | 4.55E-02 | 1.43E-02 | 0        | 0        | loose | gfr |
| 85  | 1.41E-03 | 1.32E-03 | 0        | 0        | loose | gfr |
| 86  | 9.14E-02 | 4.49E-03 | 0        | 0        | loose | gfr |
| 87  | 6.13E-03 | 6.30E-03 | 0        | 0        | loose | gfr |
| 88  | 3.23E-02 | 1.68E-02 | 0        | 0        | loose | gfr |
| 89  | 1.87E-03 | 1.87E-03 | 0        | 0        | loose | gfr |
| 90  | 1.84E-03 | 1.17E-03 | 0        | 0        | loose | gfr |
| 91  | 1.12E-11 | 1.12E-11 | 344.065  | 536.911  | loose | gfr |
| 92  | 4.61E-07 | 4.05E-07 | 50.586   | 51.429   | loose | gfr |
| 93  | 9.36E-06 | 9.36E-06 | 183.12   | 170.823  | loose | gfr |
| 94  | 8.36E-03 | 8.10E-03 | 0        | 0        | loose | gfr |
| 95  | 1.56E-02 | 1.34E-02 | 0        | 0        | loose | gfr |
| 96  | 4.59E-04 | 3.28E-04 | 6.566    | 38.098   | loose | gfr |
| 97  | 3.48E-05 | 2.21E-05 | 67.274   | 50.795   | loose | gfr |
| 98  | 6.94E-05 | 5.19E-05 | 32.303   | 32.461   | loose | gfr |
| 99  | 5.11E-04 | 5.11E-04 | 12.447   | 12.447   | loose | gfr |
| 100 | 3.98E-25 | 3.98E-25 | 363.653  | 363.653  | loose | gfr |
| 1   | 5.28E-02 | 2.51E-02 | 0        | 0        | loose | pcs |
| 2   | 3.31E-06 | 3.31E-06 | 431.769  | 483.701  | loose | pcs |
| 3   | 2.03E-02 | 7.52E-03 | 0        | 0        | loose | pcs |
| 4   | 1.97E-04 | 1.57E-04 | 10.562   | 3.804    | loose | pcs |
| 5   | 9.94E-03 | 3.42E-03 | 0        | 0        | loose | pcs |
| 6   | 4.71E-04 | 1.41E-04 | 59.521   | 127.198  | loose | pcs |
| 7   | 9.97E-05 | 9.97E-05 | 105.069  | 106.388  | loose | pcs |
| 8   | 1.61E-03 | 1.26E-03 | 0        | 0        | loose | pcs |
| 9   | 1.08E-03 | 3.45E-04 | 0        | 3.462    | loose | pcs |
| 10  | 3.04E-03 | 2.57E-03 | 0        | 0        | loose | pcs |
| 11  | 3.04E-03 | 1.94E-03 | 0        | 0        | loose | pcs |
| 12  | 4.38E-03 | 3.98E-04 | 0        | 3.4      | loose | pcs |
| 13  | 1.12E-04 | 8.88E-05 | 25.503   | 28.817   | loose | pcs |
| 14  | 4.74E-03 | 5.16E-04 | 0        | 3.287    | loose | pcs |
| 15  | 7.87E-05 | 7.87E-05 | 11.123   | 11.246   | loose | pcs |
| 16  | 3.69E-08 | 3.27E-08 | 7.433    | 7.485    | loose | pcs |
| 17  | 3.44E-06 | 3.44E-06 | 5.464    | 5.464    | loose | pcs |
| 18  | 3.05E-02 | 1.44E-02 | 0        | 0        | loose | pcs |
| 19  | 5.38E-04 | 5.11E-04 | 15.977   | 22.334   | loose | pcs |
| 20  | 8.09E-04 | 5.65E-04 | 3.092    | 3.248    | loose | pcs |
| 21  | 1.55E-02 | 6.96E-03 | 0        | 0        | loose | pcs |
| 22  | 1.81E-07 | 8.91E-08 | 112.021  | 86.303   | loose | pcs |
| 23  | 9.14E-12 | 9.14E-12 | 163.346  | 163.346  | loose | pcs |
| 24  | 3.80E-02 | 1.80E-02 | 0        | 0        | loose | pcs |

|    |          |          |         |         |       |     |
|----|----------|----------|---------|---------|-------|-----|
| 25 | 4.55E-02 | 2.15E-02 | 0       | 0       | loose | pcs |
| 26 | 6.02E-02 | 2.86E-02 | 0       | 0       | loose | pcs |
| 27 | 2.24E-03 | 2.24E-03 | 0       | 0       | loose | pcs |
| 28 | 1.45E-02 | 1.45E-02 | 0       | 0       | loose | pcs |
| 29 | 3.80E-02 | 1.80E-02 | 0       | 0       | loose | pcs |
| 30 | 5.65E-04 | 5.65E-04 | 3.248   | 3.248   | loose | pcs |
| 31 | 2.78E-03 | 2.60E-03 | 0       | 0       | loose | pcs |
| 32 | 7.46E-02 | 3.56E-02 | 0       | 0       | loose | pcs |
| 33 | 1.61E-02 | 1.33E-02 | 0       | 0       | loose | pcs |
| 34 | 3.04E-03 | 2.57E-03 | 0       | 0       | loose | pcs |
| 35 | 3.04E-03 | 1.94E-03 | 0       | 0       | loose | pcs |
| 36 | 8.57E-04 | 1.41E-04 | 3.067   | 20.301  | loose | pcs |
| 37 | 2.78E-03 | 2.78E-03 | 0       | 0       | loose | pcs |
| 38 | 4.19E-02 | 1.82E-02 | 0       | 0       | loose | pcs |
| 39 | 8.69E-02 | 4.17E-02 | 0       | 0       | loose | pcs |
| 40 | 1.10E-05 | 1.10E-05 | 562.299 | 452.813 | loose | pcs |
| 41 | 8.42E-04 | 8.42E-04 | 3.075   | 3.075   | loose | pcs |
| 42 | 1.95E-04 | 1.95E-04 | 13.942  | 7.172   | loose | pcs |
| 43 | 1.08E-03 | 1.08E-03 | 0       | 0       | loose | pcs |
| 44 | 2.22E-05 | 1.32E-03 | 14.47   | 0       | loose | pcs |
| 45 | 6.47E-03 | 3.74E-04 | 0       | 3.427   | loose | pcs |
| 46 | 1.59E-03 | 1.59E-03 | 0       | 0       | loose | pcs |
| 47 | 3.74E-02 | 1.56E-02 | 0       | 0       | loose | pcs |
| 48 | 2.42E-03 | 1.77E-04 | 0       | 3.753   | loose | pcs |
| 49 | 4.68E-06 | 4.41E-06 | 25.061  | 12.551  | loose | pcs |
| 50 | 5.78E-04 | 5.78E-04 | 3.238   | 12.352  | loose | pcs |
| 51 | 6.49E-04 | 5.13E-04 | 18.375  | 15.448  | loose | pcs |
| 52 | 1.23E-03 | 9.37E-04 | 0       | 3.029   | loose | pcs |
| 53 | 9.91E-05 | 8.96E-05 | 54.244  | 55.03   | loose | pcs |
| 54 | 3.78E-02 | 3.52E-03 | 0       | 0       | loose | pcs |
| 55 | 2.32E-03 | 1.44E-02 | 0       | 0       | loose | pcs |
| 56 | 1.66E-06 | 2.46E-07 | 43.034  | 43.123  | loose | pcs |
| 57 | 2.69E-03 | 2.38E-03 | 0       | 0       | loose | pcs |
| 58 | 6.27E-03 | 6.04E-03 | 0       | 0       | loose | pcs |
| 59 | 3.66E-03 | 3.66E-03 | 0       | 0       | loose | pcs |
| 60 | 9.94E-03 | 3.42E-03 | 0       | 0       | loose | pcs |
| 61 | 7.46E-02 | 2.99E-03 | 0       | 0       | loose | pcs |
| 62 | 5.28E-02 | 2.51E-02 | 0       | 0       | loose | pcs |
| 63 | 3.80E-02 | 1.80E-02 | 0       | 0       | loose | pcs |
| 64 | 2.14E-03 | 1.01E-02 | 0       | 0       | loose | pcs |
| 65 | 1.21E-03 | 1.02E-03 | 0       | 0       | loose | pcs |
| 66 | 5.38E-03 | 3.49E-03 | 0       | 0       | loose | pcs |
| 67 | 1.10E-05 | 1.10E-05 | 4.959   | 8.031   | loose | pcs |
| 68 | 1.70E-04 | 1.28E-04 | 7.027   | 7.184   | loose | pcs |
| 69 | 2.71E-04 | 2.71E-04 | 3.568   | 3.568   | loose | pcs |
| 70 | 1.01E-04 | 7.62E-07 | 7.89    | 14.008  | loose | pcs |
| 71 | 5.82E-03 | 2.57E-03 | 0       | 0       | loose | pcs |
| 72 | 2.28E-06 | 2.50E-05 | 75.479  | 31.12   | loose | pcs |
| 73 | 6.19E-07 | 6.19E-07 | 156.748 | 122.691 | loose | pcs |

|     |          |          |          |          |        |             |
|-----|----------|----------|----------|----------|--------|-------------|
| 74  | 3.18E-06 | 2.69E-06 | 239.208  | 194.636  | loose  | pcs         |
| 75  | 3.66E-05 | 3.93E-05 | 58.552   | 31.341   | loose  | pcs         |
| 76  | 3.24E-07 | 3.24E-07 | 181.631  | 183.465  | loose  | pcs         |
| 77  | 5.19E-06 | 4.27E-06 | 76.194   | 77.466   | loose  | pcs         |
| 78  | 7.39E-05 | 9.04E-04 | 20.982   | 6.045    | loose  | pcs         |
| 79  | 4.55E-02 | 2.15E-02 | 0        | 0        | loose  | pcs         |
| 80  | 6.02E-02 | 2.86E-02 | 0        | 0        | loose  | pcs         |
| 81  | 4.04E-03 | 4.04E-03 | 0        | 0        | loose  | pcs         |
| 82  | 1.98E-05 | 1.47E-04 | 68.61    | 24.295   | loose  | pcs         |
| 83  | 2.00E-03 | 1.94E-03 | 0        | 0        | loose  | pcs         |
| 84  | 6.23E-03 | 3.99E-03 | 0        | 0        | loose  | pcs         |
| 85  | 4.55E-02 | 2.15E-02 | 0        | 0        | loose  | pcs         |
| 86  | 5.69E-04 | 5.69E-04 | 3.245    | 3.245    | loose  | pcs         |
| 87  | 2.66E-03 | 2.66E-03 | 0        | 0        | loose  | pcs         |
| 88  | 1.49E-06 | 1.49E-06 | 143.376  | 145.039  | loose  | pcs         |
| 89  | 5.62E-03 | 3.01E-04 | 0        | 3.521    | loose  | pcs         |
| 90  | 8.59E-03 | 3.81E-03 | 0        | 0        | loose  | pcs         |
| 91  | 9.07E-03 | 6.52E-04 | 0        | 3.186    | loose  | pcs         |
| 92  | 1.46E-04 | 1.46E-04 | 19.898   | 20.05    | loose  | pcs         |
| 93  | 1.90E-06 | 1.52E-06 | 423.979  | 363.544  | loose  | pcs         |
| 94  | 4.27E-03 | 4.13E-03 | 0        | 0        | loose  | pcs         |
| 95  | 1.33E-03 | 1.26E-03 | 0        | 0        | loose  | pcs         |
| 96  | 4.56E-02 | 1.79E-02 | 0        | 0        | loose  | pcs         |
| 97  | 4.42E-04 | 4.42E-04 | 3.355    | 3.355    | loose  | pcs         |
| 98  | 1.03E-03 | 3.35E-04 | 0        | 23.475   | loose  | pcs         |
| 99  | 1.04E-09 | 9.31E-10 | 197.771  | 200.325  | loose  | pcs         |
| 100 | 3.00E-11 | 3.00E-11 | 152.986  | 152.986  | loose  | pcs         |
| 1   | 1.63E-07 | 1.63E-07 | 40.158   | 26.085   | strict | bbs_cluster |
| 2   | 5.68E-03 | 5.39E-03 | 0        | 0        | strict | bbs_cluster |
| 3   | 2.39E-02 | 5.44E-03 | 0        | 0        | strict | bbs_cluster |
| 4   | 2.25E-07 | 8.76E-08 | 42.77    | 47.147   | strict | bbs_cluster |
| 5   | 2.30E-09 | 7.50E-10 | 57.386   | 62.681   | strict | bbs_cluster |
| 6   | 1.06E-05 | 1.06E-05 | 28.019   | 28.392   | strict | bbs_cluster |
| 7   | 2.42E-12 | 1.88E-12 | 102.914  | 103.682  | strict | bbs_cluster |
| 8   | 1.02E-08 | 6.77E-09 | 157.159  | 185.332  | strict | bbs_cluster |
| 9   | 1.00E-02 | 8.70E-04 | 0        | 3.06     | strict | bbs_cluster |
| 10  | 3.80E-02 | 2.03E-02 | 0        | 0        | strict | bbs_cluster |
| 11  | 7.46E-02 | 4.03E-02 | 0        | 0        | strict | bbs_cluster |
| 12  | 9.10E-13 | 9.10E-13 | 2472.814 | 2244.547 | strict | bbs_cluster |
| 13  | 1.16E-07 | 8.44E-08 | 78.267   | 78.822   | strict | bbs_cluster |
| 14  | 3.51E-10 | 2.61E-10 | 1227.724 | 1138.746 | strict | bbs_cluster |
| 15  | 5.43E-07 | 3.65E-07 | 17.351   | 18.721   | strict | bbs_cluster |
| 16  | 3.94E-03 | 1.46E-04 | 0        | 9.988    | strict | bbs_cluster |
| 17  | 1.81E-04 | 1.81E-04 | 3.743    | 3.743    | strict | bbs_cluster |
| 18  | 4.49E-06 | 4.49E-06 | 61.461   | 61.461   | strict | bbs_cluster |
| 19  | 6.41E-05 | 6.41E-05 | 14.411   | 17.463   | strict | bbs_cluster |
| 20  | 3.01E-04 | 1.67E-05 | 3.521    | 14.863   | strict | bbs_cluster |
| 21  | 1.91E-02 | 1.91E-02 | 0        | 0        | strict | bbs_cluster |
| 22  | 9.22E-06 | 7.03E-06 | 55.06    | 73.185   | strict | bbs_cluster |

|    |          |          |         |          |        |             |
|----|----------|----------|---------|----------|--------|-------------|
| 23 | 3.48E-04 | 2.29E-04 | 9.787   | 26.483   | strict | bbs_cluster |
| 24 | 1.16E-03 | 1.52E-04 | 0       | 6.854    | strict | bbs_cluster |
| 25 | 6.28E-04 | 2.20E-06 | 6.296   | 58.859   | strict | bbs_cluster |
| 26 | 1.55E-06 | 1.10E-06 | 522.417 | 474.241  | strict | bbs_cluster |
| 27 | 3.20E-03 | 1.57E-04 | 0       | 11.168   | strict | bbs_cluster |
| 28 | 1.35E-06 | 1.21E-06 | 9.858   | 10.005   | strict | bbs_cluster |
| 29 | 1.38E-03 | 5.44E-03 | 0       | 0        | strict | bbs_cluster |
| 30 | 1.87E-05 | 1.87E-05 | 274.39  | 279.657  | strict | bbs_cluster |
| 31 | 1.69E-02 | 1.29E-02 | 0       | 0        | strict | bbs_cluster |
| 32 | 4.58E-02 | 1.61E-02 | 0       | 0        | strict | bbs_cluster |
| 33 | 2.42E-03 | 1.61E-03 | 0       | 0        | strict | bbs_cluster |
| 34 | 3.83E-04 | 3.83E-04 | 6.723   | 6.723    | strict | bbs_cluster |
| 35 | 2.54E-08 | 2.54E-08 | 48.978  | 48.978   | strict | bbs_cluster |
| 36 | 1.01E-03 | 1.51E-03 | 0       | 0        | strict | bbs_cluster |
| 37 | 1.10E-04 | 9.96E-05 | 15.08   | 15.31    | strict | bbs_cluster |
| 38 | 3.52E-05 | 1.81E-04 | 14.817  | 10.323   | strict | bbs_cluster |
| 39 | 4.84E-03 | 4.84E-03 | 0       | 0        | strict | bbs_cluster |
| 40 | 9.57E-06 | 9.57E-06 | 51.668  | 51.668   | strict | bbs_cluster |
| 41 | 1.74E-02 | 2.74E-03 | 0       | 0        | strict | bbs_cluster |
| 42 | 8.11E-04 | 2.92E-05 | 3.091   | 39.406   | strict | bbs_cluster |
| 43 | 4.13E-04 | 3.04E-04 | 6.685   | 6.902    | strict | bbs_cluster |
| 44 | 2.22E-04 | 2.22E-04 | 3.654   | 3.654    | strict | bbs_cluster |
| 45 | 4.74E-16 | 2.35E-16 | 249.147 | 254.963  | strict | bbs_cluster |
| 46 | 3.87E-03 | 3.36E-03 | 0       | 0        | strict | bbs_cluster |
| 47 | 1.60E-02 | 3.34E-03 | 0       | 0        | strict | bbs_cluster |
| 48 | 8.18E-02 | 4.42E-02 | 0       | 0        | strict | bbs_cluster |
| 49 | 1.43E-04 | 6.38E-06 | 17.377  | 38.069   | strict | bbs_cluster |
| 50 | 8.72E-05 | 8.72E-05 | 7.351   | 7.351    | strict | bbs_cluster |
| 51 | 9.08E-05 | 1.01E-04 | 7.208   | 10.357   | strict | bbs_cluster |
| 52 | 1.77E-03 | 1.58E-04 | 0       | 3.803    | strict | bbs_cluster |
| 53 | 1.17E-06 | 1.17E-06 | 58.036  | 63.467   | strict | bbs_cluster |
| 54 | 1.00E-05 | 4.13E-06 | 229.232 | 302.318  | strict | bbs_cluster |
| 55 | 4.99E-04 | 1.01E-04 | 6.477   | 16.886   | strict | bbs_cluster |
| 56 | 2.93E-13 | 2.93E-13 | 191.63  | 193.774  | strict | bbs_cluster |
| 57 | 3.51E-03 | 1.87E-03 | 0       | 0        | strict | bbs_cluster |
| 58 | 2.89E-06 | 2.89E-06 | 47.619  | 60.964   | strict | bbs_cluster |
| 59 | 1.13E-03 | 1.05E-03 | 0       | 0        | strict | bbs_cluster |
| 60 | 1.16E-05 | 8.39E-06 | 74.84   | 82.557   | strict | bbs_cluster |
| 61 | 1.45E-03 | 1.03E-04 | 0       | 10.875   | strict | bbs_cluster |
| 62 | 1.15E-03 | 3.96E-04 | 0       | 3.402    | strict | bbs_cluster |
| 63 | 1.23E-10 | 1.23E-10 | 1193.36 | 1071.108 | strict | bbs_cluster |
| 64 | 3.10E-08 | 3.10E-08 | 62.18   | 62.18    | strict | bbs_cluster |
| 65 | 2.01E-03 | 2.01E-03 | 0       | 0        | strict | bbs_cluster |
| 66 | 7.85E-05 | 7.85E-05 | 14.572  | 14.572   | strict | bbs_cluster |
| 67 | 1.05E-02 | 1.89E-03 | 0       | 0        | strict | bbs_cluster |
| 68 | 7.62E-09 | 7.62E-09 | 173.979 | 178.306  | strict | bbs_cluster |
| 69 | 3.19E-08 | 3.19E-08 | 111.227 | 112.014  | strict | bbs_cluster |
| 70 | 4.13E-03 | 3.99E-03 | 0       | 0        | strict | bbs_cluster |
| 71 | 1.41E-04 | 7.13E-05 | 16.958  | 16.726   | strict | bbs_cluster |

|     |          |          |          |          |        |             |
|-----|----------|----------|----------|----------|--------|-------------|
| 72  | 1.81E-06 | 1.56E-06 | 10.112   | 36.621   | strict | bbs_cluster |
| 73  | 3.71E-08 | 3.71E-08 | 77.41    | 79.585   | strict | bbs_cluster |
| 74  | 7.34E-09 | 3.48E-09 | 348.572  | 427.54   | strict | bbs_cluster |
| 75  | 1.42E-04 | 1.35E-05 | 23.417   | 43.136   | strict | bbs_cluster |
| 76  | 3.74E-04 | 1.03E-03 | 6.839    | 0        | strict | bbs_cluster |
| 77  | 2.02E-02 | 1.82E-02 | 0        | 0        | strict | bbs_cluster |
| 78  | 1.21E-04 | 1.21E-04 | 13.629   | 13.645   | strict | bbs_cluster |
| 79  | 1.01E-02 | 6.79E-03 | 0        | 0        | strict | bbs_cluster |
| 80  | 1.10E-01 | 5.99E-02 | 0        | 0        | strict | bbs_cluster |
| 81  | 1.22E-03 | 1.22E-03 | 0        | 0        | strict | bbs_cluster |
| 82  | 5.32E-07 | 5.32E-07 | 74.879   | 69.626   | strict | bbs_cluster |
| 83  | 6.73E-04 | 4.75E-04 | 3.172    | 15.885   | strict | bbs_cluster |
| 84  | 2.84E-15 | 1.91E-15 | 1860.402 | 1691.467 | strict | bbs_cluster |
| 85  | 9.24E-04 | 1.50E-05 | 3.034    | 56.492   | strict | bbs_cluster |
| 86  | 4.98E-08 | 1.27E-04 | 67.343   | 30.196   | strict | bbs_cluster |
| 87  | 1.68E-11 | 1.68E-11 | 102.208  | 103.919  | strict | bbs_cluster |
| 88  | 1.49E-06 | 1.49E-06 | 102.1    | 99.973   | strict | bbs_cluster |
| 89  | 6.00E-05 | 3.12E-05 | 7.229    | 7.514    | strict | bbs_cluster |
| 90  | 1.81E-06 | 1.81E-06 | 51.171   | 47.485   | strict | bbs_cluster |
| 91  | 2.34E-05 | 2.34E-05 | 22.332   | 29.325   | strict | bbs_cluster |
| 92  | 2.07E-04 | 4.30E-04 | 3.685    | 6.443    | strict | bbs_cluster |
| 93  | 7.90E-06 | 7.90E-06 | 12.357   | 32.897   | strict | bbs_cluster |
| 94  | 1.61E-02 | 1.61E-02 | 0        | 0        | strict | bbs_cluster |
| 95  | 4.20E-06 | 4.20E-06 | 12.315   | 12.406   | strict | bbs_cluster |
| 96  | 4.40E-03 | 2.62E-03 | 0        | 0        | strict | bbs_cluster |
| 97  | 6.25E-05 | 6.25E-05 | 42.864   | 42.864   | strict | bbs_cluster |
| 98  | 3.72E-12 | 3.72E-12 | 1862.58  | 1781.229 | strict | bbs_cluster |
| 99  | 3.75E-04 | 3.28E-04 | 6.825    | 6.94     | strict | bbs_cluster |
| 100 | 5.16E-04 | 4.06E-04 | 3.287    | 3.392    | strict | bbs_cluster |
| 1   | 8.65E-03 | 3.61E-02 | 0        | 0        | strict | edge_1_300  |
| 2   | 5.28E-02 | 2.84E-02 | 0        | 0        | strict | edge_1_300  |
| 3   | 3.80E-02 | 2.03E-02 | 0        | 0        | strict | edge_1_300  |
| 4   | 3.35E-03 | 2.24E-03 | 0        | 0        | strict | edge_1_300  |
| 5   | 2.40E-07 | 1.27E-07 | 60.669   | 63.457   | strict | edge_1_300  |
| 6   | 1.02E-13 | 1.02E-13 | 100.767  | 100.767  | strict | edge_1_300  |
| 7   | 1.64E-07 | 1.32E-07 | 87.29    | 88.156   | strict | edge_1_300  |
| 8   | 2.64E-03 | 4.04E-04 | 0        | 12.946   | strict | edge_1_300  |
| 9   | 5.24E-07 | 6.56E-09 | 10.472   | 22.187   | strict | edge_1_300  |
| 10  | 1.36E-02 | 9.76E-03 | 0        | 0        | strict | edge_1_300  |
| 11  | 6.02E-02 | 3.24E-02 | 0        | 0        | strict | edge_1_300  |
| 12  | 2.04E-03 | 2.04E-03 | 0        | 0        | strict | edge_1_300  |
| 13  | 6.29E-05 | 6.29E-05 | 27.173   | 27.362   | strict | edge_1_300  |
| 14  | 1.62E-02 | 1.70E-02 | 0        | 0        | strict | edge_1_300  |
| 15  | 6.74E-02 | 3.63E-02 | 0        | 0        | strict | edge_1_300  |
| 16  | 1.01E-07 | 1.01E-07 | 82.398   | 82.642   | strict | edge_1_300  |
| 17  | 4.41E-02 | 7.75E-03 | 0        | 0        | strict | edge_1_300  |
| 18  | 2.09E-05 | 2.09E-05 | 11.306   | 11.306   | strict | edge_1_300  |
| 19  | 7.36E-06 | 7.36E-06 | 54.777   | 54.777   | strict | edge_1_300  |
| 20  | 2.02E-07 | 1.45E-07 | 14.775   | 15.347   | strict | edge_1_300  |



|    |          |          |         |          |        |            |
|----|----------|----------|---------|----------|--------|------------|
| 21 | 6.02E-02 | 3.24E-02 | 0       | 0        | strict | edge_1_300 |
| 22 | 4.52E-06 | 3.45E-06 | 41.434  | 43.378   | strict | edge_1_300 |
| 23 | 6.74E-02 | 3.63E-02 | 0       | 0        | strict | edge_1_300 |
| 24 | 5.96E-02 | 4.14E-03 | 0       | 0        | strict | edge_1_300 |
| 25 | 8.70E-10 | 2.05E-10 | 474.146 | 525.612  | strict | edge_1_300 |
| 26 | 1.36E-02 | 3.05E-03 | 0       | 0        | strict | edge_1_300 |
| 27 | 4.55E-02 | 2.44E-02 | 0       | 0        | strict | edge_1_300 |
| 28 | 5.11E-04 | 4.85E-04 | 19.198  | 19.305   | strict | edge_1_300 |
| 29 | 5.92E-03 | 6.20E-03 | 0       | 0        | strict | edge_1_300 |
| 30 | 4.99E-03 | 7.30E-04 | 0       | 3.137    | strict | edge_1_300 |
| 31 | 3.80E-02 | 2.03E-02 | 0       | 0        | strict | edge_1_300 |
| 32 | 1.06E-02 | 1.81E-03 | 0       | 0        | strict | edge_1_300 |
| 33 | 4.85E-08 | 2.57E-08 | 42.923  | 45.653   | strict | edge_1_300 |
| 34 | 1.10E-01 | 5.99E-02 | 0       | 0        | strict | edge_1_300 |
| 35 | 2.59E-02 | 2.59E-02 | 0       | 0        | strict | edge_1_300 |
| 36 | 2.22E-03 | 7.10E-04 | 0       | 6.298    | strict | edge_1_300 |
| 37 | 6.84E-04 | 6.39E-04 | 6.219   | 6.248    | strict | edge_1_300 |
| 38 | 4.60E-04 | 4.60E-04 | 37.735  | 37.735   | strict | edge_1_300 |
| 39 | 2.34E-03 | 2.34E-03 | 0       | 0        | strict | edge_1_300 |
| 40 | 8.06E-03 | 8.06E-03 | 0       | 0        | strict | edge_1_300 |
| 41 | 7.45E-08 | 2.58E-08 | 52.806  | 57.105   | strict | edge_1_300 |
| 42 | 7.01E-03 | 4.03E-02 | 0       | 0        | strict | edge_1_300 |
| 43 | 1.54E-02 | 8.19E-03 | 0       | 0        | strict | edge_1_300 |
| 44 | 1.36E-02 | 1.01E-02 | 0       | 0        | strict | edge_1_300 |
| 45 | 1.30E-08 | 1.30E-08 | 84.581  | 84.581   | strict | edge_1_300 |
| 46 | 9.11E-03 | 2.14E-03 | 0       | 0        | strict | edge_1_300 |
| 47 | 1.62E-05 | 1.62E-05 | 17.709  | 17.798   | strict | edge_1_300 |
| 48 | 6.74E-02 | 3.63E-02 | 0       | 0        | strict | edge_1_300 |
| 49 | 5.28E-02 | 2.84E-02 | 0       | 0        | strict | edge_1_300 |
| 50 | 2.24E-03 | 2.24E-03 | 0       | 0        | strict | edge_1_300 |
| 51 | 1.77E-22 | 1.77E-22 | 5317.62 | 4583.774 | strict | edge_1_300 |
| 52 | 2.05E-08 | 1.46E-08 | 17.022  | 17.601   | strict | edge_1_300 |
| 53 | 1.89E-02 | 4.54E-03 | 0       | 0        | strict | edge_1_300 |
| 54 | 1.01E-07 | 2.06E-08 | 583.982 | 628.05   | strict | edge_1_300 |
| 55 | 1.61E-04 | 1.61E-04 | 3.793   | 3.793    | strict | edge_1_300 |
| 56 | 5.28E-02 | 2.84E-02 | 0       | 0        | strict | edge_1_300 |
| 57 | 6.02E-05 | 5.62E-05 | 171.688 | 152.206  | strict | edge_1_300 |
| 58 | 3.72E-07 | 2.96E-07 | 920.55  | 862.331  | strict | edge_1_300 |
| 59 | 9.82E-07 | 9.82E-07 | 14.039  | 14.039   | strict | edge_1_300 |
| 60 | 2.58E-08 | 2.58E-08 | 81.312  | 81.312   | strict | edge_1_300 |
| 61 | 4.34E-04 | 4.34E-04 | 6.433   | 6.557    | strict | edge_1_300 |
| 62 | 8.19E-03 | 5.70E-03 | 0       | 0        | strict | edge_1_300 |
| 63 | 3.05E-02 | 1.63E-02 | 0       | 0        | strict | edge_1_300 |
| 64 | 3.07E-13 | 3.07E-13 | 255.181 | 255.879  | strict | edge_1_300 |
| 65 | 9.29E-07 | 9.29E-07 | 89.78   | 90.263   | strict | edge_1_300 |
| 66 | 1.14E-03 | 1.08E-03 | 0       | 0        | strict | edge_1_300 |
| 67 | 1.54E-02 | 8.19E-03 | 0       | 0        | strict | edge_1_300 |
| 68 | 5.28E-02 | 2.84E-02 | 0       | 0        | strict | edge_1_300 |
| 69 | 3.06E-05 | 3.06E-05 | 44.888  | 45.076   | strict | edge_1_300 |

|     |          |          |          |          |        |            |
|-----|----------|----------|----------|----------|--------|------------|
| 70  | 3.05E-02 | 1.63E-02 | 0        | 0        | strict | edge_1_300 |
| 71  | 1.71E-07 | 1.55E-07 | 171.376  | 175.382  | strict | edge_1_300 |
| 72  | 8.85E-10 | 8.85E-10 | 96.969   | 96.969   | strict | edge_1_300 |
| 73  | 2.10E-02 | 1.57E-02 | 0        | 0        | strict | edge_1_300 |
| 74  | 1.62E-03 | 1.08E-03 | 0        | 0        | strict | edge_1_300 |
| 75  | 1.12E-04 | 6.02E-05 | 29.142   | 31.661   | strict | edge_1_300 |
| 76  | 4.55E-02 | 2.44E-02 | 0        | 0        | strict | edge_1_300 |
| 77  | 3.05E-02 | 1.63E-02 | 0        | 0        | strict | edge_1_300 |
| 78  | 4.84E-03 | 1.28E-03 | 0        | 0        | strict | edge_1_300 |
| 79  | 3.80E-02 | 2.03E-02 | 0        | 0        | strict | edge_1_300 |
| 80  | 6.02E-02 | 3.24E-02 | 0        | 0        | strict | edge_1_300 |
| 81  | 3.42E-05 | 3.03E-05 | 4.466    | 4.519    | strict | edge_1_300 |
| 82  | 4.84E-10 | 4.12E-10 | 191.049  | 220.315  | strict | edge_1_300 |
| 83  | 1.94E-03 | 9.45E-05 | 0        | 4.025    | strict | edge_1_300 |
| 84  | 3.43E-04 | 3.43E-04 | 22.592   | 22.614   | strict | edge_1_300 |
| 85  | 6.02E-02 | 3.24E-02 | 0        | 0        | strict | edge_1_300 |
| 86  | 1.40E-03 | 1.47E-03 | 0        | 0        | strict | edge_1_300 |
| 87  | 1.12E-10 | 9.48E-11 | 209.236  | 211.887  | strict | edge_1_300 |
| 88  | 2.42E-03 | 2.95E-04 | 0        | 3.53     | strict | edge_1_300 |
| 89  | 1.10E-07 | 4.54E-08 | 41.105   | 49.327   | strict | edge_1_300 |
| 90  | 2.00E-02 | 1.14E-02 | 0        | 0        | strict | edge_1_300 |
| 91  | 6.02E-02 | 3.24E-02 | 0        | 0        | strict | edge_1_300 |
| 92  | 5.10E-06 | 2.21E-06 | 30.122   | 32.071   | strict | edge_1_300 |
| 93  | 3.01E-02 | 1.28E-03 | 0        | 0        | strict | edge_1_300 |
| 94  | 9.37E-04 | 2.42E-04 | 33.104   | 85.771   | strict | edge_1_300 |
| 95  | 1.25E-02 | 3.24E-02 | 0        | 0        | strict | edge_1_300 |
| 96  | 5.65E-04 | 1.46E-04 | 22.108   | 39.357   | strict | edge_1_300 |
| 97  | 2.04E-03 | 2.04E-03 | 0        | 0        | strict | edge_1_300 |
| 98  | 1.13E-02 | 1.13E-02 | 0        | 0        | strict | edge_1_300 |
| 99  | 3.05E-02 | 1.63E-02 | 0        | 0        | strict | edge_1_300 |
| 100 | 9.90E-03 | 2.98E-03 | 0        | 0        | strict | edge_1_300 |
| 1   | 2.58E-08 | 2.58E-08 | 40.995   | 41.282   | strict | gfr        |
| 2   | 5.15E-04 | 5.15E-04 | 3.288    | 3.288    | strict | gfr        |
| 3   | 3.48E-06 | 3.14E-06 | 105.992  | 106.49   | strict | gfr        |
| 4   | 1.10E-19 | 8.61E-20 | 3624.495 | 3374.887 | strict | gfr        |
| 5   | 8.89E-02 | 4.82E-02 | 0        | 0        | strict | gfr        |
| 6   | 2.19E-08 | 2.19E-08 | 141.971  | 142.541  | strict | gfr        |
| 7   | 2.84E-09 | 2.12E-09 | 46.119   | 46.455   | strict | gfr        |
| 8   | 6.97E-07 | 6.97E-07 | 52.038   | 55.141   | strict | gfr        |
| 9   | 2.30E-02 | 2.24E-02 | 0        | 0        | strict | gfr        |
| 10  | 4.68E-06 | 4.68E-06 | 153.027  | 143.383  | strict | gfr        |
| 11  | 5.67E-04 | 5.30E-04 | 15.402   | 15.445   | strict | gfr        |
| 12  | 3.51E-07 | 2.99E-07 | 10.752   | 10.821   | strict | gfr        |
| 13  | 6.91E-11 | 1.65E-10 | 1849.404 | 1562.786 | strict | gfr        |
| 14  | 6.56E-07 | 5.85E-07 | 126.506  | 127.034  | strict | gfr        |
| 15  | 3.74E-04 | 3.74E-04 | 9.931    | 9.931    | strict | gfr        |
| 16  | 3.89E-61 | 3.89E-61 | 8528.074 | 7688.955 | strict | gfr        |
| 17  | 3.73E-08 | 1.69E-08 | 46.613   | 50.168   | strict | gfr        |
| 18  | 1.32E-03 | 1.24E-03 | 0        | 0        | strict | gfr        |

|    |          |          |          |          |        |     |
|----|----------|----------|----------|----------|--------|-----|
| 19 | 6.49E-13 | 6.49E-13 | 1578.039 | 1445.503 | strict | gfr |
| 20 | 1.50E-13 | 1.50E-13 | 83.847   | 84.142   | strict | gfr |
| 21 | 1.70E-19 | 9.17E-20 | 329.343  | 330.673  | strict | gfr |
| 22 | 4.00E-02 | 3.85E-02 | 0        | 0        | strict | gfr |
| 23 | 3.29E-03 | 3.29E-03 | 0        | 0        | strict | gfr |
| 24 | 3.88E-05 | 3.28E-05 | 55.052   | 56.919   | strict | gfr |
| 25 | 6.15E-05 | 6.15E-05 | 8.183    | 8.183    | strict | gfr |
| 26 | 2.79E-05 | 2.79E-05 | 32.562   | 32.788   | strict | gfr |
| 27 | 7.82E-06 | 7.82E-06 | 118.286  | 91.946   | strict | gfr |
| 28 | 4.52E-08 | 4.52E-08 | 220.691  | 184.803  | strict | gfr |
| 29 | 3.16E-05 | 3.16E-05 | 34.06    | 46.377   | strict | gfr |
| 30 | 2.18E-03 | 1.99E-03 | 0        | 0        | strict | gfr |
| 31 | 1.10E-02 | 1.10E-02 | 0        | 0        | strict | gfr |
| 32 | 3.06E-04 | 3.06E-04 | 3.514    | 3.514    | strict | gfr |
| 33 | 6.35E-10 | 6.35E-10 | 99.001   | 99.001   | strict | gfr |
| 34 | 1.03E-05 | 9.54E-06 | 317.887  | 271.003  | strict | gfr |
| 35 | 5.95E-03 | 5.70E-03 | 0        | 0        | strict | gfr |
| 36 | 6.95E-03 | 6.28E-03 | 0        | 0        | strict | gfr |
| 37 | 2.07E-03 | 1.83E-03 | 0        | 0        | strict | gfr |
| 38 | 2.30E-02 | 1.23E-02 | 0        | 0        | strict | gfr |
| 39 | 6.74E-02 | 3.63E-02 | 0        | 0        | strict | gfr |
| 40 | 6.59E-03 | 1.63E-02 | 0        | 0        | strict | gfr |
| 41 | 3.14E-04 | 3.03E-04 | 26.953   | 23.585   | strict | gfr |
| 42 | 1.27E-04 | 1.27E-04 | 3.896    | 3.896    | strict | gfr |
| 43 | 5.40E-07 | 3.44E-07 | 372.141  | 267.817  | strict | gfr |
| 44 | 7.92E-03 | 2.15E-03 | 0        | 0        | strict | gfr |
| 45 | 8.77E-05 | 8.77E-05 | 63.669   | 63.858   | strict | gfr |
| 46 | 6.82E-07 | 6.82E-07 | 267.575  | 238.569  | strict | gfr |
| 47 | 3.06E-05 | 2.84E-05 | 420.693  | 402.069  | strict | gfr |
| 48 | 7.55E-07 | 6.19E-07 | 72.539   | 60.36    | strict | gfr |
| 49 | 1.12E-10 | 9.48E-11 | 179.115  | 179.816  | strict | gfr |
| 50 | 2.82E-06 | 2.37E-06 | 81.272   | 66.173   | strict | gfr |
| 51 | 5.91E-03 | 5.38E-03 | 0        | 0        | strict | gfr |
| 52 | 0.00E+00 | 0.00E+00 | 72.96    | 72.96    | strict | gfr |
| 53 | 4.46E-03 | 9.26E-04 | 0        | 3.033    | strict | gfr |
| 54 | 1.18E-03 | 1.18E-03 | 0        | 0        | strict | gfr |
| 55 | 1.07E-04 | 1.07E-04 | 3.972    | 3.972    | strict | gfr |
| 56 | 2.76E-04 | 2.76E-04 | 3.559    | 3.559    | strict | gfr |
| 57 | 5.06E-03 | 4.21E-03 | 0        | 0        | strict | gfr |
| 58 | 1.21E-04 | 1.12E-04 | 66.387   | 66.54    | strict | gfr |
| 59 | 1.66E-03 | 1.57E-03 | 0        | 0        | strict | gfr |
| 60 | 8.76E-04 | 8.76E-04 | 6.065    | 6.065    | strict | gfr |
| 61 | 4.16E-05 | 6.03E-05 | 23.052   | 13.309   | strict | gfr |
| 62 | 4.69E-03 | 4.69E-03 | 0        | 0        | strict | gfr |
| 63 | 5.28E-02 | 2.84E-02 | 0        | 0        | strict | gfr |
| 64 | 2.41E-04 | 2.41E-04 | 20.322   | 34.013   | strict | gfr |
| 65 | 4.12E-03 | 2.96E-03 | 0        | 0        | strict | gfr |
| 66 | 6.47E-03 | 6.47E-03 | 0        | 0        | strict | gfr |
| 67 | 1.08E-03 | 8.47E-04 | 0        | 6.08     | strict | gfr |

|     |          |          |         |          |        |     |
|-----|----------|----------|---------|----------|--------|-----|
| 68  | 4.85E-04 | 4.85E-04 | 3.314   | 3.314    | strict | gfr |
| 69  | 3.66E-03 | 3.66E-03 | 0       | 0        | strict | gfr |
| 70  | 1.18E-03 | 1.18E-03 | 0       | 0        | strict | gfr |
| 71  | 3.22E-07 | 1.49E-07 | 37.508  | 49.789   | strict | gfr |
| 72  | 4.55E-02 | 2.44E-02 | 0       | 0        | strict | gfr |
| 73  | 6.00E-07 | 6.00E-07 | 66.312  | 66.312   | strict | gfr |
| 74  | 7.04E-14 | 7.04E-14 | 199.112 | 199.921  | strict | gfr |
| 75  | 5.28E-02 | 2.84E-02 | 0       | 0        | strict | gfr |
| 76  | 1.14E-08 | 8.06E-09 | 167.718 | 196.192  | strict | gfr |
| 77  | 2.70E-04 | 2.55E-04 | 17.178  | 17.271   | strict | gfr |
| 78  | 5.20E-03 | 8.52E-04 | 0       | 3.07     | strict | gfr |
| 79  | 1.48E-07 | 1.48E-07 | 1543.61 | 1384.663 | strict | gfr |
| 80  | 1.36E-02 | 1.01E-02 | 0       | 0        | strict | gfr |
| 81  | 2.44E-03 | 2.44E-03 | 0       | 0        | strict | gfr |
| 82  | 1.37E-35 | 1.37E-35 | 314.635 | 314.635  | strict | gfr |
| 83  | 1.03E-04 | 1.11E-04 | 15.431  | 11.749   | strict | gfr |
| 84  | 5.38E-03 | 1.20E-03 | 0       | 0        | strict | gfr |
| 85  | 8.82E-04 | 8.10E-04 | 3.054   | 3.091    | strict | gfr |
| 86  | 5.55E-02 | 2.60E-03 | 0       | 0        | strict | gfr |
| 87  | 1.27E-02 | 1.67E-03 | 0       | 0        | strict | gfr |
| 88  | 8.18E-02 | 4.42E-02 | 0       | 0        | strict | gfr |
| 89  | 2.00E-03 | 1.94E-03 | 0       | 0        | strict | gfr |
| 90  | 9.11E-04 | 8.42E-04 | 3.04    | 3.075    | strict | gfr |
| 91  | 6.58E-12 | 6.58E-12 | 291.931 | 297.281  | strict | gfr |
| 92  | 5.78E-08 | 5.78E-08 | 74.241  | 77.509   | strict | gfr |
| 93  | 1.27E-05 | 1.18E-05 | 368.324 | 347.782  | strict | gfr |
| 94  | 4.66E-03 | 1.13E-03 | 0       | 0        | strict | gfr |
| 95  | 1.03E-03 | 9.83E-04 | 0       | 3.008    | strict | gfr |
| 96  | 2.99E-04 | 2.85E-04 | 47.26   | 48.617   | strict | gfr |
| 97  | 1.06E-04 | 9.41E-05 | 72.693  | 65.685   | strict | gfr |
| 98  | 4.08E-04 | 3.44E-04 | 46.776  | 46.885   | strict | gfr |
| 99  | 6.82E-04 | 4.85E-04 | 27.583  | 40.565   | strict | gfr |
| 100 | 3.98E-25 | 3.98E-25 | 262.719 | 262.719  | strict | gfr |
| 1   | 5.28E-02 | 2.84E-02 | 0       | 0        | strict | pcs |
| 2   | 3.84E-06 | 1.51E-06 | 368.925 | 425.024  | strict | pcs |
| 3   | 1.79E-02 | 3.16E-03 | 0       | 0        | strict | pcs |
| 4   | 4.08E-04 | 3.84E-04 | 9.851   | 9.878    | strict | pcs |
| 5   | 8.76E-04 | 8.76E-04 | 3.057   | 3.057    | strict | pcs |
| 6   | 2.74E-04 | 4.06E-05 | 6.78    | 47.314   | strict | pcs |
| 7   | 5.62E-05 | 5.62E-05 | 14.729  | 14.85    | strict | pcs |
| 8   | 2.60E-03 | 9.04E-04 | 0       | 6.088    | strict | pcs |
| 9   | 1.08E-03 | 8.04E-04 | 0       | 9.11     | strict | pcs |
| 10  | 2.64E-03 | 9.83E-04 | 0       | 3.008    | strict | pcs |
| 11  | 3.28E-03 | 2.14E-03 | 0       | 0        | strict | pcs |
| 12  | 2.78E-03 | 1.61E-03 | 0       | 0        | strict | pcs |
| 13  | 1.21E-05 | 9.87E-06 | 22.946  | 23.036   | strict | pcs |
| 14  | 4.55E-02 | 2.44E-02 | 0       | 0        | strict | pcs |
| 15  | 8.74E-05 | 8.30E-05 | 7.518   | 7.569    | strict | pcs |
| 16  | 2.18E-02 | 6.95E-03 | 0       | 0        | strict | pcs |

|    |          |          |         |         |        |     |
|----|----------|----------|---------|---------|--------|-----|
| 17 | 5.49E-06 | 5.10E-06 | 5.26    | 5.293   | strict | pcs |
| 18 | 3.05E-02 | 1.63E-02 | 0       | 0       | strict | pcs |
| 19 | 4.85E-04 | 4.85E-04 | 90.976  | 162.554 | strict | pcs |
| 20 | 3.05E-02 | 1.63E-02 | 0       | 0       | strict | pcs |
| 21 | 2.45E-03 | 2.33E-03 | 0       | 0       | strict | pcs |
| 22 | 8.07E-06 | 8.07E-06 | 74.434  | 63.309  | strict | pcs |
| 23 | 2.77E-11 | 2.77E-11 | 113.505 | 113.505 | strict | pcs |
| 24 | 3.80E-02 | 2.03E-02 | 0       | 0       | strict | pcs |
| 25 | 4.55E-02 | 2.44E-02 | 0       | 0       | strict | pcs |
| 26 | 6.02E-02 | 3.24E-02 | 0       | 0       | strict | pcs |
| 27 | 8.49E-04 | 8.49E-04 | 6.115   | 6.115   | strict | pcs |
| 28 | 1.45E-02 | 1.45E-02 | 0       | 0       | strict | pcs |
| 29 | 3.80E-02 | 2.03E-02 | 0       | 0       | strict | pcs |
| 30 | 6.52E-04 | 6.52E-04 | 3.186   | 3.186   | strict | pcs |
| 31 | 1.75E-03 | 1.60E-03 | 0       | 0       | strict | pcs |
| 32 | 7.46E-02 | 4.03E-02 | 0       | 0       | strict | pcs |
| 33 | 6.02E-02 | 3.24E-02 | 0       | 0       | strict | pcs |
| 34 | 1.62E-03 | 8.04E-04 | 0       | 9.11    | strict | pcs |
| 35 | 1.62E-03 | 1.08E-03 | 0       | 0       | strict | pcs |
| 36 | 3.60E-03 | 3.69E-04 | 0       | 39.211  | strict | pcs |
| 37 | 2.98E-03 | 2.78E-03 | 0       | 0       | strict | pcs |
| 38 | 2.16E-03 | 2.16E-03 | 0       | 0       | strict | pcs |
| 39 | 1.44E-01 | 7.91E-02 | 0       | 0       | strict | pcs |
| 40 | 1.22E-06 | 1.18E-05 | 513.614 | 460.986 | strict | pcs |
| 41 | 9.11E-04 | 8.76E-04 | 3.04    | 3.057   | strict | pcs |
| 42 | 7.79E-05 | 6.72E-05 | 29.353  | 26.606  | strict | pcs |
| 43 | 1.18E-03 | 1.08E-03 | 0       | 0       | strict | pcs |
| 44 | 1.55E-04 | 1.55E-04 | 7.438   | 7.438   | strict | pcs |
| 45 | 5.34E-03 | 2.99E-03 | 0       | 0       | strict | pcs |
| 46 | 3.22E-03 | 3.03E-03 | 0       | 0       | strict | pcs |
| 47 | 8.18E-02 | 4.42E-02 | 0       | 0       | strict | pcs |
| 48 | 3.80E-02 | 2.03E-02 | 0       | 0       | strict | pcs |
| 49 | 8.86E-05 | 8.86E-05 | 11.375  | 7.98    | strict | pcs |
| 50 | 2.00E-04 | 2.00E-04 | 10.673  | 10.979  | strict | pcs |
| 51 | 9.83E-04 | 9.83E-04 | 3.008   | 6.015   | strict | pcs |
| 52 | 1.23E-03 | 1.23E-03 | 0       | 0       | strict | pcs |
| 53 | 1.62E-05 | 1.62E-05 | 17.709  | 17.798  | strict | pcs |
| 54 | 1.13E-02 | 1.78E-03 | 0       | 0       | strict | pcs |
| 55 | 9.83E-04 | 9.83E-04 | 3.008   | 3.008   | strict | pcs |
| 56 | 1.29E-05 | 5.41E-06 | 15.768  | 16.774  | strict | pcs |
| 57 | 2.02E-04 | 2.16E-03 | 3.696   | 0       | strict | pcs |
| 58 | 1.23E-03 | 1.23E-03 | 0       | 0       | strict | pcs |
| 59 | 8.00E-03 | 8.00E-03 | 0       | 0       | strict | pcs |
| 60 | 3.05E-02 | 1.63E-02 | 0       | 0       | strict | pcs |
| 61 | 1.13E-02 | 6.99E-04 | 0       | 9.271   | strict | pcs |
| 62 | 1.79E-02 | 6.90E-03 | 0       | 0       | strict | pcs |
| 63 | 3.80E-02 | 2.03E-02 | 0       | 0       | strict | pcs |
| 64 | 3.48E-03 | 3.35E-03 | 0       | 0       | strict | pcs |
| 65 | 3.05E-02 | 1.63E-02 | 0       | 0       | strict | pcs |

|     |          |          |         |         |        |     |
|-----|----------|----------|---------|---------|--------|-----|
| 66  | 4.55E-02 | 2.44E-02 | 0       | 0       | strict | pcs |
| 67  | 1.10E-05 | 1.10E-05 | 4.959   | 4.959   | strict | pcs |
| 68  | 9.83E-04 | 8.31E-04 | 6.014   | 6.088   | strict | pcs |
| 69  | 4.08E-04 | 3.59E-04 | 3.39    | 3.445   | strict | pcs |
| 70  | 2.84E-05 | 1.76E-05 | 4.546   | 4.755   | strict | pcs |
| 71  | 3.20E-03 | 8.04E-04 | 0       | 3.095   | strict | pcs |
| 72  | 2.04E-05 | 2.04E-05 | 68.53   | 61.406  | strict | pcs |
| 73  | 8.22E-07 | 8.22E-07 | 187.182 | 155.771 | strict | pcs |
| 74  | 5.52E-08 | 5.52E-08 | 61.811  | 48.499  | strict | pcs |
| 75  | 4.76E-05 | 1.32E-05 | 70.666  | 84.938  | strict | pcs |
| 76  | 4.34E-08 | 4.34E-08 | 112.265 | 112.754 | strict | pcs |
| 77  | 1.28E-06 | 1.15E-06 | 61.161  | 64.867  | strict | pcs |
| 78  | 3.84E-05 | 3.42E-05 | 8.713   | 8.763   | strict | pcs |
| 79  | 4.55E-02 | 2.44E-02 | 0       | 0       | strict | pcs |
| 80  | 6.02E-02 | 3.24E-02 | 0       | 0       | strict | pcs |
| 81  | 2.60E-03 | 2.60E-03 | 0       | 0       | strict | pcs |
| 82  | 5.93E-05 | 2.06E-05 | 37.536  | 30.465  | strict | pcs |
| 83  | 9.83E-04 | 9.83E-04 | 6.015   | 6.015   | strict | pcs |
| 84  | 4.69E-03 | 3.48E-03 | 0       | 0       | strict | pcs |
| 85  | 4.55E-02 | 2.44E-02 | 0       | 0       | strict | pcs |
| 86  | 1.51E-03 | 1.51E-03 | 0       | 0       | strict | pcs |
| 87  | 2.04E-03 | 1.85E-03 | 0       | 0       | strict | pcs |
| 88  | 2.00E-07 | 2.00E-07 | 69.474  | 69.685  | strict | pcs |
| 89  | 3.09E-03 | 1.19E-04 | 0       | 3.925   | strict | pcs |
| 90  | 3.92E-03 | 1.20E-03 | 0       | 0       | strict | pcs |
| 91  | 3.83E-03 | 7.44E-04 | 0       | 3.128   | strict | pcs |
| 92  | 6.02E-05 | 6.02E-05 | 4.22    | 4.22    | strict | pcs |
| 93  | 7.21E-05 | 1.06E-04 | 48.592  | 43.062  | strict | pcs |
| 94  | 1.58E-03 | 1.58E-03 | 0       | 0       | strict | pcs |
| 95  | 1.54E-03 | 9.59E-04 | 0       | 3.018   | strict | pcs |
| 96  | 6.07E-03 | 2.98E-03 | 0       | 0       | strict | pcs |
| 97  | 2.31E-04 | 2.31E-04 | 7.008   | 7.008   | strict | pcs |
| 98  | 6.00E-03 | 4.43E-03 | 0       | 0       | strict | pcs |
| 99  | 1.12E-10 | 9.48E-11 | 179.115 | 179.816 | strict | pcs |
| 100 | 3.00E-11 | 3.00E-11 | 108.853 | 108.853 | strict | pcs |

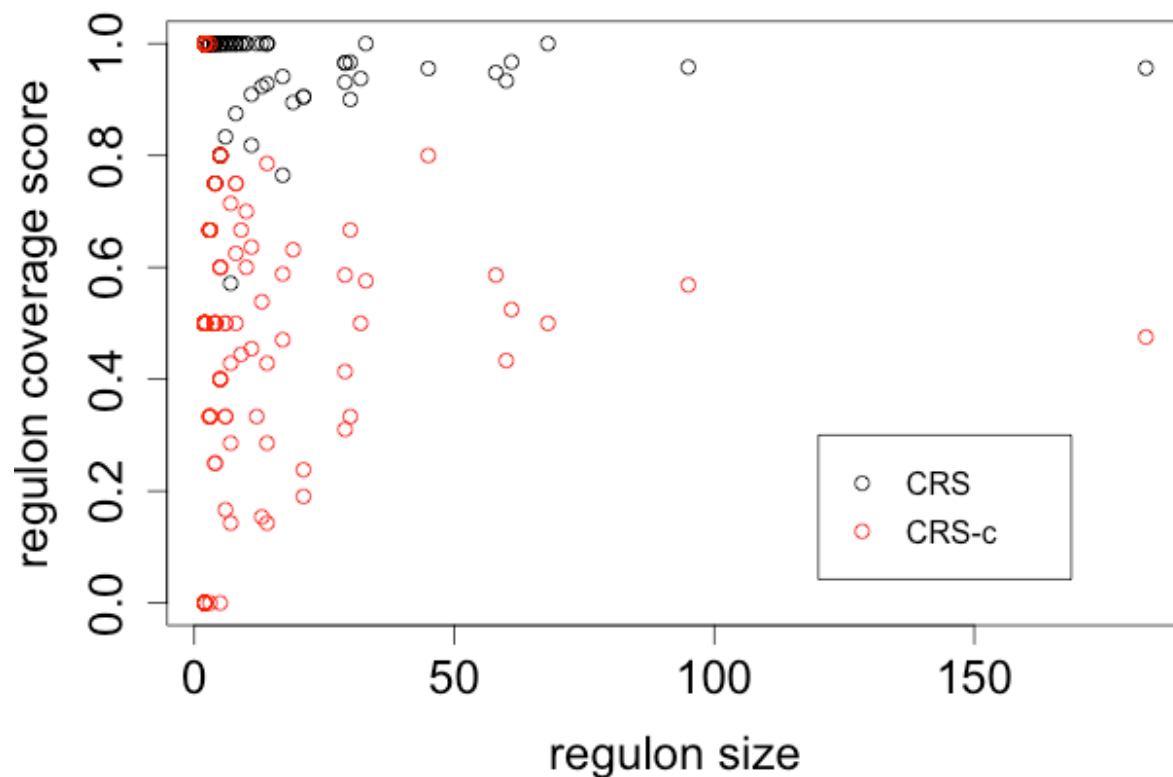

**Figure S1.** The coverage scores of all the known regulons in terms of the top 100 CRS clusters. The red and black dots are coverage scores calculated based on clique clusters (CRS-c) and optimized clusters (CRS), respectively.

#### **Appendix 1: The implementation of the new regulon prediction method on DIMINDA web server.**

To facilitate the users applying our new method to predict regulons on bacterial genomes, we have implemented it in integrated motif identification and analyses web server, DMINDA. We listed all 2,072 sequenced prokaryotic genomes, and the users can get regulon prediction results on them by several clicks as following.

**Step 1:** Go to the front page of DMINDA (<http://csbl.bmb.uga.edu/DMINDA/>), and click on the button “New function for REGULON prediction!”

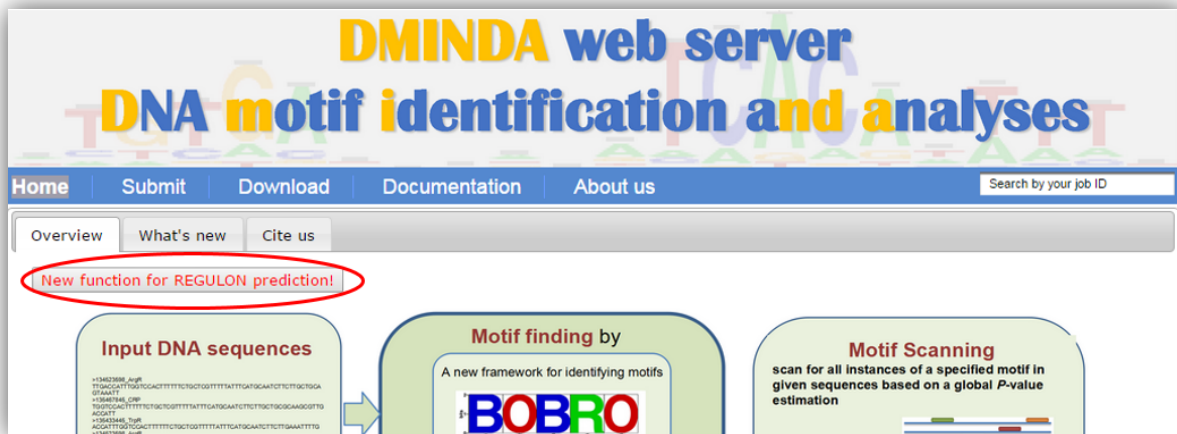

**Step 2:** A start page will provide a list including all the currently available 2,072 organisms with statistics about their genes, operons and non-coding regions. The users can select any interested genomes to predict regulons, e.g 'NC\_000913' or '*Escherichia coli* K-12 MG1655' as following:

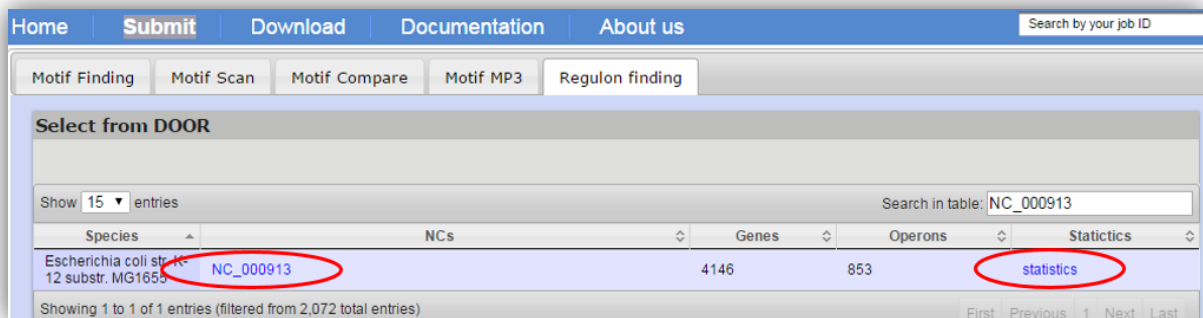

**Step 3:** In the next page, the web server will automatically upload all operons of selected genome. Also, the users have alternative option to upload the operons they are interesting in. Now click on "Submit" to run the regulon prediction job. Here the user has the option to enter an email address for results retrieval if he prefers.



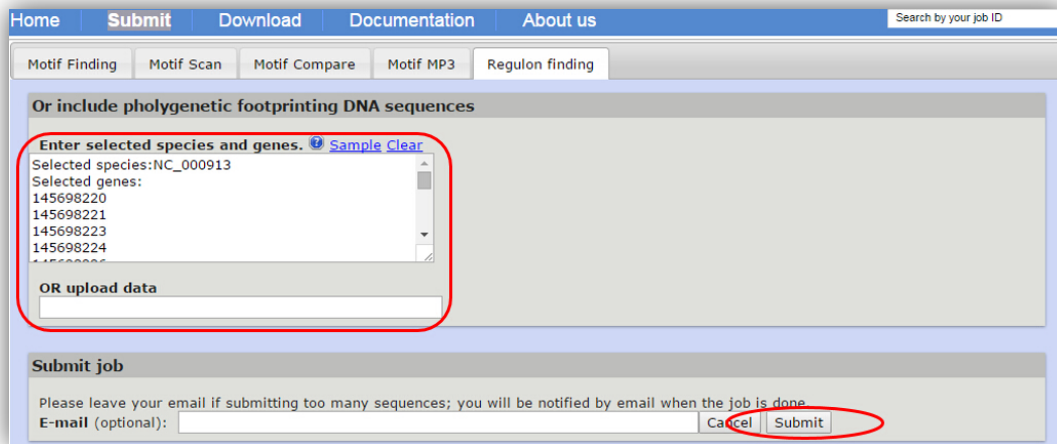

We take a set of *E. coli* K12 operons as an example to illustrate the regulon prediction results which can be retrieved by entering the job ID 2015112205052g into the searching box on our server. A result page lists the predicted regulons with their included operons. Besides, we also expand the predicted regulons by searching new member based on the corresponding motif profiles, which can be seen by click another tab 'expanded cluster'.

| regulon_number | include_operons                        |
|----------------|----------------------------------------|
| 1              | 1383298 3699 1382537 3539 1383553 3420 |
| 2              | 3635 1383298                           |
| 3              | 3072 1382746                           |
| 4              | 1382746 3631 1383149 1383544           |
| 5              | 1383893 1383596 1383392 1383553        |
| 6              | 1383596 1383256                        |
| 7              | 3539 1383555                           |
| 8              | 1382620 1383259 3627                   |
| 9              | 1383710 3183                           |
| 10             | 1382746 1383544                        |

Furthermore, the users can click on any list regulons or operon for more detail information. For regulons, we provide the details about its members and their regulatory region sequences:

| regulon_number | operon  | gi                   | synonym        | gene         | start              | end                | strand | length     | COG_code | product                                                                                       |
|----------------|---------|----------------------|----------------|--------------|--------------------|--------------------|--------|------------|----------|-----------------------------------------------------------------------------------------------|
| 1              | 1383298 | 16130988             | b3093          | exuT         | 3243126            | 3244544            | +      | 472        | -        | hexuronate transporter                                                                        |
| 1              | 3699    | 16131471<br>16131472 | b3600<br>b3601 | mttD<br>mttR | 3772447<br>3773595 | 3773595<br>3774182 | +      | 382<br>195 | -        | mannitol-1-phosphate dehydrogenase,<br>NAD-dependent<br>mannitol operon repressor             |
| 1              | 1382537 | 16128055             | b0061          | araD         | 65855              | 66550              | -      | 231        | -        | L-ribulose-5-phosphate 4-epimerase                                                            |
| 1              | 3539    | 16130707             | b2800          | fucA         | 2931063            | 2931710            | -      | 215        | -        | L-fuculose-1-phosphate aldolase                                                               |
| 1              | 1383553 | 16132031             | b4209          | ytfE         | 4429344            | 4430006            | -      | 220        | -        | iron-sulfur cluster repair protein RIC                                                        |
| 1              | 3420    | 16130174<br>16130175 | b2239<br>b2240 | glpQ<br>glpT | 2347957<br>2349038 | 2349033<br>2350396 | -      | 358<br>452 | -        | periplasmic glycerophosphodiester<br>phosphodiesterase<br>sn-glycerol-3-phosphate transporter |

Showing 1 to 6 of 6 entries

```
>NC_000913_opr_1383298_gi_16130988_+
CACCAATTTCAGAGTCCGAAAGATATTTCTGTGAGTTAGATCAATAAACGTAGTTAAAAAATTAAGTCTCAAAGTGGTAAATCTCGCTGCAGGCCGCCAGTACTGGCTTGCTGTCTCAGGTAATGTCCTACAAA
TATTCACACATTTGTGATGGCTCTCACCTTTTAAAGTTGATGACAAGTTATCTTTCTGCCGTCGCAAAATCAATAGTCGACGGAAATGCAAAATGCGCATTATTGTTGATAGATGAAATACCGGTACGGAA
GCCGAATTAGCACGAACTTT
>NC_000913_opr_3699_gi_16131471_16131472_+
TCCAAATCCACCCCTCCACATGGAGAAGGTGGGGTTAATTGCCTGATGCGCTACGCTTATCAGGCCATCAGGATGCATCACAATTTGTTGAATTTGCACGTTCTTGTAGGCCGGATAAG6CGCTTACGCCGATCCGG
CGCTGCCCTCTCTCCAGGAGGGTTTGGGTGAGGGAAAAGCTCAACCCAGCCCTCTGGGTAAAACATTGATGAGGGTAAATCT
```

For the operons in regulons, we provide extra information about their predicted motifs, including motif logo, width, p-value, motif instances and its locations as following:

| GI       | Start   | End     | Strand | Gene | Synonym | COG | Product                |
|----------|---------|---------|--------|------|---------|-----|------------------------|
| 16130988 | 3243126 | 3244544 | +      | exuT | b3093   | -   | hexuronate transporter |

| Gi       | Gene | Synonym | Start   | End     | Hairpin | Tail    | Sequence                                                 | Confidence |
|----------|------|---------|---------|---------|---------|---------|----------------------------------------------------------|------------|
| 16130988 | exuT | b3093   | 3244576 | 3244593 | -12.7   | -4.7497 | TAGTTTCCCTTCAA GCGCCT<br>TCTC AGGCGGC<br>TTTTTCATCACTGCG | 100        |

All motifs in 1383298 promoter, the 1383298\_3 motif in this regulon

Motif Scan [Download input](#) [Download result](#)

Show 10 entries

| All                      | Motif logo                                                                          | Length | Pvalue        | Number | Seq | Start | End | Motif        | Score | Info  |
|--------------------------|-------------------------------------------------------------------------------------|--------|---------------|--------|-----|-------|-----|--------------|-------|-------|
| <input type="checkbox"/> | 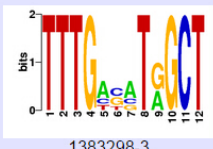 | 12     | 8.3E-10 (908) | 5      | 1   | 150   | 161 | TTTGTGATGGCT | 16.03 | NC_00 |
| <input type="checkbox"/> |                                                                                     |        |               |        | 18  | 63    | 74  | TTTGACATGGCT | 15.53 | NC_00 |
| <input type="checkbox"/> |                                                                                     |        |               |        | 43  | 36    | 47  | TTTGATCTGGCT | 15.23 | NC_00 |
| <input type="checkbox"/> |                                                                                     |        |               |        | 15  | 112   | 123 | TTTGACATAGCT | 14.28 | NC_00 |
| <input type="checkbox"/> |                                                                                     |        |               |        | 29  | 3     | 14  | TTTGCGGTAGCT | 13.63 | NC_00 |
